# Supplementary material for: Gene and metabolite expression dependence on body mass index in human myocardium
Source: bioRxiv or medRxiv preprint supplement (doi:10.1101/2021.06.29.21259697), 2021-07-03
Supplement: Supplementary file [file media-1.pdf]

## SUPPLEMENTAL MATERIAL

### Gene and metabolite expression dependence on body mass index in human myocardium.

Adewale S Adebayo, Marius Roman, Syabira Yusoff, Melanie Gulston, Lathishia Joel-David, Bony Anthony, Florence Y Lai, Antonio Murgia, Bryony Eagle-Hemming, Sophia Sheikh, Tracy Kumar, Hardeep Aujla, Will Dott, Julian L Griffin, Gavin J Murphy, Marcin J Woźniak

### Contents

|                                                                                                                         |    |
|-------------------------------------------------------------------------------------------------------------------------|----|
| Table S1 – Breakdown of samples with transcriptomics and metabolomics analyses.....                                     | 2  |
| Table S2 – Results of the Two Lines analysis .....                                                                      | 3  |
| Table S3 - Pre- and Post-operative characteristics in samples with transcriptomics and metabolomics analyses.....       | 20 |
| Table S4 – Details of the pathway analysis. ....                                                                        | 22 |
| Table S5 – Details of genes that were highly variable between the BMI groups .....                                      | 25 |
| Figure S1 – Plots of transcripts with the membership in significant pathways and showing biphasic BMI relationship..... | 45 |
| Figure S2 – Plots of metabolite values as a function of BMI. ....                                                       | 46 |

**Table S1** – Breakdown of samples with transcriptomics and metabolomics analyses.

| ID | Transcriptomics | Metabolomics | BMI | Group     |
|----|-----------------|--------------|-----|-----------|
| 1  | Yes             | Yes          | 18  | BMI<25    |
| 2  | Yes             | Yes          | 19  | BMI<25    |
| 3  | Yes             | Yes          | 19  | BMI<25    |
| 4  | Yes             | Yes          | 21  | BMI<25    |
| 58 | RIN<8           | Yes          | 21  | BMI<25    |
| 5  | Yes             | Yes          | 22  | BMI<25    |
| 6  | Yes             | Yes          | 22  | BMI<25    |
| 7  | Yes             | Yes          | 22  | BMI<25    |
| 34 | Yes             | Yes          | 22  | BMI<25    |
| 38 | Yes             | Yes          | 22  | BMI<25    |
| 42 | Yes             | Yes          | 22  | BMI<25    |
| 47 | Yes             | Yes          | 23  | BMI<25    |
| 48 | Yes             | Yes          | 23  | BMI<25    |
| 8  | Yes             | Yes          | 24  | BMI<25    |
| 9  | Yes             | Yes          | 24  | BMI<25    |
| 29 | Yes             | Yes          | 24  | BMI<25    |
| 10 | Yes             | Yes          | 25  | 25≥BMI≤32 |
| 11 | Yes             | Yes          | 25  | 25≥BMI≤32 |
| 12 | Yes             | Yes          | 25  | 25≥BMI≤32 |
| 32 | Yes             | Yes          | 25  | 25≥BMI≤32 |
| 13 | Yes             | Yes          | 26  | 25≥BMI≤32 |
| 14 | Yes             | Yes          | 26  | 25≥BMI≤32 |
| 28 | Yes             | Yes          | 26  | 25≥BMI≤32 |
| 30 | Yes             | Yes          | 26  | 25≥BMI≤32 |
| 33 | Yes             | Yes          | 26  | 25≥BMI≤32 |
| 54 | RIN<8           | Yes          | 26  | 25≥BMI≤32 |
| 55 | RIN<8           | Yes          | 26  | 25≥BMI≤32 |
| 56 | RIN<8           | Yes          | 26  | 25≥BMI≤32 |
| 15 | Yes             | Yes          | 27  | 25≥BMI≤32 |
| 27 | Yes             | Yes          | 27  | 25≥BMI≤32 |
| 16 | Yes             | Yes          | 28  | 25≥BMI≤32 |
| 17 | Yes             | Yes          | 28  | 25≥BMI≤32 |
| 18 | Yes             | Yes          | 28  | 25≥BMI≤32 |
| 36 | Yes             | Yes          | 28  | 25≥BMI≤32 |
| 41 | Yes             | Yes          | 28  | 25≥BMI≤32 |
| 19 | Yes             | Yes          | 29  | 25≥BMI≤32 |
| 20 | Yes             | Yes          | 29  | 25≥BMI≤32 |
| 35 | Yes             | Yes          | 29  | 25≥BMI≤32 |
| 49 | Yes             | Yes          | 29  | 25≥BMI≤32 |
| 21 | Yes             | Yes          | 30  | 25≥BMI≤32 |
| 45 | Yes             | Yes          | 30  | 25≥BMI≤32 |
| 53 | Yes             | NA           | 31  | 25≥BMI≤32 |
| 22 | Yes             | Yes          | 32  | 25≥BMI≤32 |
| 43 | Yes             | removed      | 32  | 25≥BMI≤32 |
| 25 | Yes             | Yes          | 32  | 25≥BMI≤32 |
| 40 | Yes             | Yes          | 32  | 25≥BMI≤32 |
| 52 | Yes             | NA           | 32  | 25≥BMI≤32 |
| 26 | Yes             | Yes          | 34  | BMI>32    |
| 39 | Yes             | Yes          | 34  | BMI>32    |
| 44 | Yes             | Yes          | 34  | BMI>32    |
| 57 | RIN<8           | Yes          | 34  | BMI>32    |
| 46 | Yes             | Yes          | 34  | BMI>32    |
| 50 | Yes             | Yes          | 34  | BMI>32    |
| 23 | Yes             | Yes          | 35  | BMI>32    |
| 31 | Yes             | Yes          | 35  | BMI>32    |
| 37 | Yes             | Yes          | 38  | BMI>32    |
| 51 | Yes             | Yes          | 39  | BMI>32    |
| 24 | Yes             | Yes          | 41  | BMI>32    |
| 59 | NA              | NA           | 29  | 25≥BMI≤32 |
| 60 | NA              | NA           | 27  | 25≥BMI≤32 |
| 61 | NA              | NA           | 33  | BMI>32    |
| 62 | NA              | NA           | 29  | 25≥BMI≤32 |
| 63 | NA              | NA           | 29  | 25≥BMI≤32 |
| 64 | NA              | NA           | 28  | 25≥BMI≤32 |
| 65 | NA              | NA           | 32  | 25≥BMI≤32 |
| 66 | NA              | NA           | 28  | 25≥BMI≤32 |

Table S2 – Results of the Two Lines analysis for all transcripts significant for both regression lines and for metabolites significant between the analyzed group. z1, z2 – test statistics for both regression lines; b1, b2 – regression coefficients, p1, p2 – p-values for each regression line.

| Ensembl ID      | Gene description                                                         | Gene/metabolite name | Type           | b1     | z1     | p1    | b2     | z2     | p2    | breakpoint |
|-----------------|--------------------------------------------------------------------------|----------------------|----------------|--------|--------|-------|--------|--------|-------|------------|
| ENSG00000272768 | novel transcript, antisense to PURB                                      | AC004854.2           | lncRNA         | -0.446 | -3.137 | 0.002 | 0.090  | 2.637  | 0.008 | 24         |
| ENSG00000269696 | novel transcript, antisense to ZFP28                                     | AC005498.3           | lncRNA         | -0.209 | -2.230 | 0.026 | 0.081  | 2.182  | 0.029 | 25         |
| ENSG00000224063 | novel transcript, antisense to TFPI and CALCRL                           | AC007319.1           | lncRNA         | 0.163  | 2.556  | 0.011 | -0.113 | -2.839 | 0.005 | 28         |
| ENSG00000279249 | novel transcript, antisense to CBLN1                                     | AC007614.1           | lncRNA         | 0.189  | 2.883  | 0.004 | -0.180 | -2.176 | 0.030 | 28         |
| ENSG00000267179 | novel protein                                                            | AC008770.2           | protein_coding | -0.184 | -2.105 | 0.035 | 0.257  | 3.266  | 0.001 | 29         |
| ENSG00000279598 | novel transcript, antisense to titin                                     | AC009948.3           | TEC            | 0.131  | 2.658  | 0.008 | -0.121 | -2.618 | 0.009 | 26         |
| ENSG00000272622 | novel transcript                                                         | AC010735.2           | lncRNA         | -0.138 | -2.170 | 0.030 | 0.042  | 2.067  | 0.039 | 26         |
| ENSG00000285596 | novel transcript                                                         | AC017116.2           | lncRNA         | 0.151  | 2.428  | 0.015 | -0.116 | -2.319 | 0.020 | 28         |
| ENSG00000186019 | novel transcript, antisense to ZNF225 and ZNF224                         | AC021092.1           | lncRNA         | 0.096  | 2.072  | 0.038 | -0.089 | -2.863 | 0.004 | 30         |
| ENSG00000248115 | novel transcript                                                         | AC023154.1           | lncRNA         | -0.083 | -2.171 | 0.030 | 0.059  | 2.625  | 0.009 | 28         |
| ENSG00000273771 | novel transcript                                                         | AC024337.2           | lncRNA         | -0.102 | -2.679 | 0.007 | 0.087  | 3.059  | 0.002 | 27         |
| ENSG00000273329 | novel transcript                                                         | AC078846.1           | lncRNA         | 0.038  | 2.365  | 0.018 | -0.112 | -2.986 | 0.003 | 32         |
| ENSG00000253190 | novel transcript                                                         | AC084082.1           | lncRNA         | -0.183 | -2.264 | 0.024 | 0.113  | 3.199  | 0.001 | 26         |
| ENSG00000267127 | novel protein                                                            | AC090360.1           | protein_coding | 0.100  | 2.769  | 0.006 | -0.186 | -3.917 | 0.000 | 32         |
| ENSG00000279283 | novel transcript                                                         | AC131009.4           | TEC            | 0.115  | 2.272  | 0.023 | -0.096 | -2.424 | 0.015 | 28         |
| ENSG00000279204 | TEC                                                                      | AC134043.3           | TEC            | -0.167 | -2.674 | 0.008 | 0.065  | 2.122  | 0.034 | 26         |
| ENSG00000182827 | acyl-CoA binding domain containing 3 [Source:HGNC Symbol;Acc:HGNC:15453] | ACBD3                | protein_coding | -0.041 | -2.533 | 0.011 | 0.018  | 2.151  | 0.032 | 26         |
| ENSG00000118507 | A-kinase anchoring protein 7 [Source:HGNC Symbol;Acc:HGNC:377]           | AKAP7                | protein_coding | -0.076 | -2.601 | 0.009 | 0.083  | 3.676  | 0.000 | 28         |
| ENSG00000285723 | novel protein                                                            | AL034430.2           | protein_coding | 0.070  | 1.997  | 0.046 | -0.073 | -2.264 | 0.024 | 29         |

|                 |                                                                                                                      |            |                                  |        |        |       |        |        |       |    |
|-----------------|----------------------------------------------------------------------------------------------------------------------|------------|----------------------------------|--------|--------|-------|--------|--------|-------|----|
| ENSG00000276809 | novel transcript, sense intronic to DNAJC3                                                                           | AL138955.1 | lncRNA                           | -0.279 | -4.095 | 0.000 | 0.088  | 2.432  | 0.015 | 26 |
| ENSG00000187186 | uncharacterized LOC730098 [Source:NCBI gene (formerly Entrezgene);Acc:730098]                                        | AL162231.1 | protein_coding                   | -0.108 | -1.983 | 0.047 | 0.078  | 1.972  | 0.049 | 26 |
| ENSG00000269896 | small nuclear ribonucleoprotein N (SNRPN) pseudogene                                                                 | AL513477.1 | transcribed_processed_pseudogene | 0.095  | 2.243  | 0.025 | -0.154 | -2.569 | 0.010 | 28 |
| ENSG00000253710 | ALG11 alpha-1,2-mannosyltransferase [Source:HGNC Symbol;Acc:HGNC:32456]                                              | ALG11      | protein_coding                   | 0.034  | 2.115  | 0.034 | -0.025 | -2.198 | 0.028 | 29 |
| ENSG00000139645 | ankyrin repeat domain 52 [Source:HGNC Symbol;Acc:HGNC:26614]                                                         | ANKRD52    | protein_coding                   | 0.047  | 2.300  | 0.021 | -0.045 | -2.323 | 0.020 | 28 |
| ENSG00000151572 | anoctamin 4 [Source:HGNC Symbol;Acc:HGNC:23837]                                                                      | ANO4       | protein_coding                   | 0.100  | 2.381  | 0.017 | -0.198 | -3.228 | 0.001 | 29 |
| ENSG00000106367 | adaptor related protein complex 1 subunit sigma 1 [Source:HGNC Symbol;Acc:HGNC:559]                                  | AP1S1      | protein_coding                   | -0.040 | -2.176 | 0.030 | 0.048  | 2.137  | 0.033 | 30 |
| ENSG00000136044 | adaptor protein, phosphotyrosine interacting with PH domain and leucine zipper 2 [Source:HGNC Symbol;Acc:HGNC:18242] | APPL2      | protein_coding                   | 0.053  | 2.519  | 0.012 | -0.040 | -2.633 | 0.008 | 28 |
| ENSG00000177479 | ariadne RBR E3 ubiquitin protein ligase 2 [Source:HGNC Symbol;Acc:HGNC:690]                                          | ARIH2      | protein_coding                   | -0.072 | -2.156 | 0.031 | 0.011  | 1.983  | 0.047 | 24 |
| ENSG00000177917 | ADP ribosylation factor like GTPase 6 interacting protein 6 [Source:HGNC Symbol;Acc:HGNC:24048]                      | ARL6IP6    | protein_coding                   | -0.106 | -2.635 | 0.008 | 0.054  | 2.031  | 0.042 | 27 |
| ENSG00000224470 | ataxin 1 like [Source:HGNC Symbol;Acc:HGNC:33279]                                                                    | ATXN1L     | protein_coding                   | -0.024 | -3.174 | 0.002 | 0.021  | 2.745  | 0.006 | 28 |
| ENSG00000105778 | AVL9 cell migration associated [Source:HGNC Symbol;Acc:HGNC:28994]                                                   | AVL9       | protein_coding                   | 0.048  | 2.834  | 0.005 | -0.024 | -1.971 | 0.049 | 26 |
| ENSG00000162630 | beta-1,3-galactosyltransferase 2 [Source:HGNC Symbol;Acc:HGNC:917]                                                   | B3GALT2    | protein_coding                   | -0.110 | -2.674 | 0.007 | 0.038  | 2.138  | 0.032 | 25 |
| ENSG00000123810 | B9 domain containing 2 [Source:HGNC Symbol;Acc:HGNC:28636]                                                           | B9D2       | protein_coding                   | 0.143  | 2.186  | 0.029 | -0.082 | -2.050 | 0.040 | 28 |

|                 |                                                                                             |           |                                  |        |        |       |        |        |       |    |
|-----------------|---------------------------------------------------------------------------------------------|-----------|----------------------------------|--------|--------|-------|--------|--------|-------|----|
| ENSG00000169925 | bromodomain containing 3 [Source:HGNC Symbol;Acc:HGNC:1104]                                 | BRD3      | protein_coding                   | 0.037  | 2.912  | 0.004 | -0.039 | -2.805 | 0.005 | 29 |
| ENSG00000164061 | bassoon presynaptic cytomatrix protein [Source:HGNC Symbol;Acc:HGNC:1117]                   | BSN       | protein_coding                   | 0.219  | 3.092  | 0.002 | -0.066 | -2.848 | 0.004 | 25 |
| ENSG00000148925 | BTB domain containing 10 [Source:HGNC Symbol;Acc:HGNC:21445]                                | BTBD10    | protein_coding                   | -0.057 | -3.007 | 0.003 | 0.024  | 2.199  | 0.028 | 27 |
| ENSG00000240809 | CAP1 pseudogene 1 [Source:HGNC Symbol;Acc:HGNC:31134]                                       | CAP1P1    | processed_pseudogene             | -0.084 | -2.217 | 0.027 | 0.090  | 2.214  | 0.027 | 29 |
| ENSG00000110619 | cysteinyl-tRNA synthetase 1 [Source:HGNC Symbol;Acc:HGNC:1493]                              | CARS1     | protein_coding                   | 0.041  | 2.210  | 0.027 | -0.044 | -2.616 | 0.009 | 29 |
| ENSG00000165813 | coiled-coil domain containing 186 [Source:HGNC Symbol;Acc:HGNC:24349]                       | CCDC186   | protein_coding                   | -0.037 | -2.090 | 0.037 | 0.023  | 2.444  | 0.015 | 25 |
| ENSG00000166510 | coiled-coil domain containing 68 [Source:HGNC Symbol;Acc:HGNC:24350]                        | CCDC68    | protein_coding                   | 0.066  | 2.633  | 0.008 | -0.063 | -3.113 | 0.002 | 28 |
| ENSG00000275385 | C-C motif chemokine ligand 18 [Source:HGNC Symbol;Acc:HGNC:10616]                           | CCL18     | protein_coding                   | -0.186 | -2.677 | 0.007 | 0.414  | 3.641  | 0.000 | 32 |
| ENSG00000149654 | cadherin 22 [Source:HGNC Symbol;Acc:HGNC:13251]                                             | CDH22     | protein_coding                   | 0.111  | 2.179  | 0.029 | -0.162 | -2.528 | 0.011 | 28 |
| ENSG00000213753 | CENPB DNA-binding domains containing 1 pseudogene 1 [Source:HGNC Symbol;Acc:HGNC:28421]     | CENPBD1P1 | transcribed_processed_pseudogene | -0.069 | -2.235 | 0.025 | 0.078  | 3.088  | 0.002 | 27 |
| ENSG00000172831 | carboxylesterase 2 [Source:HGNC Symbol;Acc:HGNC:1864]                                       | CES2      | protein_coding                   | 0.027  | 2.195  | 0.028 | -0.024 | -2.540 | 0.011 | 28 |
| ENSG00000116785 | complement factor H related 3 [Source:HGNC Symbol;Acc:HGNC:16980]                           | CFHR3     | protein_coding                   | -0.343 | -2.763 | 0.006 | 0.106  | 2.179  | 0.029 | 25 |
| ENSG00000125611 | coiled-coil-helix-coiled-coil-helix domain containing 5 [Source:HGNC Symbol;Acc:HGNC:17840] | CHCHD5    | protein_coding                   | -0.050 | -2.142 | 0.032 | 0.051  | 2.135  | 0.033 | 29 |
| ENSG00000090539 | chordin [Source:HGNC Symbol;Acc:HGNC:1949]                                                  | CHRD      | protein_coding                   | 0.075  | 2.358  | 0.018 | -0.107 | -4.389 | 0.000 | 29 |
| ENSG00000247572 | CKMT2 antisense RNA 1 [Source:HGNC Symbol;Acc:HGNC:48997]                                   | CKMT2-AS1 | lncRNA                           | 0.114  | 2.156  | 0.031 | -0.054 | -2.442 | 0.015 | 28 |

|                 |                                                                                       |         |                |        |        |       |        |        |       |    |
|-----------------|---------------------------------------------------------------------------------------|---------|----------------|--------|--------|-------|--------|--------|-------|----|
| ENSG00000175505 | cardiotrophin like cytokine factor 1 [Source:HGNC Symbol;Acc:HGNC:17412]              | CLCF1   | protein_coding | -0.070 | -2.651 | 0.008 | 0.114  | 2.587  | 0.010 | 32 |
| ENSG00000111729 | C-type lectin domain family 4 member A [Source:HGNC Symbol;Acc:HGNC:13257]            | CLEC4A  | protein_coding | -0.204 | -2.578 | 0.010 | 0.285  | 3.403  | 0.001 | 30 |
| ENSG00000198791 | CCR4-NOT transcription complex subunit 7 [Source:HGNC Symbol;Acc:HGNC:14101]          | CNOT7   | protein_coding | -0.018 | -2.191 | 0.028 | 0.018  | 2.200  | 0.028 | 28 |
| ENSG00000136943 | cathepsin V [Source:HGNC Symbol;Acc:HGNC:2538]                                        | CTSV    | protein_coding | -0.098 | -1.962 | 0.050 | 0.248  | 2.919  | 0.004 | 29 |
| ENSG00000132716 | DDb1 and CUL4 associated factor 8 [Source:HGNC Symbol;Acc:HGNC:24891]                 | DCAF8   | protein_coding | 0.039  | 2.759  | 0.006 | -0.033 | -2.178 | 0.029 | 26 |
| ENSG00000145214 | diacylglycerol kinase theta [Source:HGNC Symbol;Acc:HGNC:2856]                        | DGKQ    | protein_coding | 0.223  | 3.617  | 0.000 | -0.056 | -2.940 | 0.003 | 25 |
| ENSG00000138246 | DnaJ heat shock protein family (Hsp40) member C13 [Source:HGNC Symbol;Acc:HGNC:30343] | DNAJC13 | protein_coding | 0.028  | 3.625  | 0.000 | -0.038 | -2.974 | 0.003 | 29 |
| ENSG00000178498 | deltex E3 ubiquitin ligase 3 [Source:HGNC Symbol;Acc:HGNC:24457]                      | DTX3    | protein_coding | 0.018  | 2.124  | 0.034 | -0.040 | -2.110 | 0.035 | 32 |
| ENSG00000243701 | DPPA2 upstream binding RNA [Source:HGNC Symbol;Acc:HGNC:48569]                        | DUBR    | lncRNA         | 0.058  | 2.567  | 0.010 | -0.047 | -2.271 | 0.023 | 29 |
| ENSG00000093144 | ethylmalonyl-CoA decarboxylase 1 [Source:HGNC Symbol;Acc:HGNC:21489]                  | ECHDC1  | protein_coding | 0.064  | 3.604  | 0.000 | -0.022 | -2.117 | 0.034 | 26 |
| ENSG00000203734 | epithelial cell transforming 2 like [Source:HGNC Symbol;Acc:HGNC:21118]               | ECT2L   | protein_coding | -0.387 | -2.423 | 0.015 | 0.094  | 2.022  | 0.043 | 25 |
| ENSG00000186976 | EF-hand calcium binding domain 6 [Source:HGNC Symbol;Acc:HGNC:24204]                  | EFCAB6  | protein_coding | -0.151 | -2.813 | 0.005 | 0.051  | 2.123  | 0.034 | 26 |
| ENSG00000145242 | EPH receptor A5 [Source:HGNC Symbol;Acc:HGNC:3389]                                    | EPHA5   | protein_coding | 0.109  | 2.648  | 0.008 | -0.132 | -2.722 | 0.006 | 29 |
| ENSG00000089248 | endoplasmic reticulum protein 29 [Source:HGNC Symbol;Acc:HGNC:13799]                  | ERP29   | protein_coding | 0.035  | 2.037  | 0.042 | -0.018 | -2.599 | 0.009 | 26 |
| ENSG00000157557 | ETS proto-oncogene 2, transcription factor                                            | ETS2    | protein_coding | -0.037 | -2.199 | 0.028 | 0.045  | 2.913  | 0.004 | 28 |

|                 |                                                                                           |         |                |        |        |       |        |        |       |    |
|-----------------|-------------------------------------------------------------------------------------------|---------|----------------|--------|--------|-------|--------|--------|-------|----|
|                 | [Source:HGNC<br>Symbol;Acc:HGNC:3489]                                                     |         |                |        |        |       |        |        |       |    |
| ENSG00000184083 | family with sequence similarity 120C [Source:HGNC Symbol;Acc:HGNC:16949]                  | FAM120C | protein_coding | -0.073 | -2.155 | 0.031 | 0.043  | 2.208  | 0.027 | 28 |
| ENSG00000221909 | family with sequence similarity 200 member A [Source:HGNC Symbol;Acc:HGNC:25401]          | FAM200A | protein_coding | -0.104 | -2.723 | 0.006 | 0.045  | 2.194  | 0.028 | 26 |
| ENSG00000071859 | family with sequence similarity 50 member A [Source:HGNC Symbol;Acc:HGNC:18786]           | FAM50A  | protein_coding | -0.066 | -5.312 | 0.000 | 0.022  | 2.051  | 0.040 | 26 |
| ENSG00000167196 | F-box protein 22 [Source:HGNC Symbol;Acc:HGNC:13593]                                      | FBXO22  | protein_coding | -0.114 | -2.683 | 0.007 | 0.029  | 2.077  | 0.038 | 25 |
| ENSG00000142748 | ficolin 3 [Source:HGNC Symbol;Acc:HGNC:3625]                                              | FCN3    | protein_coding | 0.182  | 3.313  | 0.001 | -0.067 | -2.052 | 0.040 | 28 |
| ENSG00000109158 | gamma-aminobutyric acid type A receptor subunit alpha4 [Source:HGNC Symbol;Acc:HGNC:4078] | GABRA4  | protein_coding | -0.391 | -3.287 | 0.001 | 0.143  | 2.749  | 0.006 | 26 |
| ENSG00000136542 | polypeptide N-acetylgalactosaminyltransferase 5 [Source:HGNC Symbol;Acc:HGNC:4127]        | GALNT5  | protein_coding | 0.076  | 2.960  | 0.003 | -0.061 | -2.015 | 0.044 | 29 |
| ENSG00000005436 | GC-rich sequence DNA-binding factor 2 [Source:HGNC Symbol;Acc:HGNC:1317]                  | GCFC2   | protein_coding | -0.128 | -4.328 | 0.000 | 0.041  | 2.975  | 0.003 | 25 |
| ENSG00000162676 | growth factor independent 1 transcriptional repressor [Source:HGNC Symbol;Acc:HGNC:4237]  | GFI1    | protein_coding | 0.176  | 2.324  | 0.020 | -0.163 | -2.387 | 0.017 | 29 |
| ENSG00000163655 | guanine monophosphate synthase [Source:HGNC Symbol;Acc:HGNC:4378]                         | GMPS    | protein_coding | -0.027 | -2.266 | 0.023 | 0.035  | 2.255  | 0.024 | 29 |
| ENSG00000087258 | G protein subunit alpha o1 [Source:HGNC Symbol;Acc:HGNC:4389]                             | GNAO1   | protein_coding | 0.040  | 1.996  | 0.046 | -0.033 | -2.264 | 0.024 | 29 |
| ENSG00000108433 | golgi SNAP receptor complex member 2 [Source:HGNC Symbol;Acc:HGNC:4431]                   | GOSR2   | protein_coding | -0.038 | -2.022 | 0.043 | 0.050  | 3.793  | 0.000 | 29 |
| ENSG00000159592 | GC-rich promoter binding protein 1 like 1 [Source:HGNC Symbol;Acc:HGNC:28843]             | GPBP1L1 | protein_coding | -0.037 | -2.382 | 0.017 | 0.013  | 2.529  | 0.011 | 25 |
| ENSG00000156097 | G protein-coupled receptor 61 [Source:HGNC Symbol;Acc:HGNC:13300]                         | GPR61   | protein_coding | 0.172  | 2.217  | 0.027 | -0.183 | -2.579 | 0.010 | 28 |

|                     |                                                                                               |          |                |        |        |       |        |        |       |    |
|---------------------|-----------------------------------------------------------------------------------------------|----------|----------------|--------|--------|-------|--------|--------|-------|----|
| ENSG0000012390<br>1 | G protein-coupled receptor 83<br>[Source:HGNC<br>Symbol;Acc:HGNC:4523]                        | GPR83    | protein_coding | 0.137  | 2.406  | 0.016 | -0.099 | -1.990 | 0.047 | 28 |
| ENSG0000012567<br>5 | glutamate ionotropic receptor<br>AMPA type subunit 3<br>[Source:HGNC<br>Symbol;Acc:HGNC:4573] | GRIA3    | protein_coding | 0.072  | 2.179  | 0.029 | -0.108 | -2.497 | 0.013 | 32 |
| ENSG0000022831<br>5 | GUSB pseudogene 11<br>[Source:HGNC<br>Symbol;Acc:HGNC:42325]                                  | GUSBP11  | lncRNA         | 0.105  | 2.404  | 0.016 | -0.065 | -2.843 | 0.004 | 26 |
| ENSG0000009203<br>6 | HAUS augmin like complex<br>subunit 4 [Source:HGNC<br>Symbol;Acc:HGNC:20163]                  | HAUS4    | protein_coding | -0.041 | -2.124 | 0.034 | 0.038  | 2.480  | 0.013 | 29 |
| ENSG0000024911<br>5 | HAUS augmin like complex<br>subunit 5 [Source:HGNC<br>Symbol;Acc:HGNC:29130]                  | HAUS5    | protein_coding | 0.112  | 2.836  | 0.005 | -0.070 | -2.964 | 0.003 | 28 |
| ENSG0000016263<br>9 | HEN methyltransferase 1<br>[Source:HGNC<br>Symbol;Acc:HGNC:26400]                             | HENMT1   | protein_coding | -0.083 | -2.742 | 0.006 | 0.104  | 2.909  | 0.004 | 29 |
| ENSG0000016966<br>0 | hexosaminidase D<br>[Source:HGNC<br>Symbol;Acc:HGNC:26307]                                    | HEXD     | protein_coding | 0.076  | 2.328  | 0.020 | -0.035 | -2.193 | 0.028 | 25 |
| ENSG0000016412<br>0 | 15-hydroxyprostaglandin<br>dehydrogenase [Source:HGNC<br>Symbol;Acc:HGNC:5154]                | HPGD     | protein_coding | -0.097 | -2.205 | 0.027 | 0.162  | 3.025  | 0.002 | 30 |
| ENSG0000017892<br>2 | hydroxypyruvate isomerase<br>(putative) [Source:HGNC<br>Symbol;Acc:HGNC:26948]                | HYI      | protein_coding | -0.058 | -2.057 | 0.040 | 0.057  | 3.382  | 0.001 | 28 |
| ENSG0000024424<br>2 | interferon induced<br>transmembrane protein 10<br>[Source:HGNC<br>Symbol;Acc:HGNC:40022]      | IFITM10  | protein_coding | 0.140  | 2.381  | 0.017 | -0.162 | -2.105 | 0.035 | 28 |
| ENSG0000012858<br>1 | intraflagellar transport 22<br>[Source:HGNC<br>Symbol;Acc:HGNC:21895]                         | IFT22    | protein_coding | -0.039 | -2.937 | 0.003 | 0.030  | 2.505  | 0.012 | 29 |
| ENSG0000021197<br>0 | immunoglobulin heavy variable<br>4-61 [Source:HGNC<br>Symbol;Acc:HGNC:5655]                   | IGHV4-61 | IG_V_gene      | -0.148 | -2.152 | 0.031 | 0.206  | 2.787  | 0.005 | 30 |
| ENSG0000024411<br>6 | immunoglobulin kappa variable<br>2-28 [Source:HGNC<br>Symbol;Acc:HGNC:5783]                   | IGKV2-28 | IG_V_gene      | -0.228 | -2.054 | 0.040 | 0.398  | 2.484  | 0.013 | 32 |
| ENSG0000013447<br>0 | interleukin 15 receptor subunit<br>alpha [Source:HGNC<br>Symbol;Acc:HGNC:5978]                | IL15RA   | protein_coding | 0.072  | 2.361  | 0.018 | -0.040 | -2.321 | 0.020 | 25 |



|                 |                                                                                                 |           |                      |        |        |       |        |        |       |    |
|-----------------|-------------------------------------------------------------------------------------------------|-----------|----------------------|--------|--------|-------|--------|--------|-------|----|
| ENSG0000081148  | interphotoreceptor matrix proteoglycan 2 [Source:HGNC Symbol;Acc:HGNC:18362]                    | IMPG2     | protein_coding       | -0.093 | -2.069 | 0.039 | 0.060  | 2.908  | 0.004 | 26 |
| ENSG00000151689 | inositol polyphosphate-1-phosphatase [Source:HGNC Symbol;Acc:HGNC:6071]                         | INPP1     | protein_coding       | -0.037 | -2.037 | 0.042 | 0.029  | 2.260  | 0.024 | 29 |
| ENSG00000169896 | integrin subunit alpha M [Source:HGNC Symbol;Acc:HGNC:6149]                                     | ITGAM     | protein_coding       | 0.149  | 3.388  | 0.001 | -0.057 | -3.093 | 0.002 | 26 |
| ENSG00000123700 | potassium inwardly rectifying channel subfamily J member 2 [Source:HGNC Symbol;Acc:HGNC:6263]   | KCNJ2     | protein_coding       | -0.142 | -2.409 | 0.016 | 0.060  | 2.625  | 0.009 | 25 |
| ENSG00000267365 | KCNJ2 antisense RNA 1 [Source:HGNC Symbol;Acc:HGNC:43720]                                       | KCNJ2-AS1 | lncRNA               | -0.117 | -2.057 | 0.040 | 0.073  | 3.476  | 0.001 | 27 |
| ENSG00000155666 | lysine demethylase 8 [Source:HGNC Symbol;Acc:HGNC:25840]                                        | KDM8      | protein_coding       | -0.085 | -2.103 | 0.035 | 0.078  | 2.934  | 0.003 | 28 |
| ENSG00000110427 | KIAA1549 like [Source:HGNC Symbol;Acc:HGNC:24836]                                               | KIAA1549L | protein_coding       | 0.272  | 3.271  | 0.001 | -0.132 | -2.755 | 0.006 | 26 |
| ENSG00000165185 | KIAA1958 [Source:HGNC Symbol;Acc:HGNC:23427]                                                    | KIAA1958  | protein_coding       | -0.090 | -2.829 | 0.005 | 0.084  | 3.857  | 0.000 | 28 |
| ENSG00000174010 | kelch like family member 15 [Source:HGNC Symbol;Acc:HGNC:29347]                                 | KLHL15    | protein_coding       | -0.099 | -3.813 | 0.000 | 0.057  | 2.844  | 0.004 | 26 |
| ENSG00000114796 | kelch like family member 24 [Source:HGNC Symbol;Acc:HGNC:25947]                                 | KLHL24    | protein_coding       | -0.037 | -2.774 | 0.006 | 0.024  | 2.077  | 0.038 | 27 |
| ENSG00000230658 | KLHL7 divergent transcript [Source:HGNC Symbol;Acc:HGNC:43431]                                  | KLHL7-DT  | lncRNA               | -0.279 | -3.088 | 0.002 | 0.078  | 2.141  | 0.032 | 26 |
| ENSG00000170484 | keratin 74 [Source:HGNC Symbol;Acc:HGNC:28929]                                                  | KRT74     | protein_coding       | -0.150 | -2.101 | 0.036 | 0.573  | 2.787  | 0.005 | 32 |
| ENSG00000137944 | kynurenine aminotransferase 3 [Source:HGNC Symbol;Acc:HGNC:33238]                               | KYAT3     | protein_coding       | -0.050 | -2.300 | 0.021 | 0.052  | 2.433  | 0.015 | 30 |
| ENSG00000188186 | late endosomal/lysosomal adaptor, MAPK and MTOR activator 4 [Source:HGNC Symbol;Acc:HGNC:33772] | LAMTOR4   | protein_coding       | -0.022 | -2.436 | 0.015 | 0.053  | 4.332  | 0.000 | 32 |
| ENSG00000236090 | lactate dehydrogenase A pseudogene 3 [Source:HGNC Symbol;Acc:HGNC:6538]                         | LDHAP3    | processed_pseudogene | -0.175 | -2.095 | 0.036 | 0.096  | 2.166  | 0.030 | 26 |

|                 |                                                                                              |           |                |        |        |       |        |        |       |    |
|-----------------|----------------------------------------------------------------------------------------------|-----------|----------------|--------|--------|-------|--------|--------|-------|----|
| ENSG00000223935 | LGALSL divergent transcript [Source:HGNC Symbol;Acc:HGNC:53951]                              | LGALSL-DT | lncRNA         | 0.105  | 2.596  | 0.009 | -0.409 | -3.414 | 0.001 | 32 |
| ENSG00000050405 | LIM domain and actin binding 1 [Source:HGNC Symbol;Acc:HGNC:24636]                           | LIMA1     | protein_coding | 0.080  | 2.246  | 0.025 | -0.016 | -2.159 | 0.031 | 24 |
| ENSG00000148943 | lin-7 homolog C, crumbs cell polarity complex component [Source:HGNC Symbol;Acc:HGNC:17789]  | LIN7C     | protein_coding | -0.029 | -2.115 | 0.034 | 0.026  | 2.026  | 0.043 | 28 |
| ENSG00000223685 | long intergenic non-protein coding RNA 571 [Source:HGNC Symbol;Acc:HGNC:43721]               | LINC00571 | lncRNA         | -0.137 | -2.796 | 0.005 | 0.107  | 3.486  | 0.000 | 28 |
| ENSG00000223546 | long intergenic non-protein coding RNA 630 [Source:HGNC Symbol;Acc:HGNC:44263]               | LINC00630 | lncRNA         | 0.248  | 5.960  | 0.000 | -0.021 | -2.093 | 0.036 | 24 |
| ENSG00000281852 | long intergenic non-protein coding RNA 891 [Source:HGNC Symbol;Acc:HGNC:48577]               | LINC00891 | lncRNA         | -0.087 | -2.084 | 0.037 | 0.030  | 1.999  | 0.046 | 25 |
| ENSG00000235314 | long intergenic non-protein coding RNA 957 [Source:HGNC Symbol;Acc:HGNC:22332]               | LINC00957 | lncRNA         | -0.083 | -2.562 | 0.010 | 0.021  | 2.039  | 0.041 | 24 |
| ENSG00000261617 | long intergenic non-protein coding RNA 2177 [Source:HGNC Symbol;Acc:HGNC:53039]              | LINC02177 | lncRNA         | -0.194 | -1.966 | 0.049 | 0.102  | 2.123  | 0.034 | 26 |
| ENSG00000235160 | long intergenic non-protein coding RNA 2248 [Source:HGNC Symbol;Acc:HGNC:53147]              | LINC02248 | lncRNA         | -0.073 | -2.045 | 0.041 | 0.027  | 2.296  | 0.022 | 27 |
| ENSG00000251432 | long intergenic non-protein coding RNA 2615 [Source:HGNC Symbol;Acc:HGNC:53402]              | LINC02615 | lncRNA         | 0.106  | 2.214  | 0.027 | -0.134 | -2.049 | 0.040 | 30 |
| ENSG00000198121 | lysophosphatidic acid receptor 1 [Source:HGNC Symbol;Acc:HGNC:3166]                          | LPAR1     | protein_coding | -0.035 | -2.648 | 0.008 | 0.059  | 5.651  | 0.000 | 32 |
| ENSG00000148356 | leucine rich repeat and sterile alpha motif containing 1 [Source:HGNC Symbol;Acc:HGNC:25135] | LRSAM1    | protein_coding | 0.036  | 2.159  | 0.031 | -0.032 | -2.162 | 0.031 | 29 |
| ENSG00000180660 | mab-21 like 1 [Source:HGNC Symbol;Acc:HGNC:6757]                                             | MAB21L1   | protein_coding | 0.062  | 2.085  | 0.037 | -0.221 | -2.657 | 0.008 | 32 |
| ENSG00000139625 | mitogen-activated protein kinase kinase kinase 12                                            | MAP3K12   | protein_coding | 0.055  | 2.577  | 0.010 | -0.073 | -3.675 | 0.000 | 29 |

|                     |                                                                                                  |         |                |        |        |       |        |        |       |    |
|---------------------|--------------------------------------------------------------------------------------------------|---------|----------------|--------|--------|-------|--------|--------|-------|----|
|                     | [Source:HGNC<br>Symbol;Acc:HGNC:6851]                                                            |         |                |        |        |       |        |        |       |    |
| ENSG0000015687<br>5 | major facilitator superfamily<br>domain containing 14A<br>[Source:HGNC<br>Symbol;Acc:HGNC:23363] | MFSD14A | protein_coding | -0.034 | -2.177 | 0.029 | 0.022  | 2.253  | 0.024 | 28 |
| ENSG0000015488<br>9 | metallophosphoesterase 1<br>[Source:HGNC<br>Symbol;Acc:HGNC:15988]                               | MPPE1   | protein_coding | 0.046  | 2.046  | 0.041 | -0.025 | -2.504 | 0.012 | 28 |
| ENSG0000019872<br>7 | mitochondrially encoded<br>cytochrome b [Source:HGNC<br>Symbol;Acc:HGNC:7427]                    | MT-CYB  | protein_coding | 0.056  | 2.485  | 0.013 | -0.030 | -2.170 | 0.030 | 26 |
| ENSG0000013293<br>8 | microtubule associated scaffold<br>protein 2 [Source:HGNC<br>Symbol;Acc:HGNC:20595]              | MTUS2   | protein_coding | 0.034  | 2.135  | 0.033 | -0.025 | -1.961 | 0.050 | 29 |
| ENSG0000020527<br>7 | mucin 12, cell surface<br>associated [Source:HGNC<br>Symbol;Acc:HGNC:7510]                       | MUC12   | protein_coding | -0.240 | -2.255 | 0.024 | 0.388  | 3.648  | 0.000 | 30 |
| ENSG0000001336<br>4 | major vault protein<br>[Source:HGNC<br>Symbol;Acc:HGNC:7531]                                     | MVP     | protein_coding | 0.042  | 2.057  | 0.040 | -0.029 | -1.962 | 0.050 | 27 |
| ENSG0000015150<br>3 | non-SMC condensin II complex<br>subunit D3 [Source:HGNC<br>Symbol;Acc:HGNC:28952]                | NCAPD3  | protein_coding | -0.080 | -2.090 | 0.037 | 0.041  | 2.749  | 0.006 | 28 |
| ENSG0000011670<br>1 | neutrophil cytosolic factor 2<br>[Source:HGNC<br>Symbol;Acc:HGNC:7661]                           | NCF2    | protein_coding | -0.069 | -2.871 | 0.004 | 0.109  | 2.438  | 0.015 | 31 |
| ENSG0000014591<br>2 | NHP2 ribonucleoprotein<br>[Source:HGNC<br>Symbol;Acc:HGNC:14377]                                 | NHP2    | protein_coding | -0.047 | -3.112 | 0.002 | 0.030  | 2.838  | 0.005 | 28 |
| ENSG0000004816<br>2 | NOP16 nucleolar protein<br>[Source:HGNC<br>Symbol;Acc:HGNC:26934]                                | NOP16   | protein_coding | 0.061  | 3.355  | 0.001 | -0.037 | -2.866 | 0.004 | 29 |
| ENSG0000018555<br>1 | nuclear receptor subfamily 2<br>group F member 2<br>[Source:HGNC<br>Symbol;Acc:HGNC:7976]        | NR2F2   | protein_coding | 0.018  | 2.178  | 0.029 | -0.038 | -2.568 | 0.010 | 32 |
| ENSG0000017991<br>5 | neurexin 1 [Source:HGNC<br>Symbol;Acc:HGNC:8008]                                                 | NRXN1   | protein_coding | -0.075 | -2.125 | 0.034 | 0.039  | 2.334  | 0.020 | 25 |
| ENSG0000017359<br>8 | nudix hydrolase 4<br>[Source:HGNC<br>Symbol;Acc:HGNC:8051]                                       | NUDT4   | protein_coding | -0.057 | -2.542 | 0.011 | 0.021  | 2.317  | 0.021 | 25 |
| ENSG0000011133<br>1 | 2'-5'-oligoadenylate synthetase<br>3 [Source:HGNC<br>Symbol;Acc:HGNC:8088]                       | OAS3    | protein_coding | 0.062  | 2.164  | 0.030 | -0.074 | -2.216 | 0.027 | 28 |

|                 |                                                                                     |            |                        |        |        |       |        |        |       |    |
|-----------------|-------------------------------------------------------------------------------------|------------|------------------------|--------|--------|-------|--------|--------|-------|----|
| ENSG00000116774 | olfactomedin like 3<br>[Source:HGNC Symbol;Acc:HGNC:24956]                          | OLFML3     | protein_coding         | -0.040 | -2.043 | 0.041 | 0.027  | 2.016  | 0.044 | 29 |
| ENSG00000083093 | partner and localizer of BRCA2<br>[Source:HGNC Symbol;Acc:HGNC:26144]               | PALB2      | protein_coding         | -0.061 | -2.462 | 0.014 | 0.023  | 2.090  | 0.037 | 26 |
| ENSG00000100105 | POZ/BTB and AT hook containing zinc finger 1<br>[Source:HGNC Symbol;Acc:HGNC:13071] | PATZ1      | protein_coding         | 0.020  | 2.096  | 0.036 | -0.039 | -2.541 | 0.011 | 32 |
| ENSG00000204304 | PBX homeobox 2<br>[Source:HGNC Symbol;Acc:HGNC:8633]                                | PBX2       | protein_coding         | 0.021  | 2.182  | 0.029 | -0.020 | -2.286 | 0.022 | 32 |
| ENSG00000224729 | PCOLCE antisense RNA 1<br>[Source:HGNC Symbol;Acc:HGNC:40430]                       | PCOLCE-AS1 | lncRNA                 | 0.135  | 2.145  | 0.032 | -0.106 | -2.189 | 0.029 | 29 |
| ENSG00000115257 | proprotein convertase subtilisin/kexin type 4<br>[Source:HGNC Symbol;Acc:HGNC:8746] | PCSK4      | protein_coding         | 0.209  | 2.298  | 0.022 | -0.081 | -2.282 | 0.022 | 25 |
| ENSG00000184588 | phosphodiesterase 4B<br>[Source:HGNC Symbol;Acc:HGNC:8781]                          | PDE4B      | protein_coding         | -0.040 | -2.055 | 0.040 | 0.093  | 3.034  | 0.002 | 30 |
| ENSG00000229828 | PDE4DIP pseudogene 1<br>[Source:HGNC Symbol;Acc:HGNC:50867]                         | PDE4DIPP1  | unprocessed_pseudogene | 0.247  | 2.339  | 0.019 | -0.305 | -2.827 | 0.005 | 28 |
| ENSG00000088356 | p53 and DNA damage regulated 1<br>[Source:HGNC Symbol;Acc:HGNC:16119]               | PDRG1      | protein_coding         | 0.032  | 2.167  | 0.030 | -0.082 | -2.017 | 0.044 | 32 |
| ENSG00000172367 | PDZ domain containing 3<br>[Source:HGNC Symbol;Acc:HGNC:19891]                      | PDZD3      | protein_coding         | 0.382  | 2.184  | 0.029 | -0.198 | -2.034 | 0.042 | 26 |
| ENSG00000142655 | peroxisomal biogenesis factor 14<br>[Source:HGNC Symbol;Acc:HGNC:8856]              | PEX14      | protein_coding         | 0.056  | 1.970  | 0.049 | -0.022 | -2.763 | 0.006 | 26 |
| ENSG00000204220 | prefoldin subunit 6<br>[Source:HGNC Symbol;Acc:HGNC:4926]                           | PFDN6      | protein_coding         | -0.074 | -2.811 | 0.005 | 0.050  | 2.726  | 0.006 | 27 |
| ENSG00000103066 | phospholipase A2 group XV<br>[Source:HGNC Symbol;Acc:HGNC:17163]                    | PLA2G15    | protein_coding         | 0.033  | 2.294  | 0.022 | -0.046 | -2.650 | 0.008 | 27 |
| ENSG00000189266 | proline rich nuclear receptor coactivator 2<br>[Source:HGNC Symbol;Acc:HGNC:23158]  | PNRC2      | protein_coding         | -0.020 | -2.365 | 0.018 | 0.042  | 3.369  | 0.001 | 30 |

|                 |                                                                                  |          |                                  |        |        |       |        |        |       |    |
|-----------------|----------------------------------------------------------------------------------|----------|----------------------------------|--------|--------|-------|--------|--------|-------|----|
| ENSG00000105568 | protein phosphatase 2 scaffold subunit Aalpha [Source:HGNC Symbol;Acc:HGNC:9302] | PPP2R1A  | protein_coding                   | -0.034 | -2.310 | 0.021 | 0.018  | 2.034  | 0.042 | 26 |
| ENSG00000138738 | PR/SET domain 5 [Source:HGNC Symbol;Acc:HGNC:9349]                               | PRDM5    | protein_coding                   | -0.084 | -2.881 | 0.004 | 0.031  | 2.072  | 0.038 | 27 |
| ENSG00000204540 | psoriasis susceptibility 1 candidate 1 [Source:HGNC Symbol;Acc:HGNC:17202]       | PSORS1C1 | protein_coding                   | 0.183  | 2.085  | 0.037 | -0.075 | -2.113 | 0.035 | 28 |
| ENSG00000134222 | proline and serine rich coiled-coil 1 [Source:HGNC Symbol;Acc:HGNC:24472]        | PSRC1    | protein_coding                   | 0.069  | 2.553  | 0.011 | -0.118 | -4.530 | 0.000 | 31 |
| ENSG00000185920 | patched 1 [Source:HGNC Symbol;Acc:HGNC:9585]                                     | PTCH1    | protein_coding                   | 0.058  | 2.134  | 0.033 | -0.102 | -2.557 | 0.011 | 31 |
| ENSG00000237984 | phosphatase and tensin homolog pseudogene 1 [Source:HGNC Symbol;Acc:HGNC:9589]   | PTENP1   | transcribed_processed_pseudogene | -0.106 | -2.322 | 0.020 | 0.114  | 3.504  | 0.000 | 28 |
| ENSG00000099246 | RAB18, member RAS oncogene family [Source:HGNC Symbol;Acc:HGNC:14244]            | RAB18    | protein_coding                   | -0.034 | -2.695 | 0.007 | 0.014  | 2.310  | 0.021 | 26 |
| ENSG00000172007 | RAB33B, member RAS oncogene family [Source:HGNC Symbol;Acc:HGNC:16075]           | RAB33B   | protein_coding                   | -0.055 | -2.425 | 0.015 | 0.034  | 5.120  | 0.000 | 26 |
| ENSG00000136144 | RCC1 and BTB domain containing protein 1 [Source:HGNC Symbol;Acc:HGNC:18243]     | RCBTB1   | protein_coding                   | 0.026  | 2.043  | 0.041 | -0.024 | -2.551 | 0.011 | 29 |
| ENSG00000159788 | regulator of G protein signaling 12 [Source:HGNC Symbol;Acc:HGNC:9994]           | RGS12    | protein_coding                   | 0.086  | 3.538  | 0.000 | -0.049 | -2.477 | 0.013 | 28 |
| ENSG00000091844 | regulator of G protein signaling 17 [Source:HGNC Symbol;Acc:HGNC:14088]          | RGS17    | protein_coding                   | -0.122 | -2.325 | 0.020 | 0.142  | 2.405  | 0.016 | 29 |
| ENSG00000229927 | RHEB pseudogene 1 [Source:HGNC Symbol;Acc:HGNC:10010]                            | RHEBP1   | processed_pseudogene             | 0.244  | 2.712  | 0.007 | -0.284 | -3.427 | 0.001 | 28 |
| ENSG00000140983 | ras homolog family member T2 [Source:HGNC Symbol;Acc:HGNC:21169]                 | RHOT2    | protein_coding                   | 0.046  | 2.651  | 0.008 | -0.071 | -2.912 | 0.004 | 29 |
| ENSG00000255794 | rhabdomyosarcoma 2 associated transcript [Source:HGNC Symbol;Acc:HGNC:29893]     | RMST     | lncRNA                           | -0.107 | -2.226 | 0.026 | 0.055  | 2.594  | 0.009 | 28 |

|                     |                                                                                       |           |                |        |        |       |        |        |       |    |
|---------------------|---------------------------------------------------------------------------------------|-----------|----------------|--------|--------|-------|--------|--------|-------|----|
| ENSG0000026572<br>7 | RNA, 7SL, cytoplasmic 648, pseudogene [Source:HGNC Symbol;Acc:HGNC:46664]             | RN7SL648P | misc_RNA       | 0.123  | 1.979  | 0.048 | -0.082 | -2.357 | 0.018 | 26 |
| ENSG0000013387<br>4 | ring finger protein 122 [Source:HGNC Symbol;Acc:HGNC:21147]                           | RNF122    | protein_coding | -0.038 | -1.973 | 0.049 | 0.067  | 1.990  | 0.047 | 28 |
| ENSG0000015413<br>3 | roundabout guidance receptor 4 [Source:HGNC Symbol;Acc:HGNC:17985]                    | ROBO4     | protein_coding | 0.061  | 2.200  | 0.028 | -0.061 | -2.235 | 0.025 | 28 |
| ENSG0000010031<br>6 | ribosomal protein L3 [Source:HGNC Symbol;Acc:HGNC:10332]                              | RPL3      | protein_coding | -0.025 | -2.644 | 0.008 | 0.025  | 2.764  | 0.006 | 29 |
| ENSG0000017444<br>4 | ribosomal protein L4 [Source:HGNC Symbol;Acc:HGNC:10353]                              | RPL4      | protein_coding | -0.028 | -2.526 | 0.012 | 0.019  | 2.127  | 0.033 | 29 |
| ENSG0000008900<br>9 | ribosomal protein L6 [Source:HGNC Symbol;Acc:HGNC:10362]                              | RPL6      | protein_coding | -0.016 | -2.321 | 0.020 | 0.016  | 2.021  | 0.043 | 29 |
| ENSG0000016020<br>8 | ribosomal RNA processing 1B [Source:HGNC Symbol;Acc:HGNC:23818]                       | RRP1B     | protein_coding | -0.048 | -2.913 | 0.004 | 0.017  | 2.667  | 0.008 | 26 |
| ENSG0000013432<br>1 | radical S-adenosyl methionine domain containing 2 [Source:HGNC Symbol;Acc:HGNC:30908] | RSAD2     | protein_coding | 0.103  | 2.971  | 0.003 | -0.079 | -2.171 | 0.030 | 28 |
| ENSG0000016752<br>4 | ribosomal protein S6 kinase related [Source:HGNC Symbol;Acc:HGNC:26314]               | RSKR      | protein_coding | 0.085  | 2.049  | 0.041 | -0.052 | -2.328 | 0.020 | 29 |
| ENSG0000018255<br>2 | RWD domain containing 4 [Source:HGNC Symbol;Acc:HGNC:23750]                           | RWDD4     | protein_coding | 0.035  | 2.823  | 0.005 | -0.024 | -2.384 | 0.017 | 28 |
| ENSG0000016378<br>5 | receptor like tyrosine kinase [Source:HGNC Symbol;Acc:HGNC:10481]                     | RYK       | protein_coding | -0.072 | -2.830 | 0.005 | 0.018  | 2.079  | 0.038 | 25 |
| ENSG0000024627<br>3 | SBF2 antisense RNA 1 [Source:HGNC Symbol;Acc:HGNC:27438]                              | SBF2-AS1  | lncRNA         | -0.096 | -2.650 | 0.008 | 0.111  | 2.543  | 0.011 | 28 |
| ENSG0000016656<br>2 | SEC11 homolog C, signal peptidase complex subunit [Source:HGNC Symbol;Acc:HGNC:23400] | SEC11C    | protein_coding | -0.054 | -3.153 | 0.002 | 0.025  | 2.145  | 0.032 | 27 |
| ENSG0000016243<br>0 | selenoprotein N [Source:HGNC Symbol;Acc:HGNC:15999]                                   | SELENON   | protein_coding | 0.047  | 2.210  | 0.027 | -0.020 | -2.512 | 0.012 | 25 |

|                 |                                                                                                         |               |                |        |        |       |        |        |       |    |
|-----------------|---------------------------------------------------------------------------------------------------------|---------------|----------------|--------|--------|-------|--------|--------|-------|----|
| ENSG00000197417 | sedoheptulokinase<br>[Source:HGNC<br>Symbol;Acc:HGNC:1492]                                              | SHPK          | protein_coding | 0.084  | 2.976  | 0.003 | -0.030 | -2.312 | 0.021 | 25 |
| ENSG00000204351 | Ski2 like RNA helicase<br>[Source:HGNC<br>Symbol;Acc:HGNC:10898]                                        | SKIV2L        | protein_coding | 0.042  | 2.619  | 0.009 | -0.061 | -2.458 | 0.014 | 30 |
| ENSG00000117090 | signaling lymphocytic activation<br>molecule family member 1<br>[Source:HGNC<br>Symbol;Acc:HGNC:10903]  | SLAMF1        | protein_coding | 0.346  | 3.717  | 0.000 | -0.135 | -2.122 | 0.034 | 26 |
| ENSG00000151012 | solute carrier family 7 member<br>11 [Source:HGNC<br>Symbol;Acc:HGNC:11059]                             | SLC7A11       | protein_coding | -0.139 | -2.700 | 0.007 | 0.109  | 2.683  | 0.007 | 28 |
| ENSG00000137571 | solute carrier organic anion<br>transporter family member 5A1<br>[Source:HGNC<br>Symbol;Acc:HGNC:19046] | SLCO5A1       | protein_coding | 0.040  | 2.048  | 0.041 | -0.053 | -2.367 | 0.018 | 29 |
| ENSG00000213599 | SLX1A-SULT1A3 readthrough<br>(NMD candidate)<br>[Source:HGNC<br>Symbol;Acc:HGNC:44437]                  | SLX1A-SULT1A3 | lncRNA         | 0.248  | 2.067  | 0.039 | -0.210 | -1.960 | 0.050 | 26 |
| ENSG00000170365 | SMAD family member 1<br>[Source:HGNC<br>Symbol;Acc:HGNC:6767]                                           | SMAD1         | protein_coding | 0.088  | 2.263  | 0.024 | -0.071 | -2.621 | 0.009 | 28 |
| ENSG00000198952 | SMG5 nonsense mediated<br>mRNA decay factor<br>[Source:HGNC<br>Symbol;Acc:HGNC:24644]                   | SMG5          | protein_coding | 0.021  | 2.334  | 0.020 | -0.044 | -4.206 | 0.000 | 32 |
| ENSG00000172594 | sphingomyelin<br>phosphodiesterase acid like 3A<br>[Source:HGNC<br>Symbol;Acc:HGNC:17389]               | SMPDL3A       | protein_coding | -0.034 | -2.577 | 0.010 | 0.048  | 2.574  | 0.010 | 32 |
| ENSG00000102172 | spermine synthase<br>[Source:HGNC<br>Symbol;Acc:HGNC:11123]                                             | SMS           | protein_coding | -0.064 | -3.330 | 0.001 | 0.019  | 2.091  | 0.037 | 26 |
| ENSG00000100028 | small nuclear<br>ribonucleoprotein D3<br>polypeptide [Source:HGNC<br>Symbol;Acc:HGNC:11160]             | SNRPD3        | protein_coding | -0.043 | -2.314 | 0.021 | 0.030  | 2.169  | 0.030 | 27 |
| ENSG00000110025 | sorting nexin 15 [Source:HGNC<br>Symbol;Acc:HGNC:14978]                                                 | SNX15         | protein_coding | -0.045 | -2.048 | 0.041 | 0.056  | 2.514  | 0.012 | 29 |
| ENSG00000109610 | superoxide dismutase 3<br>[Source:HGNC<br>Symbol;Acc:HGNC:11181]                                        | SOD3          | protein_coding | 0.045  | 2.078  | 0.038 | -0.042 | -2.947 | 0.003 | 28 |

|                 |                                                                                                      |            |                |        |        |       |        |        |       |    |
|-----------------|------------------------------------------------------------------------------------------------------|------------|----------------|--------|--------|-------|--------|--------|-------|----|
| ENSG0000067066  | SP100 nuclear antigen<br>[Source:HGNC<br>Symbol;Acc:HGNC:11206]                                      | SP100      | protein_coding | 0.031  | 2.612  | 0.009 | -0.016 | -2.406 | 0.016 | 28 |
| ENSG00000122432 | spermatogenesis associated 1<br>[Source:HGNC<br>Symbol;Acc:HGNC:14682]                               | SPATA1     | protein_coding | -0.177 | -3.427 | 0.001 | 0.132  | 2.790  | 0.005 | 28 |
| ENSG00000189419 | spermatogenesis associated 41<br>[Source:HGNC<br>Symbol;Acc:HGNC:48613]                              | SPATA41    | lncRNA         | 0.130  | 2.321  | 0.020 | -0.216 | -2.248 | 0.025 | 28 |
| ENSG00000116096 | sepiapterin reductase<br>[Source:HGNC<br>Symbol;Acc:HGNC:11257]                                      | SPR        | protein_coding | 0.033  | 1.979  | 0.048 | -0.030 | -2.199 | 0.028 | 28 |
| ENSG00000277363 | SRC kinase signaling inhibitor 1<br>[Source:HGNC<br>Symbol;Acc:HGNC:29506]                           | SRCIN1     | protein_coding | -0.115 | -2.177 | 0.029 | 0.123  | 3.402  | 0.001 | 28 |
| ENSG00000008513 | ST3 beta-galactoside alpha-2,3-<br>sialyltransferase 1<br>[Source:HGNC<br>Symbol;Acc:HGNC:10862]     | ST3GAL1    | protein_coding | 0.018  | 2.240  | 0.025 | -0.068 | -5.242 | 0.000 | 32 |
| ENSG00000144057 | ST6 beta-galactoside alpha-2,6-<br>sialyltransferase 2<br>[Source:HGNC<br>Symbol;Acc:HGNC:10861]     | ST6GAL2    | protein_coding | 0.183  | 2.772  | 0.006 | -0.213 | -2.549 | 0.011 | 29 |
| ENSG00000160408 | ST6 N-acetylglucosaminide<br>alpha-2,6-sialyltransferase 6<br>[Source:HGNC<br>Symbol;Acc:HGNC:23364] | ST6GALNAC6 | protein_coding | -0.046 | -3.403 | 0.001 | 0.020  | 2.314  | 0.021 | 28 |
| ENSG00000213533 | STIM activating enhancer<br>[Source:HGNC<br>Symbol;Acc:HGNC:30526]                                   | STIMATE    | protein_coding | 0.156  | 3.778  | 0.000 | -0.048 | -2.353 | 0.019 | 26 |
| ENSG00000162520 | syncollin, intermediate filament<br>protein [Source:HGNC<br>Symbol;Acc:HGNC:28897]                   | SYNC       | protein_coding | 0.058  | 2.365  | 0.018 | -0.039 | -2.381 | 0.017 | 29 |
| ENSG00000177156 | transaldolase 1 [Source:HGNC<br>Symbol;Acc:HGNC:11559]                                               | TALDO1     | protein_coding | -0.023 | -2.168 | 0.030 | 0.042  | 3.088  | 0.002 | 29 |
| ENSG00000138336 | tet methylcytosine dioxygenase<br>1 [Source:HGNC<br>Symbol;Acc:HGNC:29484]                           | TET1       | protein_coding | -0.031 | -2.086 | 0.037 | 0.025  | 2.089  | 0.037 | 28 |
| ENSG00000174796 | THAP domain containing 6<br>[Source:HGNC<br>Symbol;Acc:HGNC:23189]                                   | THAP6      | protein_coding | 0.043  | 2.154  | 0.031 | -0.021 | -1.993 | 0.046 | 28 |
| ENSG00000144229 | thrombospondin type 1<br>domain containing 7B<br>[Source:HGNC<br>Symbol;Acc:HGNC:29348]              | THSD7B     | protein_coding | 0.099  | 2.389  | 0.017 | -0.142 | -2.700 | 0.007 | 32 |



|                 |                                                                                |          |                      |        |        |       |        |        |       |    |
|-----------------|--------------------------------------------------------------------------------|----------|----------------------|--------|--------|-------|--------|--------|-------|----|
| ENSG0000066654  | THUMP domain containing 1 [Source:HGNC Symbol;Acc:HGNC:23807]                  | THUMPD1  | protein_coding       | -0.044 | -2.314 | 0.021 | 0.032  | 2.156  | 0.031 | 28 |
| ENSG00000163659 | TCDD inducible poly(ADP-ribose) polymerase [Source:HGNC Symbol;Acc:HGNC:23696] | TIPARP   | protein_coding       | -0.027 | -2.789 | 0.005 | 0.097  | 2.822  | 0.005 | 32 |
| ENSG00000228828 | tousled like kinase 2 pseudogene 2 [Source:HGNC Symbol;Acc:HGNC:22227]         | TLK2P2   | processed_pseudogene | 0.108  | 2.520  | 0.012 | -0.209 | -3.340 | 0.001 | 32 |
| ENSG00000164124 | transmembrane protein 144 [Source:HGNC Symbol;Acc:HGNC:25633]                  | TMEM144  | protein_coding       | -0.042 | -2.752 | 0.006 | 0.032  | 2.808  | 0.005 | 27 |
| ENSG00000163444 | transmembrane protein 183A [Source:HGNC Symbol;Acc:HGNC:20173]                 | TMEM183A | protein_coding       | 0.066  | 2.038  | 0.042 | -0.020 | -2.656 | 0.008 | 26 |
| ENSG00000187049 | transmembrane protein 216 [Source:HGNC Symbol;Acc:HGNC:25018]                  | TMEM216  | protein_coding       | -0.063 | -2.281 | 0.023 | 0.063  | 2.364  | 0.018 | 31 |
| ENSG00000205084 | transmembrane protein 231 [Source:HGNC Symbol;Acc:HGNC:37234]                  | TMEM231  | protein_coding       | -0.074 | -2.893 | 0.004 | 0.062  | 3.333  | 0.001 | 29 |
| ENSG00000134490 | transmembrane protein 241 [Source:HGNC Symbol;Acc:HGNC:31723]                  | TMEM241  | protein_coding       | 0.110  | 2.376  | 0.018 | -0.095 | -2.965 | 0.003 | 28 |
| ENSG00000182087 | transmembrane protein 259 [Source:HGNC Symbol;Acc:HGNC:17039]                  | TMEM259  | protein_coding       | 0.034  | 3.097  | 0.002 | -0.012 | -2.021 | 0.043 | 25 |
| ENSG00000121858 | TNF superfamily member 10 [Source:HGNC Symbol;Acc:HGNC:11925]                  | TNFSF10  | protein_coding       | 0.047  | 2.603  | 0.009 | -0.038 | -2.377 | 0.017 | 28 |
| ENSG00000118194 | troponin T2, cardiac type [Source:HGNC Symbol;Acc:HGNC:11949]                  | TNNT2    | protein_coding       | -0.047 | -2.064 | 0.039 | 0.027  | 2.082  | 0.037 | 25 |
| ENSG00000111077 | tensin 2 [Source:HGNC Symbol;Acc:HGNC:19737]                                   | TNS2     | protein_coding       | 0.069  | 2.118  | 0.034 | -0.027 | -1.978 | 0.048 | 26 |
| ENSG00000177302 | DNA topoisomerase III alpha [Source:HGNC Symbol;Acc:HGNC:11992]                | TOP3A    | protein_coding       | -0.073 | -2.714 | 0.007 | 0.072  | 3.268  | 0.001 | 28 |
| ENSG00000166166 | tRNA methyltransferase 61A [Source:HGNC Symbol;Acc:HGNC:23790]                 | TRMT61A  | protein_coding       | -0.047 | -2.395 | 0.017 | 0.039  | 2.291  | 0.022 | 28 |
| ENSG00000179981 | teashirt zinc finger homeobox 1 [Source:HGNC Symbol;Acc:HGNC:10669]            | TSHZ1    | protein_coding       | 0.029  | 2.041  | 0.041 | -0.027 | -1.985 | 0.047 | 29 |

|                 |                                                                                                                              |          |                                    |        |        |       |        |        |       |    |
|-----------------|------------------------------------------------------------------------------------------------------------------------------|----------|------------------------------------|--------|--------|-------|--------|--------|-------|----|
| ENSG00000160803 | ubiquilin 4 [Source:HGNC Symbol;Acc:HGNC:1237]                                                                               | UBQLN4   | protein_coding                     | 0.023  | 2.140  | 0.032 | -0.053 | -3.550 | 0.000 | 32 |
| ENSG00000175970 | unc-119 lipid binding chaperone B [Source:HGNC Symbol;Acc:HGNC:16488]                                                        | UNC119B  | protein_coding                     | 0.046  | 2.336  | 0.019 | -0.021 | -1.986 | 0.047 | 26 |
| ENSG00000132478 | unk zinc finger [Source:HGNC Symbol;Acc:HGNC:29369]                                                                          | UNK      | protein_coding                     | 0.048  | 2.024  | 0.043 | -0.027 | -2.183 | 0.029 | 27 |
| ENSG00000169062 | UPF3A regulator of nonsense mediated mRNA decay [Source:HGNC Symbol;Acc:HGNC:20332]                                          | UPF3A    | protein_coding                     | 0.029  | 1.983  | 0.047 | -0.040 | -1.987 | 0.047 | 32 |
| ENSG00000136878 | ubiquitin specific peptidase 20 [Source:HGNC Symbol;Acc:HGNC:12619]                                                          | USP20    | protein_coding                     | 0.060  | 2.276  | 0.023 | -0.027 | -2.252 | 0.024 | 26 |
| ENSG00000234769 | WASP family homolog 4, pseudogene [Source:HGNC Symbol;Acc:HGNC:14126]                                                        | WASH4P   | unprocessed_pseudogene             | -0.326 | -3.616 | 0.000 | 0.163  | 2.890  | 0.004 | 27 |
| ENSG00000164961 | WASH complex subunit 5 [Source:HGNC Symbol;Acc:HGNC:28984]                                                                   | WASHC5   | protein_coding                     | 0.071  | 2.519  | 0.012 | -0.042 | -2.585 | 0.010 | 28 |
| ENSG00000248334 | WAS protein homolog associated with actin, golgi membranes and microtubules pseudogene 2 [Source:HGNC Symbol;Acc:HGNC:32360] | WHAMMP2  | transcribed_unprocessed_pseudogene | 0.074  | 2.566  | 0.010 | -0.062 | -2.701 | 0.007 | 28 |
| ENSG00000152422 | X-ray repair cross complementing 4 [Source:HGNC Symbol;Acc:HGNC:12831]                                                       | XRCC4    | protein_coding                     | 0.051  | 2.884  | 0.004 | -0.037 | -2.044 | 0.041 | 29 |
| ENSG00000239407 | novel transcript                                                                                                             | Z68871.1 | lncRNA                             | -0.132 | -3.035 | 0.002 | 0.034  | 1.971  | 0.049 | 25 |
| ENSG00000166707 | zinc finger CCHC-type containing 18 [Source:HGNC Symbol;Acc:HGNC:32459]                                                      | ZCCHC18  | protein_coding                     | -0.166 | -1.998 | 0.046 | 0.153  | 2.229  | 0.026 | 29 |
| ENSG00000160445 | zyg-11 related cell cycle regulator [Source:HGNC Symbol;Acc:HGNC:30960]                                                      | ZER1     | protein_coding                     | 0.037  | 2.250  | 0.024 | -0.018 | -2.405 | 0.016 | 26 |
| ENSG00000066827 | zinc finger and AT-hook domain containing [Source:HGNC Symbol;Acc:HGNC:19899]                                                | ZFAT     | protein_coding                     | 0.057  | 2.029  | 0.042 | -0.033 | -2.076 | 0.038 | 27 |
| ENSG00000275111 | zinc finger protein 2 [Source:HGNC Symbol;Acc:HGNC:12991]                                                                    | ZNF2     | protein_coding                     | -0.075 | -2.204 | 0.028 | 0.046  | 2.863  | 0.004 | 27 |

|                     |                                                                                 |                             |                |        |              |       |        |              |              |    |
|---------------------|---------------------------------------------------------------------------------|-----------------------------|----------------|--------|--------------|-------|--------|--------------|--------------|----|
| ENSG0000016626<br>1 | zinc finger protein 202<br>[Source:HGNC<br>Symbol;Acc:HGNC:12994]               | ZNF202                      | protein_coding | -0.058 | -1.971       | 0.049 | 0.090  | 2.635        | 0.008        | 30 |
| ENSG0000019802<br>6 | zinc finger protein 335<br>[Source:HGNC<br>Symbol;Acc:HGNC:15807]               | ZNF335                      | protein_coding | 0.030  | 2.648        | 0.008 | -0.049 | -2.581       | 0.010        | 32 |
| ENSG0000019859<br>7 | zinc finger protein 536<br>[Source:HGNC<br>Symbol;Acc:HGNC:29025]               | ZNF536                      | protein_coding | 0.060  | 2.325        | 0.020 | -0.094 | -2.165       | 0.030        | 30 |
| ENSG0000017822<br>9 | zinc finger protein 543<br>[Source:HGNC<br>Symbol;Acc:HGNC:25281]               | ZNF543                      | protein_coding | -0.029 | -2.066       | 0.039 | 0.026  | 2.346        | 0.019        | 28 |
| ENSG0000023084<br>4 | ZNF674 antisense RNA 1 (head<br>to head) [Source:HGNC<br>Symbol;Acc:HGNC:44266] | ZNF674-AS1                  | lncRNA         | -0.095 | -2.285       | 0.022 | 0.044  | 2.225        | 0.026        | 26 |
| Metabolites         |                                                                                 | a-ketoglutarate             | metabolite     | -0.049 | -0.787       | 0.431 | 0.045  | 1.408        | 0.159        | 29 |
|                     |                                                                                 | Carnitine C12               | metabolite     | 0.018  | 0.131        | 0.896 | 0.077  | 2.195        | <b>0.028</b> | 25 |
|                     |                                                                                 | Carnitine C14:1             | metabolite     | 0.020  | 0.233        | 0.816 | 0.089  | 2.791        | <b>0.005</b> | 25 |
|                     |                                                                                 | Carnitine C16               | metabolite     | 0.041  | 0.933        | 0.351 | 0.177  | 4.782        | <b>0.000</b> | 32 |
|                     |                                                                                 | Carnitine C16-<br>OH        | metabolite     | 0.042  | 1.102        | 0.270 | 0.169  | 1.693        | 0.090        | 32 |
|                     |                                                                                 | Carnitine C18               | metabolite     | 0.076  | 0.747        | 0.455 | 0.067  | 2.672        | <b>0.008</b> | 25 |
|                     |                                                                                 | Carnitine C18-<br>OH        | metabolite     | -0.055 | -0.575       | 0.565 | 0.086  | 2.467        | <b>0.014</b> | 24 |
|                     |                                                                                 | Carnitine C18:1             | metabolite     | 0.043  | 0.451        | 0.652 | 0.053  | 1.591        | 0.112        | 26 |
|                     |                                                                                 | Carnitine C18:1-<br>OH      | metabolite     | -0.008 | -0.080       | 0.936 | 0.094  | 3.605        | <b>0.000</b> | 24 |
|                     |                                                                                 | Carnitine C18:2             | metabolite     | 0.059  | 0.625        | 0.532 | 0.040  | 1.042        | 0.297        | 26 |
|                     |                                                                                 | Carnitine C18:2-<br>OH      | metabolite     | 0.047  | 1.104        | 0.270 | 0.224  | 3.257        | <b>0.001</b> | 32 |
|                     |                                                                                 | Glutarylcarnitine<br>(C5DC) | metabolite     | -0.024 | -0.163       | 0.871 | 0.062  | 1.484        | 0.138        | 25 |
|                     |                                                                                 | Carnitine C8:1              | metabolite     | 0.063  | 1.095        | 0.273 | 0.027  | 0.359        | 0.719        | 30 |
|                     | Ribose-5-<br>phosphate                                                          | metabolite                  | 0.124          | 2.138  | <b>0.033</b> | 0.218 | 2.416  | <b>0.016</b> | 32           |    |

Table S3 - Pre- and Post-operative characteristics in samples with transcriptomics and metabolomics analyses. (\*) - Tests among BMI groups were conducted by exact test for categorical variables, and ANOVA or non-parametric Kruskal-Wallis test for continuous variables. Data are presented as n (%) for categorical variables and mean (SD) or median (IQR) for continuous variables. Abbreviations: ACE – Angiotensin Converting Enzyme; AKI – Acute Kidney Injury; BMI – Body Mass Index; CABG – Coronary artery Bypass Grafting; CCS – Canadian Cardiovascular Society; Hct – Haematocrit; FiO2 – Fraction of Inspired Oxygen; KDIGO - The Kidney Disease Improving Global Outcomes; MABP – Mean Arterial Blood Pressure; MODS – Multiorgan Dysfunction Syndrome; NYHA – New York Heart Association; PO2 – Partial Pressure of Oxygen; RBC – Red Blood Cells; VD – Vessel Disease.

| Subset (n=60)                             | BMI<25 (n=16) | 25≥BMI≤32 (n=33) | BMI>32 (n=11)  | p-value | Missing data (n) |
|-------------------------------------------|---------------|------------------|----------------|---------|------------------|
| Age (years) - Median (1st - 3rd quartile) | 67 (62 - 75)  | 67 (61.8 - 74)   | 60 (54 - 67.5) | 0.415   | 0                |
| Sex (male) - n (%)                        | 14 (88%)      | 28 (85%)         | 10 (91%)       | 1.000   | 0                |
| Ethnic (White) - n (%)                    | 14 (88%)      | 28 (85%)         | 10 (91%)       | 0.336   | 0                |
| BMI                                       | 67 (62 - 75)  | 67 (61.8 - 74)   | 60 (54 - 67.5) | <0.001  | 0                |
| Smoking History                           |               |                  |                |         |                  |
| Never smoker - n (%)                      | 6 (38%)       | 14 (42%)         | 4 (36%)        | 0.944   | 0                |
| Ex-smoker - n (%)                         | 8 (50%)       | 16 (48%)         | 5 (45%)        |         |                  |
| Current smoker - n (%)                    | 2 (12%)       | 3 (9%)           | 2 (18%)        |         |                  |
| <b>Medical history</b>                    |               |                  |                |         |                  |
| Diabetes - n (%)                          | 2 (12%)       | 9 (27%)          | 4 (36%)        | 0.342   | 0                |
| Permanent Pacemaker - n (%)               | 1 (6%)        | 1 (3%)           | 0 (0%)         | 1       | 0                |
| Stroke/Transient Ischaemic Attack - n (%) | 2 (12%)       | 3 (9%)           | 1 (9%)         | 1       | 0                |
| Chronic pulmonary disease - n (%)         | 3 (19%)       | 3 (9%)           | 2 (18%)        | 0.516   | 0                |
| Neurological disease - n (%)              | 0 (0%)        | 0 (0%)           | 0 (0%)         | --      | 0                |
| Renal disease - n (%)                     | 0 (0%)        | 1 (3%)           | 2 (18%)        | 0.139   | 0                |
| Myocardial infarction - n (%)             | 5 (31%)       | 8 (24%)          | 1 (9%)         | 0.464   | 0                |
| Extracardiac arteriopathy - n (%)         | 2 (12%)       | 4 (12%)          | 1 (9%)         | 1       | 0                |
| Liver disease - n (%)                     | 0 (0%)        | 0 (0%)           | 0 (0%)         | --      | 0                |
| Pulmonary hypertension - n (%)            | 0 (0%)        | 1 (3%)           | 0 (0%)         | 1       | 0                |
| <b>Pre-operative Medication History</b>   |               |                  |                |         |                  |
| Statin - n (%)                            | 12 (75%)      | 23 (70%)         | 10 (91%)       | 0.476   | 0                |
| Anti-platelet agents - n (%)              | 11 (69%)      | 28 (85%)         | 10 (91%)       | 0.354   | 0                |
| ACE inhibitors - n (%)                    | 9 (56%)       | 14 (42%)         | 5 (45%)        | 0.691   | 0                |
| <b>Clinical characteristics</b>           |               |                  |                |         |                  |
| Surgery type                              |               |                  |                |         |                  |
| CABG only - n (%)                         | 13 (81%)      | 29 (88%)         | 10 (91%)       | 0.772   | 0                |
| CABG & Valve - n (%)                      | 3 (19%)       | 4 (12%)          | 1 (9%)         |         |                  |
| NYHA                                      |               |                  |                |         |                  |
| Class I - n (%)                           | 4 (25%)       | 10 (30%)         | 4 (36%)        | 0.773   | 0                |
| Class II - n (%)                          | 11 (69%)      | 20 (61%)         | 5 (45%)        |         |                  |
| Class III, IV - n (%)                     | 1 (6%)        | 3 (9%)           | 2 (18%)        |         |                  |
| CCS                                       |               |                  |                |         |                  |
| Asymptomatic - n (%)                      | 5 (31%)       | 2 (6%)           | 2 (18%)        | 0.341   | 0                |
| Class I - n (%)                           | 6 (38%)       | 11 (33%)         | 4 (36%)        |         |                  |

|                                                                                      |                     |                     |                     |              |   |
|--------------------------------------------------------------------------------------|---------------------|---------------------|---------------------|--------------|---|
| Class II - n (%)                                                                     | 4 (25%)             | 16 (48%)            | 4 (36%)             |              |   |
| Class III, IV - n (%)                                                                | 1 (6%)              | 4 (12%)             | 1 (9%)              |              |   |
| Left Ventricular Ejection Fraction                                                   |                     |                     |                     |              |   |
| Good (>49%) - n (%)                                                                  | 13 (81%)            | 27 (82%)            | 8 (73%)             | 0.827        | 0 |
| Fair (30-49%) - n (%)                                                                | 3 (19%)             | 6 (18%)             | 3 (27%)             |              |   |
| Left main stem disease - n (%)                                                       | 2 (12%)             | 9 (27%)             | 2 (18%)             | 0.535        | 0 |
| Extent of coronary disease                                                           |                     |                     |                     |              |   |
| Normal/ 1VD - n (%)                                                                  | 1 (6%)              | 1 (3%)              | 3 (27%)             | 0.04         | 0 |
| 2VD - n (%)                                                                          | 7 (44%)             | 6 (18%)             | 2 (18%)             | 0.04         | 0 |
| 3VD - n (%)                                                                          | 8 (50%)             | 26 (79%)            | 6 (55%)             | 0.04         | 0 |
| Pre-operative PaO <sub>2</sub> /FiO <sub>2</sub> ratio - Median (1st - 3rd quartile) | 533 (445.2 - 690.5) | 495 (409.5 - 533.3) | 457 (409.5 - 457.1) | 0.280        | 8 |
| Pre-operative Platelets count (x10 <sup>9</sup> /L) - Mean (STD)                     | 222.2 (55.7)        | 232.6 (64.9)        | 231.5 (63.3)        | 0.858        | 1 |
| Pre-operative Serum Creatinine (umol/L) - Median (1st - 3rd quartile)                | 78 (70.8 - 102.5)   | 77 (68 - 87)        | 84 (77 - 92)        | 0.491        | 0 |
| Pre-operative Bilirubin (umol/L) - Median (1st - 3rd quartile)                       | 10 (7.5 - 12.5)     | 11 (8.5 - 12.5)     | 8 (8 - 12)          | 0.801        | 5 |
| <b>Postoperative</b>                                                                 |                     |                     |                     |              |   |
| Hct (%) - Mean (STD)                                                                 | 31.9 (3.9)          | 34.6 (3.9)          | 35 (4.9)            | 0.076        | 0 |
| MABP (mm Hg) - Median (1st - 3rd quartile)                                           | 76 (68.8 - 85)      | 73 (64 - 76)        | 65 (61.5 - 72)      | 0.672        | 0 |
| Lactate (mmol/L) - Median (1st - 3rd quartile)                                       | 2 (1.1 - 2)         | 2 (1.4 - 2.2)       | 2 (1.3 - 2)         | 0.970        | 1 |
| Inotropic score at 24h - Median (1st - 3rd quartile)                                 | 0 (0 - 2)           | 1 (0 - 3)           | 0 (0 - 3)           | 0.198        | 7 |
| Vasoactive score at 24h - Median (1st - 3rd quartile)                                | 5 (2.5 - 9)         | 5 (2.5 - 7)         | 4 (2 - 7.5)         | 0.198        | 4 |
| MODS ICU - Median (1st - 3rd quartile)                                               | 1 (1 - 3)           | 2 (2 - 3)           | 3 (2 - 3)           | <b>0.044</b> | 2 |
| Worst postoperative MODS score - Median (1st - 3rd quartile)                         | 2 (1 - 5)           | 3 (2 - 4)           | 3 (3 - 4)           | <b>0.023</b> | 1 |
| PaO <sub>2</sub> /FiO <sub>2</sub> ratio at 48h - Median (1st - 3rd quartile)        | 410 (342.1 - 572.6) | 395 (307.1 - 409.5) | 410 (342.3 - 457.1) | 0.127        | 1 |
| Serum creatinine 48h (umol/L) - Median (1st - 3rd quartile)                          | 73 (67.5 - 90)      | 71 (60 - 82)        | 74 (72 - 76)        | 0.383        | 2 |
| RBC transfused postoperative - n (%)                                                 | 8 (50%)             | 12 (36%)            | 2 (18%)             | 0.274        | 0 |
| nonRBC transfusion at more than 48h - n (%)                                          | 2 (12%)             | 4 (12%)             | 1 (9%)              | 1            | 0 |
| nonRBC transfusion within 48h - n (%)                                                | 6 (38%)             | 6 (18%)             | 0 (0%)              | <b>0.046</b> | 1 |
| PaO <sub>2</sub> /FiO <sub>2</sub> ratio at 48hr ≤300 - n (%)                        | 3 (19%)             | 4 (12%)             | 2 (18%)             | 0.7          | 1 |
| AKI according to kdigo criteria - n (%)                                              | 1 (6%)              | 1 (3%)              | 0 (0%)              | 1            | 1 |

Table S4 – Details of the pathway analysis. Number of genes indicates number of transcripts in the analyzed dataset. Direction indicates gene set's up or downregulation.

| Pathway                                                                      | 25≥BMI≤32 vs BMI<25 |           |         |                  | BMI>32 vs BMI<25 |           |         |                  | BMI>32 vs 25≥BMI≤32 |           |         |                  |
|------------------------------------------------------------------------------|---------------------|-----------|---------|------------------|------------------|-----------|---------|------------------|---------------------|-----------|---------|------------------|
|                                                                              | Number of Genes     | Direction | p-value | Adjusted p-value | Number of Genes  | Direction | p-value | Adjusted p-value | Number of Genes     | Direction | p-value | Adjusted p-value |
| Metabolism of amino acids and derivatives                                    | 327                 | Down      | 0.001   | 0.034            | NA               | NA        | NA      | NA               | NA                  | NA        | NA      | NA               |
| Translation                                                                  | 292                 | Down      | 0.000   | 0.004            | NA               | NA        | NA      | NA               | NA                  | NA        | NA      | NA               |
| Signaling by ROBO receptors                                                  | 207                 | Down      | 0.000   | 0.004            | 207              | Down      | 5.8E-04 | 0.034            | NA                  | NA        | NA      | NA               |
| rRNA processing                                                              | 203                 | Down      | 0.000   | 0.000            | 203              | Down      | 7.2E-05 | 0.006            | NA                  | NA        | NA      | NA               |
| rRNA processing in the nucleus and cytosol                                   | 191                 | Down      | 0.000   | 0.000            | 191              | Down      | 3.1E-05 | 0.003            | NA                  | NA        | NA      | NA               |
| Major pathway of rRNA processing in the nucleolus and cytosol                | 181                 | Down      | 0.000   | 0.000            | 181              | Down      | 1.5E-05 | 0.002            | NA                  | NA        | NA      | NA               |
| Regulation of expression of SLITs and ROBOs                                  | 163                 | Down      | 0.000   | 0.000            | 163              | Down      | 7.7E-05 | 0.006            | NA                  | NA        | NA      | NA               |
| Influenza Infection                                                          | 154                 | Down      | 0.000   | 0.000            | 154              | Down      | 2.4E-06 | 0.000            | NA                  | NA        | NA      | NA               |
| Influenza Viral RNA Transcription and Replication                            | 135                 | Down      | 0.000   | 0.000            | 135              | Down      | 1.5E-07 | 0.000            | NA                  | NA        | NA      | NA               |
| Cap-dependent Translation Initiation                                         | 118                 | Down      | 0.000   | 0.000            | 118              | Down      | 9.4E-10 | 0.000            | NA                  | NA        | NA      | NA               |
| Eukaryotic Translation Initiation                                            | 118                 | Down      | 0.000   | 0.000            | 118              | Down      | 9.4E-10 | 0.000            | NA                  | NA        | NA      | NA               |
| Nonsense Mediated Decay (NMD) enhanced by the Exon Junction Complex (EJC)    | 114                 | Down      | 0.000   | 0.000            | 114              | Down      | 1.1E-09 | 0.000            | NA                  | NA        | NA      | NA               |
| Nonsense-Mediated Decay (NMD)                                                | 114                 | Down      | 0.000   | 0.000            | 114              | Down      | 1.1E-09 | 0.000            | NA                  | NA        | NA      | NA               |
| Selenoamino acid metabolism                                                  | 114                 | Down      | 0.000   | 0.000            | 114              | Down      | 1.2E-11 | 0.000            | NA                  | NA        | NA      | NA               |
| GTP hydrolysis and joining of the 60S ribosomal subunit                      | 111                 | Down      | 0.000   | 0.000            | 111              | Down      | 6.2E-11 | 0.000            | NA                  | NA        | NA      | NA               |
| SRP-dependent cotranslational protein targeting to membrane                  | 111                 | Down      | 0.000   | 0.000            | 111              | Down      | 2.2E-12 | 0.000            | NA                  | NA        | NA      | NA               |
| L13a-mediated translational silencing of Ceruloplasmin expression            | 110                 | Down      | 0.000   | 0.000            | 110              | Down      | 1.1E-11 | 0.000            | NA                  | NA        | NA      | NA               |
| Formation of a pool of free 40S subunits                                     | 100                 | Down      | 0.000   | 0.000            | 100              | Down      | 2.8E-13 | 0.000            | NA                  | NA        | NA      | NA               |
| Response of EIF2AK4 (GCN2) to amino acid deficiency                          | 100                 | Down      | 0.000   | 0.000            | 100              | Down      | 4.2E-13 | 0.000            | NA                  | NA        | NA      | NA               |
| Nonsense Mediated Decay (NMD) independent of the Exon Junction Complex (EJC) | 94                  | Down      | 0.000   | 0.000            | 94               | Down      | 3.1E-14 | 0.000            | NA                  | NA        | NA      | NA               |

|                                                                                                        |    |      |       |       |    |      |         |       |    |    |    |    |
|--------------------------------------------------------------------------------------------------------|----|------|-------|-------|----|------|---------|-------|----|----|----|----|
| Eukaryotic Translation Elongation                                                                      | 92 | Down | 0.000 | 0.000 | 92 | Down | 1.1E-14 | 0.000 | NA | NA | NA | NA |
| Eukaryotic Translation Termination                                                                     | 92 | Down | 0.000 | 0.000 | 92 | Down | 2.3E-13 | 0.000 | NA | NA | NA | NA |
| Selenocysteine synthesis                                                                               | 92 | Down | 0.000 | 0.000 | 92 | Down | 3.1E-14 | 0.000 | NA | NA | NA | NA |
| Peptide chain elongation                                                                               | 88 | Down | 0.000 | 0.000 | 88 | Down | 6.9E-15 | 0.000 | NA | NA | NA | NA |
| Viral mRNA Translation                                                                                 | 88 | Down | 0.000 | 0.000 | 88 | Down | 5.7E-15 | 0.000 | NA | NA | NA | NA |
| Activation of the mRNA upon binding of the cap-binding complex and eIFs, and subsequent binding to 43S | 59 | Down | 0.000 | 0.000 | 59 | Down | 1.3E-05 | 0.001 | NA | NA | NA | NA |
| Ribosomal scanning and start codon recognition                                                         | 58 | Down | 0.000 | 0.000 | 58 | Down | 5.3E-05 | 0.005 | NA | NA | NA | NA |
| Translation initiation complex formation                                                               | 58 | Down | 0.000 | 0.000 | 58 | Down | 1.1E-05 | 0.001 | NA | NA | NA | NA |
| Interferon alpha/beta signaling                                                                        | 56 | Up   | 0.000 | 0.008 | NA | NA   | NA      | NA    | NA | NA | NA | NA |
| Formation of the ternary complex, and subsequently, the 43S complex                                    | 51 | Down | 0.000 | 0.000 | 51 | Down | 1.3E-06 | 0.000 | NA | NA | NA | NA |
| Iron uptake and transport                                                                              | 50 | Down | 0.000 | 0.017 | NA | NA   | NA      | NA    | NA | NA | NA | NA |
| Striated Muscle Contraction                                                                            | 29 | Up   | 0.000 | 0.004 | 29 | Up   | 1.5E-04 | 0.012 | NA | NA | NA | NA |
| Synthesis, secretion, and deacylation of Ghrelin                                                       | 12 | Down | 0.000 | 0.011 | NA | NA   | NA      | NA    | NA | NA | NA | NA |
| mitochondrial fatty acid beta-oxidation of saturated fatty acids                                       | 10 | Up   | 0.000 | 0.026 | NA | NA   | NA      | NA    | NA | NA | NA | NA |
| Defective F8 binding to von Willebrand factor                                                          | 2  | Up   | 0.000 | 0.017 | NA | NA   | NA      | NA    | NA | NA | NA | NA |
| Defective F8 cleavage by thrombin                                                                      | 2  | Up   | 0.000 | 0.017 | NA | NA   | NA      | NA    | NA | NA | NA | NA |
| HSF1-dependent transactivation                                                                         | NA | NA   | NA    | NA    | 35 | Up   | 2.2E-04 | 0.014 | NA | NA | NA | NA |
| Keratan sulfate degradation                                                                            | NA | NA   | NA    | NA    | 12 | Down | 3.3E-04 | 0.021 | NA | NA | NA | NA |
| Erythrocytes take up oxygen and release carbon dioxide                                                 | NA | NA   | NA    | NA    | 8  | Up   | 6.8E-05 | 0.006 | NA | NA | NA | NA |
| TNFR1-mediated ceramide production                                                                     | NA | NA   | NA    | NA    | 6  | Down | 8.2E-04 | 0.046 | NA | NA | NA | NA |
| Alternative complement activation                                                                      | NA | NA   | NA    | NA    | 4  | Down | 4.6E-04 | 0.028 | NA | NA | NA | NA |
| Ribonuclease P activity (lncRNA, Gene Ontology)                                                        | NA | NA   | NA    | NA    | 2  | Down | 2.1E-04 | 0.014 | NA | NA | NA | NA |
| tRNA processing (lncRNA, Gene Ontology)                                                                | NA | NA   | NA    | NA    | 2  | Down | 2.1E-04 | 0.014 | NA | NA | NA | NA |
| ribonuclease P complex (lncRNA, Gene Ontology)                                                         | NA | NA   | NA    | NA    | 2  | Down | 2.1E-04 | 0.014 | NA | NA | NA | NA |

|                                                                                    |    |    |    |    |    |      |         |       |    |      |         |         |
|------------------------------------------------------------------------------------|----|----|----|----|----|------|---------|-------|----|------|---------|---------|
| RNA phosphodiester bond hydrolysis, endonucleolytic (lncRNA, Gene Ontology)        | NA | NA | NA | NA | 2  | Down | 2.1E-04 | 0.014 | NA | NA   | NA      | NA      |
| Defective ACTH causes Obesity and Pro-opiomelanocortinin deficiency (POMCD)        | NA | NA | NA | NA | 1  | Up   | 7.3E-04 | 0.042 | NA | NA   | NA      | NA      |
| Binding and Uptake of Ligands by Scavenger Receptors                               | NA | NA | NA | NA | NA | NA   | NA      | NA    | 83 | Up   | 2.3E-05 | 5.6E-03 |
| Nucleolus (lncRNA, Gene Ontology)                                                  | NA | NA | NA | NA | 83 | Down | 1.9E-09 | 0.000 | 83 | Down | 4.0E-06 | 1.6E-03 |
| FCGR3A-mediated IL10 synthesis                                                     | NA | NA | NA | NA | NA | NA   | NA      | NA    | 82 | Up   | 8.8E-05 | 1.5E-02 |
| RNA processing (lncRNA, Gene Ontology)                                             | NA | NA | NA | NA | 81 | Down | 1.1E-09 | 0.000 | 81 | Down | 2.8E-06 | 1.4E-03 |
| Antigen activates B Cell Receptor (BCR) leading to generation of second messengers | NA | NA | NA | NA | NA | NA   | NA      | NA    | 74 | Up   | 9.8E-06 | 3.1E-03 |
| FCERI mediated Ca+2 mobilization                                                   | NA | NA | NA | NA | NA | NA   | NA      | NA    | 74 | Up   | 1.6E-04 | 2.4E-02 |
| Role of phospholipids in phagocytosis                                              | NA | NA | NA | NA | NA | NA   | NA      | NA    | 70 | Up   | 1.3E-04 | 2.0E-02 |
| Role of LAT2/NTAL/LAB on calcium mobilization                                      | NA | NA | NA | NA | NA | NA   | NA      | NA    | 59 | Up   | 2.6E-05 | 5.8E-03 |
| FCGR activation                                                                    | NA | NA | NA | NA | 58 | Up   | 4.8E-04 | 0.029 | 58 | Up   | 3.6E-07 | 2.4E-04 |
| Creation of C4 and C2 activators                                                   | NA | NA | NA | NA | NA | NA   | NA      | NA    | 56 | Up   | 1.0E-05 | 3.1E-03 |
| Scavenging of heme from plasma                                                     | NA | NA | NA | NA | 55 | Up   | 2.0E-04 | 0.014 | 55 | Up   | 3.9E-07 | 2.4E-04 |
| Classical antibody-mediated complement activation                                  | NA | NA | NA | NA | NA | NA   | NA      | NA    | 51 | Up   | 1.4E-05 | 3.8E-03 |
| CD22 mediated BCR regulation                                                       | NA | NA | NA | NA | 50 | Up   | 9.8E-05 | 0.008 | 50 | Up   | 8.4E-08 | 1.7E-04 |
| Cholesterol biosynthesis                                                           | NA | NA | NA | NA | NA | NA   | NA      | NA    | 24 | Up   | 1.4E-07 | 1.7E-04 |
| Acetylcholine regulates insulin secretion                                          | NA | NA | NA | NA | NA | NA   | NA      | NA    | 10 | Down | 2.8E-04 | 4.0E-02 |
| Metallothioneins bind metals                                                       | NA | NA | NA | NA | NA | NA   | NA      | NA    | 6  | Up   | 5.7E-05 | 1.1E-02 |
| Peptide hormone biosynthesis                                                       | NA | NA | NA | NA | NA | NA   | NA      | NA    | 5  | Up   | 2.9E-05 | 5.9E-03 |



Table S5 – Details of genes that were highly variable between the BMI groups (p-value < 0.05) with weighted gene correlation networks membership.

| Ensembl ID      | Gene Symbol | Description                                                                                    | Biotype                | 25≥BMI≤32 vs BMI<25 | BMI>32 vs BMI<25 | BMI>32 vs 25≥BMI≤32 | AveE xpr | F     | P.Value | Network |
|-----------------|-------------|------------------------------------------------------------------------------------------------|------------------------|---------------------|------------------|---------------------|----------|-------|---------|---------|
| ENSG0000008516  | MMP25       | matrix metalloproteinase 25 [Source:HGNC Symbol;Acc:HGNC:14246]                                | protein_coding         | 0.660               | 1.483            | 0.823               | -0.840   | 3.588 | 0.034   | black   |
| ENSG00000044524 | EPHA3       | EPH receptor A3 [Source:HGNC Symbol;Acc:HGNC:3387]                                             | protein_coding         | 0.332               | 0.303            | -0.029              | 4.173    | 3.281 | 0.045   | black   |
| ENSG00000081059 | TCF7        | transcription factor 7 [Source:HGNC Symbol;Acc:HGNC:11639]                                     | protein_coding         | 0.692               | 0.382            | -0.310              | 0.683    | 4.538 | 0.015   | black   |
| ENSG00000103855 | CD276       | CD276 molecule [Source:HGNC Symbol;Acc:HGNC:19137]                                             | protein_coding         | -0.160              | -0.335           | -0.175              | 3.597    | 4.537 | 0.015   | black   |
| ENSG00000112195 | TREML2      | triggering receptor expressed on myeloid cells like 2 [Source:HGNC Symbol;Acc:HGNC:21092]      | protein_coding         | 0.561               | 1.663            | 1.102               | -2.836   | 6.854 | 0.002   | black   |
| ENSG00000115607 | IL18RAP     | interleukin 18 receptor accessory protein [Source:HGNC Symbol;Acc:HGNC:5989]                   | protein_coding         | 1.019               | 1.721            | 0.702               | -1.977   | 6.032 | 0.004   | black   |
| ENSG00000128383 | APOBEC3A    | apolipoprotein B mRNA editing enzyme catalytic subunit 3A [Source:HGNC Symbol;Acc:HGNC:17343]  | protein_coding         | 0.719               | 1.443            | 0.724               | -2.212   | 3.213 | 0.048   | black   |
| ENSG00000134909 | ARHGAP32    | Rho GTPase activating protein 32 [Source:HGNC Symbol;Acc:HGNC:17399]                           | protein_coding         | -0.330              | -0.274           | 0.055               | 2.964    | 3.300 | 0.044   | black   |
| ENSG00000151789 | ZNF385D     | zinc finger protein 385D [Source:HGNC Symbol;Acc:HGNC:26191]                                   | protein_coding         | -0.849              | -0.948           | -0.099              | 1.222    | 5.439 | 0.007   | black   |
| ENSG00000151948 | GLT1D1      | glycosyltransferase 1 domain containing 1 [Source:HGNC Symbol;Acc:HGNC:26483]                  | protein_coding         | 0.500               | 1.431            | 0.931               | -2.593   | 3.845 | 0.027   | black   |
| ENSG00000157551 | KCNJ15      | potassium inwardly rectifying channel subfamily J member 15 [Source:HGNC Symbol;Acc:HGNC:6261] | protein_coding         | 0.200               | 1.144            | 0.945               | -0.392   | 3.709 | 0.031   | black   |
| ENSG00000158517 | NCF1        | neutrophil cytosolic factor 1 [Source:HGNC Symbol;Acc:HGNC:7660]                               | protein_coding         | 0.444               | 0.984            | 0.540               | 0.283    | 3.298 | 0.045   | black   |
| ENSG00000162676 | GFI1        | growth factor independent 1 transcriptional repressor [Source:HGNC Symbol;Acc:HGNC:4237]       | protein_coding         | 1.015               | 0.148            | -0.866              | -1.992   | 3.888 | 0.026   | black   |
| ENSG00000186529 | CYP4F3      | cytochrome P450 family 4 subfamily F member 3 [Source:HGNC Symbol;Acc:HGNC:2646]               | protein_coding         | 0.466               | 1.604            | 1.137               | -1.468   | 3.947 | 0.025   | black   |
| ENSG00000231259 | ANAPC1P2    | ANAPC1 pseudogene 2 [Source:HGNC Symbol;Acc:HGNC:54708]                                        | unprocessed_pseudogene | 0.406               | 2.080            | 1.674               | -3.395   | 3.707 | 0.031   | black   |
| ENSG00000280132 | AC026471.6  | novel transcript                                                                               | TEC                    | -0.819              | -0.471           | 0.347               | -2.296   | 3.240 | 0.047   | black   |
| ENSG00000005187 | ACSM3       | acyl-CoA synthetase medium chain family member 3 [Source:HGNC Symbol;Acc:HGNC:10522]           | protein_coding         | 0.390               | 0.550            | 0.159               | 2.505    | 3.933 | 0.025   | blue    |
| ENSG00000007908 | SELE        | selectin E [Source:HGNC Symbol;Acc:HGNC:10718]                                                 | protein_coding         | -0.227              | 1.951            | 2.178               | 0.162    | 4.623 | 0.014   | blue    |
| ENSG00000008300 | CELSR3      | cadherin EGF LAG seven-pass G-type receptor 3 [Source:HGNC Symbol;Acc:HGNC:3230]               | protein_coding         | 0.549               | 1.329            | 0.781               | -1.310   | 3.517 | 0.037   | blue    |
| ENSG00000011304 | PTBP1       | polypyrimidine tract binding protein 1 [Source:HGNC Symbol;Acc:HGNC:9583]                      | protein_coding         | 0.003               | 0.332            | 0.330               | 4.042    | 3.188 | 0.049   | blue    |

|                 |          |                                                                                      |                |        |        |        |        |       |       |      |
|-----------------|----------|--------------------------------------------------------------------------------------|----------------|--------|--------|--------|--------|-------|-------|------|
| ENSG0000050327  | ARHGEF5  | Rho guanine nucleotide exchange factor 5 [Source:HGNC Symbol;Acc:HGNC:13209]         | protein_coding | 0.132  | -0.309 | -0.441 | 1.745  | 3.362 | 0.042 | blue |
| ENSG0000054282  | SDCCAG8  | serologically defined colon cancer antigen 8 [Source:HGNC Symbol;Acc:HGNC:10671]     | protein_coding | -0.209 | -0.057 | 0.151  | 3.703  | 3.171 | 0.050 | blue |
| ENSG00000069399 | BCL3     | BCL3 transcription coactivator [Source:HGNC Symbol;Acc:HGNC:998]                     | protein_coding | -0.387 | 0.194  | 0.581  | 1.358  | 3.928 | 0.026 | blue |
| ENSG00000072182 | ASIC4    | acid sensing ion channel subunit family member 4 [Source:HGNC Symbol;Acc:HGNC:21263] | protein_coding | 1.217  | 0.334  | -0.883 | -2.353 | 3.435 | 0.039 | blue |
| ENSG00000081148 | IMPG2    | interphotoreceptor matrix proteoglycan 2 [Source:HGNC Symbol;Acc:HGNC:18362]         | protein_coding | -0.299 | 0.132  | 0.431  | -0.159 | 3.237 | 0.047 | blue |
| ENSG00000087074 | PPP1R15A | protein phosphatase 1 regulatory subunit 15A [Source:HGNC Symbol;Acc:HGNC:14375]     | protein_coding | -0.183 | 0.259  | 0.442  | 5.265  | 4.776 | 0.012 | blue |
| ENSG00000099860 | GADD45B  | growth arrest and DNA damage inducible beta [Source:HGNC Symbol;Acc:HGNC:4096]       | protein_coding | -0.279 | 0.422  | 0.701  | 4.460  | 3.543 | 0.036 | blue |
| ENSG00000100450 | GZMH     | granzyme H [Source:HGNC Symbol;Acc:HGNC:4710]                                        | protein_coding | 0.795  | 0.374  | -0.421 | -1.574 | 3.418 | 0.040 | blue |
| ENSG00000102390 | PBDC1    | polysaccharide biosynthesis domain containing 1 [Source:HGNC Symbol;Acc:HGNC:28790]  | protein_coding | -0.313 | -0.327 | -0.014 | 0.752  | 3.293 | 0.045 | blue |
| ENSG00000104368 | PLAT     | plasminogen activator, tissue type [Source:HGNC Symbol;Acc:HGNC:9051]                | protein_coding | -0.341 | 0.103  | 0.444  | 3.573  | 3.830 | 0.028 | blue |
| ENSG00000104490 | NCALD    | neurocalcin delta [Source:HGNC Symbol;Acc:HGNC:7655]                                 | protein_coding | -0.247 | 0.101  | 0.349  | 3.042  | 3.462 | 0.039 | blue |
| ENSG00000105835 | NAMPT    | nicotinamide phosphoribosyltransferase [Source:HGNC Symbol;Acc:HGNC:30092]           | protein_coding | -0.232 | 0.135  | 0.366  | 6.281  | 3.584 | 0.035 | blue |
| ENSG00000108342 | CSF3     | colony stimulating factor 3 [Source:HGNC Symbol;Acc:HGNC:2438]                       | protein_coding | 0.090  | 1.546  | 1.457  | -3.534 | 3.477 | 0.038 | blue |
| ENSG00000108691 | CCL2     | C-C motif chemokine ligand 2 [Source:HGNC Symbol;Acc:HGNC:10618]                     | protein_coding | -0.557 | 0.424  | 0.981  | 4.125  | 3.413 | 0.040 | blue |
| ENSG00000109610 | SOD3     | superoxide dismutase 3 [Source:HGNC Symbol;Acc:HGNC:11181]                           | protein_coding | 0.242  | 0.033  | -0.210 | 3.881  | 4.076 | 0.022 | blue |
| ENSG00000111424 | VDR      | vitamin D receptor [Source:HGNC Symbol;Acc:HGNC:12679]                               | protein_coding | -0.886 | -0.412 | 0.474  | -1.088 | 3.682 | 0.032 | blue |
| ENSG00000111912 | NCOA7    | nuclear receptor coactivator 7 [Source:HGNC Symbol;Acc:HGNC:21081]                   | protein_coding | -0.350 | 0.208  | 0.558  | 3.768  | 4.516 | 0.015 | blue |
| ENSG00000113356 | POLR3G   | RNA polymerase III subunit G [Source:HGNC Symbol;Acc:HGNC:30075]                     | protein_coding | -0.699 | 0.107  | 0.806  | -0.682 | 4.681 | 0.013 | blue |
| ENSG00000115665 | SLC5A7   | solute carrier family 5 member 7 [Source:HGNC Symbol;Acc:HGNC:14025]                 | protein_coding | 0.759  | 0.382  | -0.377 | -0.730 | 3.882 | 0.027 | blue |
| ENSG00000117036 | ETV3     | ETS variant transcription factor 3 [Source:HGNC Symbol;Acc:HGNC:3492]                | protein_coding | -0.171 | 0.017  | 0.188  | 3.442  | 3.613 | 0.034 | blue |
| ENSG00000117479 | SLC19A2  | solute carrier family 19 member 2 [Source:HGNC Symbol;Acc:HGNC:10938]                | protein_coding | -0.328 | 0.112  | 0.441  | 3.129  | 3.694 | 0.031 | blue |
| ENSG00000119231 | SENP5    | SUMO specific peptidase 5 [Source:HGNC Symbol;Acc:HGNC:28407]                        | protein_coding | -0.236 | -0.054 | 0.182  | 4.128  | 4.827 | 0.012 | blue |

|                 |          |                                                                                                      |                |        |        |        |        |       |       |      |
|-----------------|----------|------------------------------------------------------------------------------------------------------|----------------|--------|--------|--------|--------|-------|-------|------|
| ENSG00000121101 | TEX14    | testis expressed 14, intercellular bridge forming factor [Source:HGNC Symbol;Acc:HGNC:11737]         | protein_coding | -0.623 | 0.621  | 1.244  | -2.762 | 3.489 | 0.038 | blue |
| ENSG00000124831 | LRRFIP1  | LRR binding FLII interacting protein 1 [Source:HGNC Symbol;Acc:HGNC:6702]                            | protein_coding | 0.121  | 0.282  | 0.161  | 5.483  | 5.830 | 0.005 | blue |
| ENSG00000125148 | MT2A     | metallothionein 2A [Source:HGNC Symbol;Acc:HGNC:7406]                                                | protein_coding | -0.267 | 0.262  | 0.529  | 3.039  | 3.349 | 0.043 | blue |
| ENSG00000131873 | CHSY1    | chondroitin sulfate synthase 1 [Source:HGNC Symbol;Acc:HGNC:17198]                                   | protein_coding | -0.113 | 0.222  | 0.335  | 4.054  | 3.919 | 0.026 | blue |
| ENSG00000132002 | DNAJB1   | DnaJ heat shock protein family (Hsp40) member B1 [Source:HGNC Symbol;Acc:HGNC:5270]                  | protein_coding | -0.152 | 0.106  | 0.258  | 4.141  | 3.444 | 0.039 | blue |
| ENSG00000132680 | KHDC4    | KH domain containing 4, pre-mRNA splicing factor [Source:HGNC Symbol;Acc:HGNC:29145]                 | protein_coding | 0.187  | 0.072  | -0.115 | 3.430  | 3.224 | 0.048 | blue |
| ENSG00000133874 | RNF122   | ring finger protein 122 [Source:HGNC Symbol;Acc:HGNC:21147]                                          | protein_coding | -0.335 | 0.163  | 0.498  | 1.842  | 4.665 | 0.014 | blue |
| ENSG00000136011 | STAB2    | stabilin 2 [Source:HGNC Symbol;Acc:HGNC:18629]                                                       | protein_coding | 0.746  | 1.809  | 1.063  | 0.113  | 5.282 | 0.008 | blue |
| ENSG00000138166 | DUSP5    | dual specificity phosphatase 5 [Source:HGNC Symbol;Acc:HGNC:3071]                                    | protein_coding | -0.192 | 0.635  | 0.827  | 1.719  | 4.758 | 0.013 | blue |
| ENSG00000140379 | BCL2A1   | BCL2 related protein A1 [Source:HGNC Symbol;Acc:HGNC:991]                                            | protein_coding | -0.450 | 0.792  | 1.243  | -1.444 | 4.978 | 0.010 | blue |
| ENSG00000140406 | TLNRD1   | talin rod domain containing 1 [Source:HGNC Symbol;Acc:HGNC:13519]                                    | protein_coding | -0.320 | -0.037 | 0.283  | 2.440  | 3.270 | 0.046 | blue |
| ENSG00000141698 | NT5C3B   | 5'-nucleotidase, cytosolic IIB [Source:HGNC Symbol;Acc:HGNC:28300]                                   | protein_coding | -0.205 | -0.260 | -0.054 | 2.528  | 3.594 | 0.034 | blue |
| ENSG00000143320 | CRABP2   | cellular retinoic acid binding protein 2 [Source:HGNC Symbol;Acc:HGNC:2339]                          | protein_coding | -0.678 | 0.122  | 0.801  | -1.537 | 3.293 | 0.045 | blue |
| ENSG00000157557 | ETS2     | ETS proto-oncogene 2, transcription factor [Source:HGNC Symbol;Acc:HGNC:3489]                        | protein_coding | -0.146 | 0.181  | 0.327  | 4.453  | 4.183 | 0.020 | blue |
| ENSG00000159167 | STC1     | stanniocalcin 1 [Source:HGNC Symbol;Acc:HGNC:11373]                                                  | protein_coding | 0.045  | 0.783  | 0.737  | 1.819  | 5.021 | 0.010 | blue |
| ENSG00000159339 | PADI4    | peptidyl arginine deiminase 4 [Source:HGNC Symbol;Acc:HGNC:18368]                                    | protein_coding | 0.310  | 1.329  | 1.019  | -2.660 | 3.572 | 0.035 | blue |
| ENSG00000160785 | SLC25A44 | solute carrier family 25 member 44 [Source:HGNC Symbol;Acc:HGNC:29036]                               | protein_coding | -0.184 | 0.056  | 0.240  | 3.205  | 4.932 | 0.011 | blue |
| ENSG00000163159 | VPS72    | vacuolar protein sorting 72 homolog [Source:HGNC Symbol;Acc:HGNC:11644]                              | protein_coding | 0.102  | -0.107 | -0.209 | 2.964  | 3.568 | 0.035 | blue |
| ENSG00000163638 | ADAMTS9  | ADAM metalloproteinase with thrombospondin type 1 motif 9 [Source:HGNC Symbol;Acc:HGNC:13202]        | protein_coding | 0.077  | 0.746  | 0.669  | 2.790  | 6.067 | 0.004 | blue |
| ENSG00000163659 | TIPARP   | TCDD inducible poly(ADP-ribose) polymerase [Source:HGNC Symbol;Acc:HGNC:23696]                       | protein_coding | -0.233 | 0.131  | 0.364  | 4.737  | 5.080 | 0.010 | blue |
| ENSG00000163909 | HEYL     | hes related family bHLH transcription factor with YRPW motif like [Source:HGNC Symbol;Acc:HGNC:4882] | protein_coding | 0.090  | 0.279  | 0.188  | 4.254  | 3.662 | 0.032 | blue |
| ENSG00000164120 | HPGD     | 15-hydroxyprostaglandin dehydrogenase [Source:HGNC Symbol;Acc:HGNC:5154]                             | protein_coding | -0.789 | -0.153 | 0.636  | -0.951 | 6.485 | 0.003 | blue |

|                 |             |                                                                                         |                |        |        |        |        |       |       |      |
|-----------------|-------------|-----------------------------------------------------------------------------------------|----------------|--------|--------|--------|--------|-------|-------|------|
| ENSG00000164949 | GEM         | GTP binding protein overexpressed in skeletal muscle [Source:HGNC Symbol;Acc:HGNC:4234] | protein_coding | -0.325 | 0.352  | 0.678  | 3.652  | 3.528 | 0.036 | blue |
| ENSG00000165030 | NFIL3       | nuclear factor, interleukin 3 regulated [Source:HGNC Symbol;Acc:HGNC:7787]              | protein_coding | -0.308 | 0.196  | 0.504  | 3.114  | 4.548 | 0.015 | blue |
| ENSG00000171236 | LRG1        | leucine rich alpha-2-glycoprotein 1 [Source:HGNC Symbol;Acc:HGNC:29480]                 | protein_coding | -0.327 | 1.237  | 1.564  | -2.058 | 6.716 | 0.002 | blue |
| ENSG00000171617 | ENC1        | ectodermal-neural cortex 1 [Source:HGNC Symbol;Acc:HGNC:3345]                           | protein_coding | -0.311 | 0.080  | 0.391  | 2.751  | 3.936 | 0.025 | blue |
| ENSG00000172530 | BANP        | BTG3 associated nuclear protein [Source:HGNC Symbol;Acc:HGNC:13450]                     | protein_coding | -0.187 | 0.272  | 0.459  | 2.138  | 3.810 | 0.028 | blue |
| ENSG00000172602 | RND1        | Rho family GTPase 1 [Source:HGNC Symbol;Acc:HGNC:18314]                                 | protein_coding | -0.032 | 1.742  | 1.774  | -1.368 | 6.852 | 0.002 | blue |
| ENSG00000172831 | CES2        | carboxylesterase 2 [Source:HGNC Symbol;Acc:HGNC:1864]                                   | protein_coding | 0.136  | -0.023 | -0.159 | 4.210  | 3.635 | 0.033 | blue |
| ENSG00000173530 | TNFRSF10D   | TNF receptor superfamily member 10d [Source:HGNC Symbol;Acc:HGNC:11907]                 | protein_coding | -0.141 | 0.364  | 0.505  | 1.411  | 3.238 | 0.047 | blue |
| ENSG00000178726 | THBD        | thrombomodulin [Source:HGNC Symbol;Acc:HGNC:11784]                                      | protein_coding | -0.259 | 0.304  | 0.563  | 3.371  | 4.473 | 0.016 | blue |
| ENSG00000179082 | C9orf106    | chromosome 9 putative open reading frame 106 [Source:HGNC Symbol;Acc:HGNC:31370]        | lncRNA         | 0.727  | -0.628 | -1.355 | -1.877 | 7.572 | 0.001 | blue |
| ENSG00000180596 | H2BC4       | H2B clustered histone 4 [Source:HGNC Symbol;Acc:HGNC:4757]                              | protein_coding | 0.177  | -0.028 | -0.205 | 3.297  | 3.405 | 0.041 | blue |
| ENSG00000184588 | PDE4B       | phosphodiesterase 4B [Source:HGNC Symbol;Acc:HGNC:8781]                                 | protein_coding | -0.363 | 0.044  | 0.407  | 4.575  | 7.698 | 0.001 | blue |
| ENSG00000185022 | MAFF        | MAF bZIP transcription factor F [Source:HGNC Symbol;Acc:HGNC:6780]                      | protein_coding | -0.378 | 0.535  | 0.913  | 2.439  | 3.421 | 0.040 | blue |
| ENSG00000186056 | MATN1-AS1   | MATN1 antisense RNA 1 [Source:HGNC Symbol;Acc:HGNC:40364]                               | lncRNA         | 0.519  | -0.749 | -1.269 | -1.509 | 4.168 | 0.021 | blue |
| ENSG00000186407 | CD300E      | CD300e molecule [Source:HGNC Symbol;Acc:HGNC:28874]                                     | protein_coding | 0.095  | 1.070  | 0.975  | -0.810 | 5.256 | 0.008 | blue |
| ENSG00000187140 | FOXD3       | forkhead box D3 [Source:HGNC Symbol;Acc:HGNC:3804]                                      | protein_coding | 0.345  | -0.251 | -0.597 | -0.484 | 3.331 | 0.043 | blue |
| ENSG00000187624 | C17orf97    | chromosome 17 open reading frame 97 [Source:HGNC Symbol;Acc:HGNC:33800]                 | protein_coding | 0.659  | -0.078 | -0.737 | 0.250  | 3.295 | 0.045 | blue |
| ENSG00000196189 | SEMA4A      | semaphorin 4A [Source:HGNC Symbol;Acc:HGNC:10729]                                       | protein_coding | -0.780 | 0.596  | 1.377  | 1.266  | 4.446 | 0.016 | blue |
| ENSG00000196843 | ARID5A      | AT-rich interaction domain 5A [Source:HGNC Symbol;Acc:HGNC:17361]                       | protein_coding | -0.103 | 0.435  | 0.537  | 2.619  | 4.311 | 0.018 | blue |
| ENSG00000197063 | MAFG        | MAF bZIP transcription factor G [Source:HGNC Symbol;Acc:HGNC:6781]                      | protein_coding | 0.006  | 0.262  | 0.256  | 3.370  | 3.276 | 0.045 | blue |
| ENSG00000203392 | AC10502.0.1 | novel transcript, antisense to CSPG4                                                    | lncRNA         | -0.667 | -0.224 | 0.443  | -2.638 | 3.552 | 0.036 | blue |
| ENSG00000205362 | MT1A        | metallothionein 1A [Source:HGNC Symbol;Acc:HGNC:7393]                                   | protein_coding | -0.536 | 1.389  | 1.925  | -1.896 | 7.349 | 0.002 | blue |

|                 |             |                                                                                               |                        |        |        |        |        |       |       |      |
|-----------------|-------------|-----------------------------------------------------------------------------------------------|------------------------|--------|--------|--------|--------|-------|-------|------|
| ENSG00000205502 | C2CD4B      | C2 calcium dependent domain containing 4B [Source:HGNC Symbol;Acc:HGNC:33628]                 | protein_coding         | -0.145 | 1.343  | 1.488  | -1.386 | 4.024 | 0.024 | blue |
| ENSG00000205710 | C17orf107   | chromosome 17 open reading frame 107 [Source:HGNC Symbol;Acc:HGNC:37238]                      | protein_coding         | -0.507 | 0.031  | 0.539  | 0.243  | 3.571 | 0.035 | blue |
| ENSG00000213753 | CENPBD1P1   | CENPB DNA-binding domains containing 1 pseudogene 1 [Source:HGNC Symbol;Acc:HGNC:28421]       | transcribed_pseudogene | -0.063 | 0.476  | 0.539  | 3.360  | 4.367 | 0.017 | blue |
| ENSG00000215022 | AL008729.1  | novel transcript, antisense to PHACTR1                                                        | lncRNA                 | -1.104 | -0.510 | 0.594  | -2.011 | 4.738 | 0.013 | blue |
| ENSG00000218336 | TENM3       | teneurin transmembrane protein 3 [Source:HGNC Symbol;Acc:HGNC:29944]                          | protein_coding         | 0.206  | -0.310 | -0.516 | 3.341  | 4.249 | 0.019 | blue |
| ENSG00000229828 | PDE4DIP1    | phosphodiesterase 4D interacting protein pseudogene 1 [Source:HGNC Symbol;Acc:HGNC:50867]     | unprocessed_pseudogene | 1.137  | -1.068 | -2.205 | -3.373 | 3.685 | 0.032 | blue |
| ENSG00000229927 | RHEBP1      | RHEB pseudogene 1 [Source:HGNC Symbol;Acc:HGNC:10010]                                         | processed_pseudogene   | 1.055  | -0.912 | -1.967 | -2.919 | 3.470 | 0.038 | blue |
| ENSG00000230658 | KLHL7-DT    | KLHL7 divergent transcript [Source:HGNC Symbol;Acc:HGNC:43431]                                | lncRNA                 | -1.168 | -0.020 | 1.148  | -1.819 | 6.573 | 0.003 | blue |
| ENSG00000237513 | AC007384.1  | novel transcript                                                                              | lncRNA                 | -0.207 | 0.783  | 0.990  | -1.425 | 3.677 | 0.032 | blue |
| ENSG00000237928 | NFIA-AS2    | NFIA antisense RNA 2 [Source:HGNC Symbol;Acc:HGNC:40401]                                      | lncRNA                 | -0.712 | -0.599 | 0.114  | -0.666 | 3.829 | 0.028 | blue |
| ENSG00000239713 | APOBEC3G    | apolipoprotein B mRNA editing enzyme catalytic subunit 3G [Source:HGNC Symbol;Acc:HGNC:17357] | protein_coding         | 0.310  | 0.117  | -0.192 | 1.534  | 4.143 | 0.021 | blue |
| ENSG00000249839 | AC011330.1  | histidine acid phosphatase domain containing 2A (HISPPD2A) pseudogene                         | unprocessed_pseudogene | 2.365  | 0.372  | -1.993 | -2.799 | 5.169 | 0.009 | blue |
| ENSG00000250312 | ZNF718      | zinc finger protein 718 [Source:HGNC Symbol;Acc:HGNC:26889]                                   | protein_coding         | 0.171  | -0.399 | -0.571 | 1.365  | 3.867 | 0.027 | blue |
| ENSG00000250506 | CDK3        | cyclin dependent kinase 3 [Source:HGNC Symbol;Acc:HGNC:1772]                                  | protein_coding         | -0.909 | 0.250  | 1.160  | -1.755 | 3.429 | 0.040 | blue |
| ENSG00000251441 | RTEL1P1     | regulator of telomere elongation helicase 1 pseudogene 1 [Source:HGNC Symbol;Acc:HGNC:44213]  | transcribed_pseudogene | 0.660  | -0.368 | -1.028 | -2.497 | 3.763 | 0.030 | blue |
| ENSG00000255717 | SNHG1       | small nucleolar RNA host gene 1 [Source:HGNC Symbol;Acc:HGNC:32688]                           | lncRNA                 | 0.076  | -0.339 | -0.415 | 1.948  | 4.936 | 0.011 | blue |
| ENSG00000255819 | KLRC4-KLRK1 | KLRC4-KLRK1 readthrough [Source:HGNC Symbol;Acc:HGNC:48357]                                   | protein_coding         | 1.177  | -0.077 | -1.253 | -2.951 | 3.482 | 0.038 | blue |
| ENSG00000256463 | SALL3       | spalt like transcription factor 3 [Source:HGNC Symbol;Acc:HGNC:10527]                         | protein_coding         | 0.102  | 0.880  | 0.778  | -0.631 | 3.320 | 0.044 | blue |
| ENSG00000272446 | AL158850.1  | novel transcript                                                                              | lncRNA                 | 0.476  | -0.085 | -0.561 | -0.609 | 4.162 | 0.021 | blue |
| ENSG00000272617 | AC026464.6  | novel protein, COG8-PDF readthrough                                                           | protein_coding         | 1.371  | -0.809 | -2.180 | -3.284 | 6.696 | 0.003 | blue |
| ENSG00000277283 | AC004812.2  | novel transcript, antisense to RAB35                                                          | lncRNA                 | 0.078  | -0.631 | -0.709 | -0.690 | 4.947 | 0.011 | blue |
| ENSG00000277363 | SRCIN1      | SRC kinase signaling inhibitor 1 [Source:HGNC Symbol;Acc:HGNC:29506]                          | protein_coding         | -0.279 | 0.435  | 0.714  | 0.321  | 3.882 | 0.027 | blue |

|                 |            |                                                                                               |                |        |        |        |        |       |       |       |
|-----------------|------------|-----------------------------------------------------------------------------------------------|----------------|--------|--------|--------|--------|-------|-------|-------|
| ENSG00000278989 | AP001148.1 | novel transcript                                                                              | TEC            | 0.314  | -0.506 | -0.820 | -1.567 | 3.457 | 0.039 | blue  |
| ENSG00000280077 | AL353763.2 | TEC                                                                                           | TEC            | -0.094 | -0.527 | -0.433 | -0.016 | 3.364 | 0.042 | blue  |
| ENSG00000280594 | BTG3-AS1   | BTG3 antisense RNA 1 [Source:HGNC Symbol;Acc:HGNC:53145]                                      | lncRNA         | -0.354 | 0.847  | 1.201  | -2.447 | 6.519 | 0.003 | blue  |
| ENSG00000285679 | AC079142.1 | novel transcript                                                                              | lncRNA         | -0.088 | -0.559 | -0.470 | -1.239 | 3.201 | 0.049 | blue  |
| ENSG00000286235 | AL035461.4 | novel protein                                                                                 | protein_coding | 1.801  | -0.874 | -2.676 | -3.893 | 4.982 | 0.010 | blue  |
| ENSG00000288253 | AC010332.3 | novel transcript                                                                              | lncRNA         | 0.691  | -0.918 | -1.610 | -2.907 | 3.933 | 0.025 | blue  |
| ENSG00000288534 | AP001931.2 | TMX2-CTNND1 readthrough (NMD candidate)                                                       | protein_coding | -1.012 | -0.084 | 0.929  | 3.431  | 3.623 | 0.033 | blue  |
| ENSG00000019549 | SNAI2      | snail family transcriptional repressor 2 [Source:HGNC Symbol;Acc:HGNC:11094]                  | protein_coding | -0.149 | -0.417 | -0.268 | 2.793  | 3.550 | 0.036 | brown |
| ENSG00000036257 | CUL3       | cullin 3 [Source:HGNC Symbol;Acc:HGNC:2553]                                                   | protein_coding | 0.237  | 0.158  | -0.079 | 4.597  | 5.665 | 0.006 | brown |
| ENSG00000049449 | RCN1       | reticulocalbin 1 [Source:HGNC Symbol;Acc:HGNC:9934]                                           | protein_coding | -0.268 | -0.486 | -0.218 | 3.853  | 5.442 | 0.007 | brown |
| ENSG00000070526 | ST6GALNAC1 | ST6 N-acetylgalactosaminide alpha-2,6-sialyltransferase 1 [Source:HGNC Symbol;Acc:HGNC:23614] | protein_coding | 0.355  | 0.755  | 0.399  | 0.172  | 4.040 | 0.023 | brown |
| ENSG00000100664 | EIF5       | eukaryotic translation initiation factor 5 [Source:HGNC Symbol;Acc:HGNC:3299]                 | protein_coding | 0.202  | 0.157  | -0.045 | 6.467  | 6.477 | 0.003 | brown |
| ENSG00000101191 | DIDO1      | death inducer-obliterator 1 [Source:HGNC Symbol;Acc:HGNC:2680]                                | protein_coding | 0.095  | 0.136  | 0.042  | 4.853  | 4.001 | 0.024 | brown |
| ENSG00000101413 | RPRD1B     | regulation of nuclear pre-mRNA domain containing 1B [Source:HGNC Symbol;Acc:HGNC:16209]       | protein_coding | 0.210  | 0.374  | 0.164  | 4.496  | 4.164 | 0.021 | brown |
| ENSG00000101938 | CHRD1      | chordin like 1 [Source:HGNC Symbol;Acc:HGNC:29861]                                            | protein_coding | -0.271 | -0.525 | -0.255 | 4.534  | 3.324 | 0.044 | brown |
| ENSG00000104313 | EYA1       | EYA transcriptional coactivator and phosphatase 1 [Source:HGNC Symbol;Acc:HGNC:3519]          | protein_coding | 0.467  | 0.743  | 0.276  | 2.425  | 5.518 | 0.007 | brown |
| ENSG00000105499 | PLA2G4C    | phospholipase A2 group IVC [Source:HGNC Symbol;Acc:HGNC:9037]                                 | protein_coding | 0.413  | 0.493  | 0.080  | 3.074  | 4.491 | 0.016 | brown |
| ENSG00000108239 | TBC1D12    | TBC1 domain family member 12 [Source:HGNC Symbol;Acc:HGNC:29082]                              | protein_coding | -0.220 | -0.204 | 0.017  | 3.026  | 3.612 | 0.034 | brown |
| ENSG00000110881 | ASIC1      | acid sensing ion channel subunit 1 [Source:HGNC Symbol;Acc:HGNC:100]                          | protein_coding | 0.008  | -0.582 | -0.589 | -0.140 | 3.196 | 0.049 | brown |
| ENSG00000111224 | PARP11     | poly(ADP-ribose) polymerase family member 11 [Source:HGNC Symbol;Acc:HGNC:1186]               | protein_coding | -0.503 | -0.422 | 0.080  | 1.232  | 3.292 | 0.045 | brown |
| ENSG00000116774 | OLFML3     | olfactomedin like 3 [Source:HGNC Symbol;Acc:HGNC:24956]                                       | protein_coding | -0.343 | -0.463 | -0.121 | 4.225  | 3.705 | 0.031 | brown |
| ENSG00000117020 | AKT3       | AKT serine/threonine kinase 3 [Source:HGNC Symbol;Acc:HGNC:393]                               | protein_coding | -0.222 | -0.167 | 0.055  | 5.009  | 4.142 | 0.021 | brown |

|                 |         |                                                                                                |                |        |        |        |        |       |       |       |
|-----------------|---------|------------------------------------------------------------------------------------------------|----------------|--------|--------|--------|--------|-------|-------|-------|
| ENSG00000117868 | ESYT2   | extended synaptotagmin 2 [Source:HGNC Symbol;Acc:HGNC:22211]                                   | protein_coding | -0.178 | -0.130 | 0.048  | 5.883  | 4.313 | 0.018 | brown |
| ENSG00000118194 | TNNT2   | troponin T2, cardiac type [Source:HGNC Symbol;Acc:HGNC:11949]                                  | protein_coding | 0.126  | 0.378  | 0.253  | 10.245 | 4.575 | 0.015 | brown |
| ENSG00000119682 | AREL1   | apoptosis resistant E3 ubiquitin protein ligase 1 [Source:HGNC Symbol;Acc:HGNC:20363]          | protein_coding | 0.267  | 0.462  | 0.195  | 3.489  | 4.362 | 0.018 | brown |
| ENSG00000120820 | GLT8D2  | glycosyltransferase 8 domain containing 2 [Source:HGNC Symbol;Acc:HGNC:24890]                  | protein_coding | -0.397 | -0.417 | -0.020 | 2.425  | 4.313 | 0.018 | brown |
| ENSG00000120910 | PPP3CC  | protein phosphatase 3 catalytic subunit gamma [Source:HGNC Symbol;Acc:HGNC:9316]               | protein_coding | -0.086 | 0.223  | 0.309  | 3.423  | 3.409 | 0.040 | brown |
| ENSG00000122707 | RECK    | reversion inducing cysteine rich protein with kazal motifs [Source:HGNC Symbol;Acc:HGNC:11345] | protein_coding | -0.258 | -0.252 | 0.006  | 3.082  | 3.271 | 0.046 | brown |
| ENSG00000122870 | BICC1   | Bic family RNA binding protein 1 [Source:HGNC Symbol;Acc:HGNC:19351]                           | protein_coding | -0.286 | -0.414 | -0.128 | 4.523  | 4.033 | 0.023 | brown |
| ENSG00000129226 | CD68    | CD68 molecule [Source:HGNC Symbol;Acc:HGNC:1693]                                               | protein_coding | -0.299 | -0.586 | -0.287 | 4.540  | 4.210 | 0.020 | brown |
| ENSG00000132780 | NASP    | nuclear autoantigenic sperm protein [Source:HGNC Symbol;Acc:HGNC:7644]                         | protein_coding | 0.167  | 0.251  | 0.083  | 3.843  | 3.803 | 0.029 | brown |
| ENSG00000134917 | ADAMTS8 | ADAM metalloproteinase with thrombospondin type 1 motif 8 [Source:HGNC Symbol;Acc:HGNC:224]    | protein_coding | -0.660 | -0.890 | -0.230 | -0.940 | 5.345 | 0.008 | brown |
| ENSG00000136999 | CCN3    | cellular communication network factor 3 [Source:HGNC Symbol;Acc:HGNC:7885]                     | protein_coding | -0.421 | -0.178 | 0.243  | 2.767  | 3.434 | 0.039 | brown |
| ENSG00000140092 | FBLN5   | fibulin 5 [Source:HGNC Symbol;Acc:HGNC:3602]                                                   | protein_coding | -0.261 | -0.393 | -0.132 | 5.737  | 3.873 | 0.027 | brown |
| ENSG00000140254 | DUOXA1  | dual oxidase maturation factor 1 [Source:HGNC Symbol;Acc:HGNC:26507]                           | protein_coding | -0.532 | -1.044 | -0.512 | -1.056 | 3.827 | 0.028 | brown |
| ENSG00000141232 | TOB1    | transducer of ERBB2, 1 [Source:HGNC Symbol;Acc:HGNC:11979]                                     | protein_coding | -0.228 | -0.251 | -0.023 | 3.660  | 3.573 | 0.035 | brown |
| ENSG00000141252 | VPS53   | VPS53 subunit of GARP complex [Source:HGNC Symbol;Acc:HGNC:25608]                              | protein_coding | 0.012  | 0.353  | 0.341  | 3.760  | 4.482 | 0.016 | brown |
| ENSG00000143344 | RGL1    | ral guanine nucleotide dissociation stimulator like 1 [Source:HGNC Symbol;Acc:HGNC:30281]      | protein_coding | -0.096 | -0.256 | -0.160 | 4.624  | 3.322 | 0.044 | brown |
| ENSG00000145147 | SLIT2   | slit guidance ligand 2 [Source:HGNC Symbol;Acc:HGNC:11086]                                     | protein_coding | 0.072  | -0.267 | -0.339 | 3.931  | 5.314 | 0.008 | brown |
| ENSG00000147255 | IGSF1   | immunoglobulin superfamily member 1 [Source:HGNC Symbol;Acc:HGNC:5948]                         | protein_coding | 0.710  | 0.785  | 0.075  | 3.638  | 3.518 | 0.037 | brown |
| ENSG00000147394 | ZNF185  | zinc finger protein 185 with LIM domain [Source:HGNC Symbol;Acc:HGNC:12976]                    | protein_coding | -0.482 | -0.556 | -0.073 | 0.709  | 3.963 | 0.025 | brown |
| ENSG00000148082 | SHC3    | SHC adaptor protein 3 [Source:HGNC Symbol;Acc:HGNC:18181]                                      | protein_coding | -0.794 | -0.579 | 0.215  | 1.601  | 5.491 | 0.007 | brown |
| ENSG00000148344 | PTGES   | prostaglandin E synthase [Source:HGNC Symbol;Acc:HGNC:9599]                                    | protein_coding | -0.578 | -0.782 | -0.204 | 0.217  | 3.931 | 0.025 | brown |
| ENSG00000148700 | ADD3    | adducin 3 [Source:HGNC Symbol;Acc:HGNC:245]                                                    | protein_coding | -0.160 | -0.228 | -0.069 | 6.483  | 3.947 | 0.025 | brown |

|                 |         |                                                                                                       |                |        |        |        |       |         |       |       |
|-----------------|---------|-------------------------------------------------------------------------------------------------------|----------------|--------|--------|--------|-------|---------|-------|-------|
| ENSG00000149090 | PAMR1   | peptidase domain containing associated with muscle regeneration 1 [Source:HGNC Symbol;Acc:HGNC:24554] | protein_coding | -0.812 | -0.817 | -0.005 | 3.052 | 6.267   | 0.004 | brown |
| ENSG00000153707 | PTPRD   | protein tyrosine phosphatase receptor type D [Source:HGNC Symbol;Acc:HGNC:9668]                       | protein_coding | -0.710 | -0.574 | 0.136  | 2.598 | 3.432   | 0.040 | brown |
| ENSG00000154263 | ABCA10  | ATP binding cassette subfamily A member 10 [Source:HGNC Symbol;Acc:HGNC:30]                           | protein_coding | 0.080  | -0.466 | -0.545 | 2.739 | 3.272   | 0.046 | brown |
| ENSG00000156097 | GPR61   | G protein-coupled receptor 61 [Source:HGNC Symbol;Acc:HGNC:13300]                                     | protein_coding | 1.073  | 0.014  | -1.059 | -     | 2.46250 | 0.046 | brown |
| ENSG00000156466 | GDF6    | growth differentiation factor 6 [Source:HGNC Symbol;Acc:HGNC:4221]                                    | protein_coding | -0.449 | -0.703 | -0.254 | 1.077 | 4.000   | 0.024 | brown |
| ENSG00000162407 | PLPP3   | phospholipid phosphatase 3 [Source:HGNC Symbol;Acc:HGNC:9229]                                         | protein_coding | -0.227 | -0.257 | -0.029 | 5.571 | 3.784   | 0.029 | brown |
| ENSG00000162616 | DNAJB4  | DnaJ heat shock protein family (Hsp40) member B4 [Source:HGNC Symbol;Acc:HGNC:14886]                  | protein_coding | 0.045  | 0.224  | 0.179  | 5.020 | 3.171   | 0.050 | brown |
| ENSG00000162733 | DDR2    | discoidin domain receptor tyrosine kinase 2 [Source:HGNC Symbol;Acc:HGNC:2731]                        | protein_coding | -0.091 | -0.209 | -0.118 | 6.606 | 4.449   | 0.016 | brown |
| ENSG00000164591 | MYOZ3   | myozenin 3 [Source:HGNC Symbol;Acc:HGNC:18565]                                                        | protein_coding | 0.472  | 0.616  | 0.144  | 1.180 | 3.789   | 0.029 | brown |
| ENSG00000165072 | MAMDC2  | MAM domain containing 2 [Source:HGNC Symbol;Acc:HGNC:23673]                                           | protein_coding | -0.310 | -0.152 | 0.158  | 3.638 | 3.734   | 0.030 | brown |
| ENSG00000166145 | SPINT1  | serine peptidase inhibitor, Kunitz type 1 [Source:HGNC Symbol;Acc:HGNC:11246]                         | protein_coding | -0.856 | -1.288 | -0.432 | -     | 0.81171 | 0.025 | brown |
| ENSG00000166507 | NDST2   | N-deacetylase and N-sulfotransferase 2 [Source:HGNC Symbol;Acc:HGNC:7681]                             | protein_coding | -0.144 | -0.462 | -0.318 | 2.006 | 4.399   | 0.017 | brown |
| ENSG00000166925 | TSC22D4 | TSC22 domain family member 4 [Source:HGNC Symbol;Acc:HGNC:21696]                                      | protein_coding | 0.243  | 0.118  | -0.125 | 3.740 | 4.501   | 0.016 | brown |
| ENSG00000166949 | SMAD3   | SMAD family member 3 [Source:HGNC Symbol;Acc:HGNC:6769]                                               | protein_coding | -0.166 | -0.377 | -0.211 | 4.335 | 4.658   | 0.014 | brown |
| ENSG00000169604 | ANTXR1  | ANTXR cell adhesion molecule 1 [Source:HGNC Symbol;Acc:HGNC:21014]                                    | protein_coding | -0.352 | -0.408 | -0.057 | 5.886 | 6.827   | 0.002 | brown |
| ENSG00000174348 | PODN    | podocan [Source:HGNC Symbol;Acc:HGNC:23174]                                                           | protein_coding | -0.205 | -0.460 | -0.255 | 4.579 | 6.754   | 0.002 | brown |
| ENSG00000175198 | PCCA    | propionyl-CoA carboxylase subunit alpha [Source:HGNC Symbol;Acc:HGNC:8653]                            | protein_coding | -0.298 | -0.226 | 0.072  | 3.637 | 3.840   | 0.028 | brown |
| ENSG00000176209 | SMIM19  | small integral membrane protein 19 [Source:HGNC Symbol;Acc:HGNC:25166]                                | protein_coding | -0.067 | 0.198  | 0.265  | 3.241 | 3.990   | 0.024 | brown |
| ENSG00000178028 | DMAP1   | DNA methyltransferase 1 associated protein 1 [Source:HGNC Symbol;Acc:HGNC:18291]                      | protein_coding | 0.323  | 0.182  | -0.141 | 2.342 | 4.047   | 0.023 | brown |
| ENSG00000180530 | NRIP1   | nuclear receptor interacting protein 1 [Source:HGNC Symbol;Acc:HGNC:8001]                             | protein_coding | -0.162 | -0.290 | -0.128 | 4.880 | 4.431   | 0.017 | brown |
| ENSG00000183117 | CSMD1   | CUB and Sushi multiple domains 1 [Source:HGNC Symbol;Acc:HGNC:14026]                                  | protein_coding | 1.358  | 3.326  | 1.968  | -     | 2.13199 | 0.002 | brown |
| ENSG00000184060 | ADAP2   | ArfGAP with dual PH domains 2 [Source:HGNC Symbol;Acc:HGNC:16487]                                     | protein_coding | -0.273 | -0.534 | -0.262 | 2.402 | 3.471   | 0.038 | brown |



|                |            |                                                                                                          |                        |        |        |        |        |       |       |       |
|----------------|------------|----------------------------------------------------------------------------------------------------------|------------------------|--------|--------|--------|--------|-------|-------|-------|
| ENSG0000186818 | LILRB4     | leukocyte immunoglobulin like receptor B4 [Source:HGNC Symbol;Acc:HGNC:6608]                             | protein_coding         | -0.387 | -0.579 | -0.192 | 0.953  | 3.549 | 0.036 | brown |
| ENSG0000187210 | GCNT1      | glucosaminyl (N-acetyl) transferase 1 [Source:HGNC Symbol;Acc:HGNC:4203]                                 | protein_coding         | 0.500  | -0.476 | -0.976 | 1.811  | 3.623 | 0.033 | brown |
| ENSG0000189046 | ALKBH2     | alkB homolog 2, alpha-ketoglutarate dependent dioxygenase [Source:HGNC Symbol;Acc:HGNC:32487]            | protein_coding         | 0.176  | 0.427  | 0.250  | 0.965  | 3.254 | 0.046 | brown |
| ENSG0000196368 | NUDT11     | nudix hydrolase 11 [Source:HGNC Symbol;Acc:HGNC:18011]                                                   | protein_coding         | -0.758 | -0.844 | -0.085 | -2.243 | 3.170 | 0.050 | brown |
| ENSG0000197021 | EOLA2      | endothelium and lymphocyte associated ASCH domain 2 [Source:HGNC Symbol;Acc:HGNC:17402]                  | protein_coding         | 0.163  | 0.403  | 0.240  | 1.762  | 3.938 | 0.025 | brown |
| ENSG0000197766 | CFD        | complement factor D [Source:HGNC Symbol;Acc:HGNC:2771]                                                   | protein_coding         | -0.182 | -0.679 | -0.497 | 5.791  | 4.183 | 0.020 | brown |
| ENSG0000197863 | ZNF790     | zinc finger protein 790 [Source:HGNC Symbol;Acc:HGNC:33114]                                              | protein_coding         | 0.179  | 0.472  | 0.293  | 2.315  | 4.148 | 0.021 | brown |
| ENSG0000198121 | LPAR1      | lysophosphatidic acid receptor 1 [Source:HGNC Symbol;Acc:HGNC:3166]                                      | protein_coding         | -0.278 | -0.328 | -0.050 | 4.301  | 3.732 | 0.030 | brown |
| ENSG0000198744 | MTCO3P12   | MT-CO3 pseudogene 12 [Source:HGNC Symbol;Acc:HGNC:52042]                                                 | unprocessed_pseudogene | 0.451  | 2.302  | 1.850  | 1.088  | 6.646 | 0.003 | brown |
| ENSG0000198863 | RUNDC1     | RUN domain containing 1 [Source:HGNC Symbol;Acc:HGNC:25418]                                              | protein_coding         | 0.174  | 0.305  | 0.130  | 2.210  | 3.819 | 0.028 | brown |
| ENSG0000205037 | AC134312.1 | novel transcript                                                                                         | lncRNA                 | 0.355  | 1.566  | 1.211  | -2.261 | 4.727 | 0.013 | brown |
| ENSG0000205336 | ADGRG1     | adhesion G protein-coupled receptor G1 [Source:HGNC Symbol;Acc:HGNC:4512]                                | protein_coding         | 0.720  | 0.657  | -0.063 | 1.657  | 5.916 | 0.005 | brown |
| ENSG0000224043 | CCNT2-AS1  | CCNT2 antisense RNA 1 [Source:HGNC Symbol;Acc:HGNC:40130]                                                | lncRNA                 | 0.739  | 0.782  | 0.042  | 0.912  | 7.934 | 0.001 | brown |
| ENSG0000223565 | H3P6       | H3 histone pseudogene 6 [Source:HGNC Symbol;Acc:HGNC:42980]                                              | processed_pseudogene   | 0.112  | 0.591  | 0.480  | -1.586 | 5.247 | 0.008 | brown |
| ENSG0000235823 | OLMALINC   | oligodendrocyte maturation-associated long intergenic non-coding RNA [Source:HGNC Symbol;Acc:HGNC:28060] | lncRNA                 | 0.323  | 0.159  | -0.164 | 1.695  | 3.276 | 0.045 | brown |
| ENSG0000236824 | BCYRN1     | brain cytoplasmic RNA 1 [Source:HGNC Symbol;Acc:HGNC:1022]                                               | scRNA                  | 0.427  | 0.303  | -0.124 | 3.654  | 3.308 | 0.044 | brown |
| ENSG0000237596 | AL138828.1 | novel transcript                                                                                         | lncRNA                 | 0.320  | 0.949  | 0.629  | 1.742  | 4.358 | 0.018 | brown |
| ENSG0000245812 | LINC02202  | long intergenic non-protein coding RNA 2202 [Source:HGNC Symbol;Acc:HGNC:53068]                          | lncRNA                 | 0.367  | -0.608 | -0.975 | -0.475 | 4.117 | 0.022 | brown |
| ENSG0000248333 | CDK11B     | cyclin dependent kinase 11B [Source:HGNC Symbol;Acc:HGNC:1729]                                           | protein_coding         | 0.268  | 0.292  | 0.023  | 2.522  | 5.361 | 0.008 | brown |
| ENSG0000253710 | ALG11      | ALG11 alpha-1,2-mannosyltransferase [Source:HGNC Symbol;Acc:HGNC:32456]                                  | protein_coding         | 0.243  | 0.146  | -0.097 | 4.173  | 4.942 | 0.011 | brown |
| ENSG0000258636 | AL121821.2 | novel transcript                                                                                         | lncRNA                 | -0.696 | -0.409 | 0.288  | -0.518 | 3.281 | 0.045 | brown |
| ENSG0000258818 | RNASE4     | ribonuclease A family member 4 [Source:HGNC Symbol;Acc:HGNC:10047]                                       | protein_coding         | -0.281 | -0.446 | -0.165 | 3.339  | 3.580 | 0.035 | brown |

|                 |            |                                                                                                     |                                    |        |        |        |        |       |       |       |
|-----------------|------------|-----------------------------------------------------------------------------------------------------|------------------------------------|--------|--------|--------|--------|-------|-------|-------|
| ENSG00000267069 | AP005264.1 | novel transcript                                                                                    | lncRNA                             | 0.646  | 0.898  | 0.252  | -1.013 | 4.787 | 0.012 | brown |
| ENSG00000267530 | LINC01836  | long intergenic non-protein coding RNA 1836 [Source:HGNC Symbol;Acc:HGNC:52652]                     | lncRNA                             | 0.831  | 1.092  | 0.261  | -2.776 | 3.318 | 0.044 | brown |
| ENSG00000269896 | AL513477.1 | small nuclear ribonucleoprotein N (SNRPN) pseudogene                                                | transcribed_processed_pseudogene   | 0.114  | -1.026 | -1.140 | -2.327 | 4.656 | 0.014 | brown |
| ENSG00000275835 | TUBGCP5    | tubulin gamma complex associated protein 5 [Source:HGNC Symbol;Acc:HGNC:18600]                      | protein_coding                     | 0.353  | 0.178  | -0.176 | 2.950  | 4.410 | 0.017 | brown |
| ENSG00000279030 | AC007336.3 | novel transcript                                                                                    | TEC                                | -0.764 | -0.685 | 0.079  | -2.255 | 3.764 | 0.029 | brown |
| ENSG00000284649 | AC009093.8 | BTG3 associated nuclear protein (BANP) pseudogene                                                   | transcribed_unprocessed_pseudogene | 0.237  | 1.730  | 1.494  | -2.906 | 5.166 | 0.009 | brown |
| ENSG00000010319 | SEMA3G     | semaphorin 3G [Source:HGNC Symbol;Acc:HGNC:30400]                                                   | protein_coding                     | 0.510  | 0.578  | 0.067  | 2.984  | 3.657 | 0.032 | green |
| ENSG00000067208 | EVI5       | ecotropic viral integration site 5 [Source:HGNC Symbol;Acc:HGNC:3501]                               | protein_coding                     | -0.251 | -0.104 | 0.148  | 4.886  | 3.865 | 0.027 | green |
| ENSG00000074582 | BCS1L      | BCS1 homolog, ubiquinol-cytochrome c reductase complex chaperone [Source:HGNC Symbol;Acc:HGNC:1020] | protein_coding                     | 0.281  | 0.165  | -0.116 | 2.151  | 3.212 | 0.048 | green |
| ENSG00000102924 | CBLN1      | cerebellin 1 precursor [Source:HGNC Symbol;Acc:HGNC:1543]                                           | protein_coding                     | 0.939  | 0.796  | -0.143 | -0.031 | 5.556 | 0.006 | green |
| ENSG00000113361 | CDH6       | cadherin 6 [Source:HGNC Symbol;Acc:HGNC:1765]                                                       | protein_coding                     | 0.563  | 0.792  | 0.229  | 2.100  | 4.809 | 0.012 | green |
| ENSG00000124785 | NRN1       | neuritin 1 [Source:HGNC Symbol;Acc:HGNC:17972]                                                      | protein_coding                     | 0.392  | 0.308  | -0.084 | 2.151  | 3.896 | 0.026 | green |
| ENSG00000125851 | PCSK2      | proprotein convertase subtilisin/kexin type 2 [Source:HGNC Symbol;Acc:HGNC:8744]                    | protein_coding                     | 0.720  | 0.163  | -0.558 | 1.669  | 6.609 | 0.003 | green |
| ENSG00000125871 | MGME1      | mitochondrial genome maintenance exonuclease 1 [Source:HGNC Symbol;Acc:HGNC:16205]                  | protein_coding                     | 0.309  | 0.399  | 0.090  | 1.779  | 3.214 | 0.048 | green |
| ENSG00000134460 | IL2RA      | interleukin 2 receptor subunit alpha [Source:HGNC Symbol;Acc:HGNC:6008]                             | protein_coding                     | -1.035 | -0.571 | 0.464  | -0.255 | 4.196 | 0.020 | green |
| ENSG00000142748 | FCN3       | ficolin 3 [Source:HGNC Symbol;Acc:HGNC:3625]                                                        | protein_coding                     | 1.025  | 0.696  | -0.329 | -1.667 | 4.038 | 0.023 | green |
| ENSG00000143248 | RGS5       | regulator of G protein signaling 5 [Source:HGNC Symbol;Acc:HGNC:10001]                              | protein_coding                     | 0.467  | 0.313  | -0.154 | 7.130  | 5.585 | 0.006 | green |
| ENSG00000144057 | ST6GAL2    | ST6 beta-galactoside alpha-2,6-sialyltransferase 2 [Source:HGNC Symbol;Acc:HGNC:10861]              | protein_coding                     | 0.759  | -0.586 | -1.346 | 0.271  | 6.993 | 0.002 | green |
| ENSG00000165810 | BTNL9      | butyrophilin like 9 [Source:HGNC Symbol;Acc:HGNC:24176]                                             | protein_coding                     | 0.654  | 0.657  | 0.003  | 2.582  | 3.258 | 0.046 | green |
| ENSG00000168874 | ATOX1A     | atonal bHLH transcription factor 8 [Source:HGNC Symbol;Acc:HGNC:24126]                              | protein_coding                     | 0.171  | -0.024 | -0.196 | 4.236  | 3.422 | 0.040 | green |
| ENSG00000177042 | TMEM80     | transmembrane protein 80 [Source:HGNC Symbol;Acc:HGNC:27453]                                        | protein_coding                     | 0.374  | 0.666  | 0.292  | 1.412  | 4.596 | 0.014 | green |
| ENSG00000183153 | GJD3       | gap junction protein delta 3 [Source:HGNC Symbol;Acc:HGNC:19147]                                    | protein_coding                     | 0.517  | 0.313  | -0.204 | 0.332  | 3.644 | 0.033 | green |

|                 |             |                                                                                            |                                    |        |        |        |        |        |       |              |
|-----------------|-------------|--------------------------------------------------------------------------------------------|------------------------------------|--------|--------|--------|--------|--------|-------|--------------|
| ENSG00000198597 | ZNF536      | zinc finger protein 536 [Source:HGNC Symbol;Acc:HGNC:29025]                                | protein_coding                     | 0.450  | 0.045  | -0.405 | 1.545  | 3.998  | 0.024 | green        |
| ENSG00000198712 | MT-CO2      | mitochondrially encoded cytochrome c oxidase II [Source:HGNC Symbol;Acc:HGNC:7421]         | protein_coding                     | 0.208  | 0.309  | 0.101  | 10.360 | 3.193  | 0.049 | green        |
| ENSG00000205863 | C1QTNF9B    | C1q and TNF related 9B [Source:HGNC Symbol;Acc:HGNC:34072]                                 | protein_coding                     | 0.112  | 1.365  | 1.253  | -3.033 | 3.837  | 0.028 | green        |
| ENSG00000258819 | LINC02289   | long intergenic non-protein coding RNA 2289 [Source:HGNC Symbol;Acc:HGNC:53205]            | lncRNA                             | 0.735  | 0.637  | -0.098 | -1.247 | 3.813  | 0.028 | green        |
| ENSG00000275385 | CCL18       | C-C motif chemokine ligand 18 [Source:HGNC Symbol;Acc:HGNC:10616]                          | protein_coding                     | -1.550 | -0.627 | 0.923  | -1.864 | 3.781  | 0.029 | green        |
| ENSG00000279249 | AC007614.1  | novel transcript, antisense to CBLN1                                                       | lncRNA                             | 0.822  | -0.104 | -0.927 | -2.156 | 4.502  | 0.016 | green        |
| ENSG00000158578 | ALAS2       | 5'-aminolevulinate synthase 2 [Source:HGNC Symbol;Acc:HGNC:397]                            | protein_coding                     | 1.281  | 1.069  | -0.212 | -0.792 | 3.639  | 0.033 | green yellow |
| ENSG00000188536 | HBA2        | hemoglobin subunit alpha 2 [Source:HGNC Symbol;Acc:HGNC:4824]                              | protein_coding                     | 0.663  | 1.364  | 0.700  | 5.305  | 4.672  | 0.013 | green yellow |
| ENSG00000206172 | HBA1        | hemoglobin subunit alpha 1 [Source:HGNC Symbol;Acc:HGNC:4823]                              | protein_coding                     | 0.594  | 1.228  | 0.634  | 5.314  | 3.665  | 0.032 | green yellow |
| ENSG00000215559 | ANKRD20A11P | ankyrin repeat domain 20 family member A11, pseudogene [Source:HGNC Symbol;Acc:HGNC:42024] | transcribed_unprocessed_pseudogene | -1.534 | -0.955 | 0.578  | -2.853 | 4.308  | 0.018 | green yellow |
| ENSG00000232573 | RPL3P4      | ribosomal protein L3 pseudogene 4 [Source:HGNC Symbol;Acc:HGNC:19805]                      | processed_pseudogene               | 1.997  | 0.091  | -1.906 | -2.570 | 5.055  | 0.010 | green yellow |
| ENSG00000254692 | AL136295.1  | novel protein                                                                              | protein_coding                     | 2.016  | 2.837  | 0.821  | -2.450 | 4.636  | 0.014 | green yellow |
| ENSG00000280571 | AC006059.2  | novel protein                                                                              | protein_coding                     | 0.218  | -3.698 | -3.916 | 0.132  | 18.007 | 0.000 | green yellow |
| ENSG00000054179 | ENTPD2      | ectonucleoside triphosphate diphosphohydrolase 2 [Source:HGNC Symbol;Acc:HGNC:3364]        | protein_coding                     | 0.994  | 0.405  | -0.590 | -2.448 | 4.967  | 0.010 | grey         |
| ENSG00000121060 | TRIM25      | tripartite motif containing 25 [Source:HGNC Symbol;Acc:HGNC:12932]                         | protein_coding                     | 0.306  | 0.434  | 0.128  | 3.401  | 3.250  | 0.047 | grey         |
| ENSG00000154040 | CABYR       | calcium binding tyrosine phosphorylation regulated [Source:HGNC Symbol;Acc:HGNC:15569]     | protein_coding                     | -1.001 | -0.324 | 0.677  | -2.742 | 4.271  | 0.019 | grey         |
| ENSG00000164308 | ERAP2       | endoplasmic reticulum aminopeptidase 2 [Source:HGNC Symbol;Acc:HGNC:29499]                 | protein_coding                     | 0.682  | -0.547 | -1.229 | 3.103  | 3.533  | 0.036 | grey         |
| ENSG00000166140 | ZFYVE19     | zinc finger FYVE-type containing 19 [Source:HGNC Symbol;Acc:HGNC:20758]                    | protein_coding                     | -0.197 | 0.118  | 0.316  | 1.987  | 3.646  | 0.033 | grey         |
| ENSG00000228252 | COL6A4P2    | collagen type VI alpha 4 pseudogene 2 [Source:HGNC Symbol;Acc:HGNC:38501]                  | transcribed_unitary_pseudogene     | 0.843  | -0.214 | -1.056 | -2.876 | 3.181  | 0.049 | grey         |

|                 |            |                                                                                      |                        |        |        |        |        |       |       |         |
|-----------------|------------|--------------------------------------------------------------------------------------|------------------------|--------|--------|--------|--------|-------|-------|---------|
| ENSG0000235535  | TRDN-AS1   | TRDN antisense RNA 1 [Source:HGNC Symbol;Acc:HGNC:40592]                             | lncRNA                 | -0.590 | 0.023  | 0.612  | 2.529  | 4.122 | 0.022 | grey    |
| ENSG0000261175  | LINC02188  | long intergenic non-protein coding RNA 2188 [Source:HGNC Symbol;Acc:HGNC:53050]      | lncRNA                 | -0.645 | 0.615  | 1.260  | -2.862 | 4.171 | 0.021 | grey    |
| ENSG0000266993  | AL050343.2 | novel transcript, antisense to NRD1                                                  | lncRNA                 | -0.143 | -1.296 | -1.153 | -2.139 | 4.207 | 0.020 | grey    |
| ENSG0000283809  | AC007326.4 | novel protein                                                                        | protein_coding         | -1.155 | -0.231 | 0.924  | -1.985 | 3.292 | 0.045 | grey    |
| ENSG00001110880 | CORO1C     | coronin 1C [Source:HGNC Symbol;Acc:HGNC:2254]                                        | protein_coding         | -0.206 | -0.193 | 0.012  | 4.413  | 3.885 | 0.027 | magenta |
| ENSG00001113966 | ARL6       | ADP ribosylation factor like GTPase 6 [Source:HGNC Symbol;Acc:HGNC:13210]            | protein_coding         | -0.282 | -0.463 | -0.182 | 1.603  | 3.169 | 0.050 | magenta |
| ENSG0000142856  | ITGB3BP    | integrin subunit beta 3 binding protein [Source:HGNC Symbol;Acc:HGNC:6157]           | protein_coding         | -0.698 | -0.577 | 0.121  | 1.007  | 6.449 | 0.003 | magenta |
| ENSG0000151322  | NPAS3      | neuronal PAS domain protein 3 [Source:HGNC Symbol;Acc:HGNC:19311]                    | protein_coding         | -0.765 | -0.575 | 0.190  | 0.469  | 3.618 | 0.034 | magenta |
| ENSG0000159712  | ANKRD18CP  | ankyrin repeat domain 18C, pseudogene [Source:HGNC Symbol;Acc:HGNC:43601]            | unprocessed_pseudogene | -1.036 | -0.445 | 0.591  | -2.379 | 3.475 | 0.038 | magenta |
| ENSG0000196504  | PRPF40A    | pre-mRNA processing factor 40 homolog A [Source:HGNC Symbol;Acc:HGNC:16463]          | protein_coding         | 0.262  | 0.143  | -0.119 | 5.011  | 5.077 | 0.010 | magenta |
| ENSG0000259001  | AL355075.4 | ribonuclease P RNA component H1                                                      | lncRNA                 | -0.425 | -0.696 | -0.272 | 3.465  | 3.434 | 0.039 | magenta |
| ENSG0000268433  | MTDHP3     | metadherin pseudogene 3 [Source:HGNC Symbol;Acc:HGNC:52359]                          | processed_pseudogene   | -1.089 | 0.149  | 1.238  | -2.379 | 6.090 | 0.004 | magenta |
| ENSG0000270757  | HSPE1-MOB4 | HSPE1-MOB4 readthrough [Source:HGNC Symbol;Acc:HGNC:49184]                           | protein_coding         | 0.999  | 2.525  | 1.525  | -3.277 | 3.399 | 0.041 | magenta |
| ENSG0000277209  | RPPH1      | ribonuclease P RNA component H1 [Source:HGNC Symbol;Acc:HGNC:19273]                  | ribozyme               | -0.323 | -0.626 | -0.303 | 9.457  | 4.387 | 0.017 | magenta |
| ENSG00000075213 | SEMA3A     | semaphorin 3A [Source:HGNC Symbol;Acc:HGNC:10723]                                    | protein_coding         | 0.074  | 0.540  | 0.466  | 2.826  | 4.255 | 0.019 | pink    |
| ENSG00001112782 | CLIC5      | chloride intracellular channel 5 [Source:HGNC Symbol;Acc:HGNC:13517]                 | protein_coding         | 0.224  | -0.007 | -0.231 | 6.753  | 5.095 | 0.009 | pink    |
| ENSG0000123405  | NFE2       | nuclear factor, erythroid 2 [Source:HGNC Symbol;Acc:HGNC:7780]                       | protein_coding         | 0.820  | 1.177  | 0.356  | -1.642 | 3.686 | 0.032 | pink    |
| ENSG0000153443  | UBALD1     | UBA like domain containing 1 [Source:HGNC Symbol;Acc:HGNC:29576]                     | protein_coding         | -0.281 | -0.307 | -0.027 | 1.191  | 3.216 | 0.048 | pink    |
| ENSG0000164116  | GUCY1A1    | guanylate cyclase 1 soluble subunit alpha 1 [Source:HGNC Symbol;Acc:HGNC:4685]       | protein_coding         | 0.147  | 0.331  | 0.184  | 5.868  | 3.419 | 0.040 | pink    |
| ENSG0000183828  | NUDT14     | nudix hydrolase 14 [Source:HGNC Symbol;Acc:HGNC:20141]                               | protein_coding         | 0.195  | -0.163 | -0.359 | 1.578  | 3.477 | 0.038 | pink    |
| ENSG0000196781  | TLE1       | TLE family member 1, transcriptional corepressor [Source:HGNC Symbol;Acc:HGNC:11837] | protein_coding         | -0.240 | 0.093  | 0.334  | 3.139  | 3.421 | 0.040 | pink    |
| ENSG0000197249  | SERPINA1   | serpin family A member 1 [Source:HGNC Symbol;Acc:HGNC:8941]                          | protein_coding         | 0.291  | 0.769  | 0.477  | 1.284  | 3.742 | 0.030 | pink    |

|                 |            |                                                                                          |                                    |        |        |        |        |       |       |        |
|-----------------|------------|------------------------------------------------------------------------------------------|------------------------------------|--------|--------|--------|--------|-------|-------|--------|
| ENSG00000206337 | HCP5       | HLA complex P5 [Source:HGNC Symbol;Acc:HGNC:21659]                                       | lncRNA                             | 0.358  | 0.227  | -0.131 | 2.918  | 4.207 | 0.020 | pink   |
| ENSG00000206503 | HLA-A      | major histocompatibility complex, class I, A [Source:HGNC Symbol;Acc:HGNC:4931]          | protein_coding                     | 0.318  | 0.180  | -0.138 | 7.089  | 4.012 | 0.024 | pink   |
| ENSG00000211598 | IGKV4-1    | immunoglobulin kappa variable 4-1 [Source:HGNC Symbol;Acc:HGNC:5834]                     | IG_V_gene                          | -2.074 | -1.365 | 0.709  | -0.574 | 3.245 | 0.047 | pink   |
| ENSG00000211938 | IGHV3-7    | immunoglobulin heavy variable 3-7 [Source:HGNC Symbol;Acc:HGNC:5620]                     | IG_V_gene                          | 1.385  | 2.422  | 1.037  | -1.426 | 3.262 | 0.046 | pink   |
| ENSG00000254838 | GVINP1     | GTPase, very large interferon inducible pseudogene 1 [Source:HGNC Symbol;Acc:HGNC:25813] | transcribed_unprocessed_pseudogene | 0.423  | 0.246  | -0.177 | 2.093  | 4.444 | 0.016 | pink   |
| ENSG00000287129 | AC097500.1 | novel transcript                                                                         | lncRNA                             | -0.719 | 0.140  | 0.859  | -2.475 | 3.958 | 0.025 | pink   |
| ENSG00000100031 | GGT1       | gamma-glutamyltransferase 1 [Source:HGNC Symbol;Acc:HGNC:4250]                           | protein_coding                     | -0.739 | -1.651 | -0.912 | -0.933 | 3.449 | 0.039 | purple |
| ENSG00000112972 | HMGCS1     | 3-hydroxy-3-methylglutaryl-CoA synthase 1 [Source:HGNC Symbol;Acc:HGNC:5007]             | protein_coding                     | -0.034 | 0.411  | 0.445  | 3.535  | 3.296 | 0.045 | purple |
| ENSG00000121858 | TNFSF10    | TNF superfamily member 10 [Source:HGNC Symbol;Acc:HGNC:11925]                            | protein_coding                     | 0.264  | -0.060 | -0.324 | 4.139  | 4.796 | 0.012 | purple |
| ENSG00000130164 | LDLR       | low density lipoprotein receptor [Source:HGNC Symbol;Acc:HGNC:6547]                      | protein_coding                     | -0.051 | 0.914  | 0.965  | 3.595  | 5.668 | 0.006 | purple |
| ENSG00000165186 | PTCHD1     | patched domain containing 1 [Source:HGNC Symbol;Acc:HGNC:26392]                          | protein_coding                     | 0.744  | 0.113  | -0.631 | -0.229 | 3.271 | 0.046 | purple |
| ENSG00000171657 | GPR82      | G protein-coupled receptor 82 [Source:HGNC Symbol;Acc:HGNC:4533]                         | protein_coding                     | 0.312  | -0.740 | -1.052 | -1.881 | 3.665 | 0.032 | purple |
| ENSG00000186480 | INSIG1     | insulin induced gene 1 [Source:HGNC Symbol;Acc:HGNC:6083]                                | protein_coding                     | -0.160 | 0.383  | 0.544  | 3.830  | 3.718 | 0.031 | purple |
| ENSG00000213523 | SRA1       | steroid receptor RNA activator 1 [Source:HGNC Symbol;Acc:HGNC:11281]                     | protein_coding                     | 0.014  | 0.254  | 0.240  | 2.751  | 3.229 | 0.047 | purple |
| ENSG00000243364 | EFNA4      | ephrin A4 [Source:HGNC Symbol;Acc:HGNC:3224]                                             | protein_coding                     | 0.218  | -0.360 | -0.578 | -0.823 | 3.544 | 0.036 | purple |
| ENSG00000005801 | ZNF195     | zinc finger protein 195 [Source:HGNC Symbol;Acc:HGNC:12986]                              | protein_coding                     | -0.233 | -0.006 | 0.227  | 2.624  | 3.900 | 0.026 | red    |
| ENSG00000009307 | CSDE1      | cold shock domain containing E1 [Source:HGNC Symbol;Acc:HGNC:29905]                      | protein_coding                     | -0.043 | 0.060  | 0.103  | 8.481  | 3.570 | 0.035 | red    |
| ENSG00000073464 | CLCN4      | chloride voltage-gated channel 4 [Source:HGNC Symbol;Acc:HGNC:2022]                      | protein_coding                     | 0.224  | 0.293  | 0.068  | 4.630  | 4.355 | 0.018 | red    |
| ENSG00000077157 | PPP1R12B   | protein phosphatase 1 regulatory subunit 12B [Source:HGNC Symbol;Acc:HGNC:7619]          | protein_coding                     | 0.062  | 0.282  | 0.220  | 9.773  | 4.332 | 0.018 | red    |
| ENSG00000080166 | DCT        | dopachrome tautomerase [Source:HGNC Symbol;Acc:HGNC:2709]                                | protein_coding                     | -0.202 | 1.034  | 1.236  | -1.950 | 4.340 | 0.018 | red    |
| ENSG00000115138 | POMC       | proopiomelanocortin [Source:HGNC Symbol;Acc:HGNC:9201]                                   | protein_coding                     | 0.250  | 0.960  | 0.710  | -0.547 | 5.196 | 0.009 | red    |
| ENSG00000128482 | RNF112     | ring finger protein 112 [Source:HGNC Symbol;Acc:HGNC:12968]                              | protein_coding                     | 0.337  | -0.295 | -0.633 | -0.290 | 3.368 | 0.042 | red    |

|                 |               |                                                                                                 |                |        |        |        |        |       |       |           |
|-----------------|---------------|-------------------------------------------------------------------------------------------------|----------------|--------|--------|--------|--------|-------|-------|-----------|
| ENSG00000132274 | TRIM22        | tripartite motif containing 22 [Source:HGNC Symbol;Acc:HGNC:16379]                              | protein_coding | 0.042  | -0.315 | -0.357 | 4.319  | 3.177 | 0.050 | red       |
| ENSG00000135930 | EIF4E2        | eukaryotic translation initiation factor 4E family member 2 [Source:HGNC Symbol;Acc:HGNC:3293]  | protein_coding | -0.204 | -0.371 | -0.166 | 3.815  | 3.348 | 0.043 | red       |
| ENSG00000135931 | ARMC9         | armadillo repeat containing 9 [Source:HGNC Symbol;Acc:HGNC:20730]                               | protein_coding | -0.431 | -0.804 | -0.372 | 1.067  | 4.524 | 0.015 | red       |
| ENSG00000174437 | ATP2A2        | ATPase sarcoplasmic/endoplasmic reticulum Ca2+ transporting 2 [Source:HGNC Symbol;Acc:HGNC:812] | protein_coding | 0.056  | 0.275  | 0.219  | 9.765  | 3.624 | 0.033 | red       |
| ENSG00000183508 | TENT5C        | terminal nucleotidyltransferase 5C [Source:HGNC Symbol;Acc:HGNC:24712]                          | protein_coding | 0.209  | 0.367  | 0.158  | 4.191  | 5.090 | 0.009 | red       |
| ENSG00000189283 | FHIT          | fragile histidine triad diadenosine triphosphatase [Source:HGNC Symbol;Acc:HGNC:3701]           | protein_coding | 0.301  | 0.773  | 0.473  | 1.148  | 3.877 | 0.027 | red       |
| ENSG00000189419 | SPATA41       | spermatogenesis associated 41 [Source:HGNC Symbol;Acc:HGNC:48613]                               | lncRNA         | 0.132  | -1.343 | -1.475 | -1.872 | 7.503 | 0.001 | red       |
| ENSG00000196196 | HRCT1         | histidine rich carboxyl terminus 1 [Source:HGNC Symbol;Acc:HGNC:33872]                          | protein_coding | -0.402 | -1.096 | -0.694 | -1.425 | 3.717 | 0.031 | red       |
| ENSG00000213928 | IRF9          | interferon regulatory factor 9 [Source:HGNC Symbol;Acc:HGNC:6131]                               | protein_coding | 0.259  | -0.045 | -0.304 | 3.190  | 3.321 | 0.044 | red       |
| ENSG00000226816 | AC005082.1    | novel transcript                                                                                | lncRNA         | -0.414 | 0.645  | 1.059  | -1.461 | 4.575 | 0.015 | red       |
| ENSG00000249378 | LINC01060     | long intergenic non-protein coding RNA 1060 [Source:HGNC Symbol;Acc:HGNC:49081]                 | lncRNA         | 0.410  | -1.306 | -1.716 | -3.382 | 3.473 | 0.038 | red       |
| ENSG00000277639 | AC007906.2    | novel protein                                                                                   | protein_coding | 0.056  | -1.114 | -1.170 | -1.771 | 3.722 | 0.031 | red       |
| ENSG00000286039 | AC093849.2    | novel transcript                                                                                | lncRNA         | -0.034 | 0.324  | 0.358  | 2.186  | 4.220 | 0.020 | red       |
| ENSG00000003402 | CFLAR         | CASP8 and FADD like apoptosis regulator [Source:HGNC Symbol;Acc:HGNC:1876]                      | protein_coding | 0.191  | 0.220  | 0.029  | 6.684  | 3.404 | 0.041 | turquoise |
| ENSG00000008988 | RPS20         | ribosomal protein S20 [Source:HGNC Symbol;Acc:HGNC:10405]                                       | protein_coding | -0.159 | -0.097 | 0.062  | 7.193  | 3.215 | 0.048 | turquoise |
| ENSG00000047849 | MAP4          | microtubule associated protein 4 [Source:HGNC Symbol;Acc:HGNC:6862]                             | protein_coding | 0.211  | 0.098  | -0.113 | 8.418  | 3.812 | 0.028 | turquoise |
| ENSG00000068781 | STON1-GTF2A1L | STON1-GTF2A1L readthrough [Source:HGNC Symbol;Acc:HGNC:30651]                                   | protein_coding | 0.795  | 1.183  | 0.388  | 1.178  | 3.587 | 0.034 | turquoise |
| ENSG00000076706 | MCAM          | melanoma cell adhesion molecule [Source:HGNC Symbol;Acc:HGNC:6934]                              | protein_coding | 0.240  | 0.122  | -0.118 | 6.150  | 6.109 | 0.004 | turquoise |
| ENSG00000082684 | SEMA5B        | semaphorin 5B [Source:HGNC Symbol;Acc:HGNC:10737]                                               | protein_coding | 0.773  | 0.902  | 0.129  | 1.011  | 5.696 | 0.006 | turquoise |
| ENSG00000089157 | RPLP0         | ribosomal protein lateral stalk subunit P0 [Source:HGNC Symbol;Acc:HGNC:10371]                  | protein_coding | -0.183 | -0.182 | 0.001  | 7.379  | 3.232 | 0.047 | turquoise |
| ENSG00000091622 | PITPNM3       | PITPNM family member 3 [Source:HGNC Symbol;Acc:HGNC:21043]                                      | protein_coding | 0.602  | 0.919  | 0.317  | 1.025  | 4.251 | 0.019 | turquoise |
| ENSG00000092529 | CAPN3         | calpain 3 [Source:HGNC Symbol;Acc:HGNC:1480]                                                    | protein_coding | 0.484  | 0.235  | -0.249 | 1.996  | 3.428 | 0.040 | turquoise |

|                 |           |                                                                                      |                |        |        |        |       |       |       |           |
|-----------------|-----------|--------------------------------------------------------------------------------------|----------------|--------|--------|--------|-------|-------|-------|-----------|
| ENSG00000095637 | SORBS1    | sorbin and SH3 domain containing 1 [Source:HGNC Symbol;Acc:HGNC:14565]               | protein_coding | 0.173  | 0.075  | -0.098 | 7.955 | 3.361 | 0.042 | turquoise |
| ENSG00000099282 | TSPAN15   | tetraspanin 15 [Source:HGNC Symbol;Acc:HGNC:23298]                                   | protein_coding | 0.448  | 0.384  | -0.064 | 1.459 | 3.883 | 0.027 | turquoise |
| ENSG00000100316 | RPL3      | ribosomal protein L3 [Source:HGNC Symbol;Acc:HGNC:10332]                             | protein_coding | -0.190 | -0.120 | 0.071  | 7.099 | 3.183 | 0.049 | turquoise |
| ENSG00000100836 | PABPN1    | poly(A) binding protein nuclear 1 [Source:HGNC Symbol;Acc:HGNC:8565]                 | protein_coding | 0.266  | 0.137  | -0.129 | 4.163 | 4.963 | 0.011 | turquoise |
| ENSG00000103245 | CIAO3     | cytosolic iron-sulfur assembly component 3 [Source:HGNC Symbol;Acc:HGNC:14179]       | protein_coding | 0.393  | 0.237  | -0.156 | 2.397 | 5.280 | 0.008 | turquoise |
| ENSG00000105723 | GSK3A     | glycogen synthase kinase 3 alpha [Source:HGNC Symbol;Acc:HGNC:4616]                  | protein_coding | 0.228  | 0.216  | -0.013 | 2.872 | 3.593 | 0.034 | turquoise |
| ENSG00000107263 | RAPGEF1   | Rap guanine nucleotide exchange factor 1 [Source:HGNC Symbol;Acc:HGNC:4568]          | protein_coding | 0.204  | 0.176  | -0.028 | 4.387 | 3.348 | 0.043 | turquoise |
| ENSG00000107798 | LIPA      | lipase A, lysosomal acid type [Source:HGNC Symbol;Acc:HGNC:6617]                     | protein_coding | -0.296 | -0.310 | -0.013 | 4.136 | 3.301 | 0.044 | turquoise |
| ENSG00000109099 | PMP22     | peripheral myelin protein 22 [Source:HGNC Symbol;Acc:HGNC:9118]                      | protein_coding | -0.184 | -0.196 | -0.012 | 5.509 | 4.483 | 0.016 | turquoise |
| ENSG00000110799 | VWF       | von Willebrand factor [Source:HGNC Symbol;Acc:HGNC:12726]                            | protein_coding | 0.381  | 0.270  | -0.110 | 7.554 | 5.778 | 0.005 | turquoise |
| ENSG00000112210 | RAB23     | RAB23, member RAS oncogene family [Source:HGNC Symbol;Acc:HGNC:14263]                | protein_coding | -0.206 | -0.055 | 0.151  | 3.798 | 3.472 | 0.038 | turquoise |
| ENSG00000112306 | RPS12     | ribosomal protein S12 [Source:HGNC Symbol;Acc:HGNC:10385]                            | protein_coding | -0.175 | -0.175 | 0.000  | 6.094 | 3.407 | 0.040 | turquoise |
| ENSG00000115145 | STAM2     | signal transducing adaptor molecule 2 [Source:HGNC Symbol;Acc:HGNC:11358]            | protein_coding | -0.126 | -0.206 | -0.080 | 4.280 | 3.791 | 0.029 | turquoise |
| ENSG00000115904 | SOS1      | SOS Ras/Rac guanine nucleotide exchange factor 1 [Source:HGNC Symbol;Acc:HGNC:11187] | protein_coding | 0.304  | 0.087  | -0.217 | 4.676 | 3.315 | 0.044 | turquoise |
| ENSG00000116251 | RPL22     | ribosomal protein L22 [Source:HGNC Symbol;Acc:HGNC:10315]                            | protein_coding | -0.197 | -0.135 | 0.061  | 5.952 | 4.906 | 0.011 | turquoise |
| ENSG00000118454 | ANKRD13C  | ankyrin repeat domain 13C [Source:HGNC Symbol;Acc:HGNC:25374]                        | protein_coding | -0.320 | -0.208 | 0.112  | 3.447 | 3.928 | 0.026 | turquoise |
| ENSG00000119655 | NPC2      | NPC intracellular cholesterol transporter 2 [Source:HGNC Symbol;Acc:HGNC:14537]      | protein_coding | -0.220 | -0.240 | -0.020 | 4.374 | 3.235 | 0.047 | turquoise |
| ENSG00000120451 | SNX19     | sorting nexin 19 [Source:HGNC Symbol;Acc:HGNC:21532]                                 | protein_coding | 0.243  | -0.017 | -0.260 | 5.310 | 5.058 | 0.010 | turquoise |
| ENSG00000123427 | EEF1AKMT3 | EEF1A lysine methyltransferase 3 [Source:HGNC Symbol;Acc:HGNC:24936]                 | protein_coding | -0.248 | -0.546 | -0.298 | 0.563 | 3.489 | 0.038 | turquoise |
| ENSG00000123636 | BAZ2B     | bromodomain adjacent to zinc finger domain 2B [Source:HGNC Symbol;Acc:HGNC:963]      | protein_coding | 0.203  | 0.225  | 0.022  | 5.083 | 3.306 | 0.044 | turquoise |
| ENSG00000128591 | FLNC      | filamin C [Source:HGNC Symbol;Acc:HGNC:3756]                                         | protein_coding | 0.243  | 0.147  | -0.095 | 7.905 | 3.422 | 0.040 | turquoise |
| ENSG00000128891 | CCDC32    | coiled-coil domain containing 32 [Source:HGNC Symbol;Acc:HGNC:28295]                 | protein_coding | 0.291  | 0.019  | -0.272 | 2.514 | 5.944 | 0.005 | turquoise |

|                |         |                                                                                                                      |                |        |        |        |        |       |       |           |
|----------------|---------|----------------------------------------------------------------------------------------------------------------------|----------------|--------|--------|--------|--------|-------|-------|-----------|
| ENSG0000130208 | APOC1   | apolipoprotein C1 [Source:HGNC Symbol;Acc:HGNC:607]                                                                  | protein_coding | -0.929 | -0.920 | 0.009  | -1.933 | 4.031 | 0.023 | turquoise |
| ENSG0000130338 | TULP4   | TUB like protein 4 [Source:HGNC Symbol;Acc:HGNC:15530]                                                               | protein_coding | -0.135 | 0.019  | 0.154  | 6.330  | 3.307 | 0.044 | turquoise |
| ENSG0000130816 | DNMT1   | DNA methyltransferase 1 [Source:HGNC Symbol;Acc:HGNC:2976]                                                           | protein_coding | 0.540  | 0.392  | -0.148 | 3.285  | 8.849 | 0.000 | turquoise |
| ENSG0000130818 | ZNF426  | zinc finger protein 426 [Source:HGNC Symbol;Acc:HGNC:20725]                                                          | protein_coding | -0.227 | -0.085 | 0.142  | 3.917  | 3.508 | 0.037 | turquoise |
| ENSG0000134030 | CTIF    | cap binding complex dependent translation initiation factor [Source:HGNC Symbol;Acc:HGNC:23925]                      | protein_coding | 0.303  | 0.197  | -0.106 | 4.061  | 3.707 | 0.031 | turquoise |
| ENSG0000134419 | RPS15A  | ribosomal protein S15a [Source:HGNC Symbol;Acc:HGNC:10389]                                                           | protein_coding | -0.199 | -0.202 | -0.003 | 6.226  | 3.430 | 0.040 | turquoise |
| ENSG0000135837 | CEP350  | centrosomal protein 350 [Source:HGNC Symbol;Acc:HGNC:24238]                                                          | protein_coding | 0.210  | 0.190  | -0.021 | 5.693  | 3.326 | 0.043 | turquoise |
| ENSG0000137876 | RSL24D1 | ribosomal L24 domain containing 1 [Source:HGNC Symbol;Acc:HGNC:18479]                                                | protein_coding | -0.241 | -0.165 | 0.076  | 4.318  | 3.848 | 0.027 | turquoise |
| ENSG0000138363 | ATIC    | 5-aminoimidazole-4-carboxamide ribonucleotide formyltransferase/IMP cyclohydrolase [Source:HGNC Symbol;Acc:HGNC:794] | protein_coding | 0.530  | 0.241  | -0.288 | 1.500  | 3.254 | 0.046 | turquoise |
| ENSG0000138623 | SEMA7A  | semaphorin 7A (John Milton Hagen blood group) [Source:HGNC Symbol;Acc:HGNC:10741]                                    | protein_coding | 0.638  | 0.356  | -0.282 | -0.097 | 3.672 | 0.032 | turquoise |
| ENSG0000138738 | PRDM5   | PR/SET domain 5 [Source:HGNC Symbol;Acc:HGNC:9349]                                                                   | protein_coding | -0.204 | 0.110  | 0.314  | 3.657  | 3.211 | 0.048 | turquoise |
| ENSG0000139714 | MORN3   | MORN repeat containing 3 [Source:HGNC Symbol;Acc:HGNC:29807]                                                         | protein_coding | -0.831 | -0.024 | 0.807  | -1.867 | 4.480 | 0.016 | turquoise |
| ENSG0000140983 | RHOT2   | ras homolog family member T2 [Source:HGNC Symbol;Acc:HGNC:21169]                                                     | protein_coding | 0.266  | 0.022  | -0.244 | 3.270  | 3.734 | 0.030 | turquoise |
| ENSG0000141668 | CBLN2   | cerebellin 2 precursor [Source:HGNC Symbol;Acc:HGNC:1544]                                                            | protein_coding | -1.858 | -1.538 | 0.320  | -2.318 | 5.888 | 0.005 | turquoise |
| ENSG0000143033 | MTF2    | metal response element binding transcription factor 2 [Source:HGNC Symbol;Acc:HGNC:29535]                            | protein_coding | 0.304  | 0.295  | -0.009 | 2.380  | 3.279 | 0.045 | turquoise |
| ENSG0000143162 | CREG1   | cellular repressor of E1A stimulated genes 1 [Source:HGNC Symbol;Acc:HGNC:2351]                                      | protein_coding | -0.171 | -0.226 | -0.054 | 5.171  | 4.137 | 0.021 | turquoise |
| ENSG0000143970 | ASXL2   | ASXL transcriptional regulator 2 [Source:HGNC Symbol;Acc:HGNC:23805]                                                 | protein_coding | 0.251  | 0.096  | -0.155 | 4.723  | 4.088 | 0.022 | turquoise |
| ENSG0000146006 | LRRTM2  | leucine rich repeat transmembrane neuronal 2 [Source:HGNC Symbol;Acc:HGNC:19409]                                     | protein_coding | 1.167  | 0.938  | -0.229 | -1.976 | 4.536 | 0.015 | turquoise |
| ENSG0000146278 | PNRC1   | proline rich nuclear receptor coactivator 1 [Source:HGNC Symbol;Acc:HGNC:17278]                                      | protein_coding | -0.208 | -0.101 | 0.107  | 6.229  | 3.899 | 0.026 | turquoise |
| ENSG0000147419 | CCDC25  | coiled-coil domain containing 25 [Source:HGNC Symbol;Acc:HGNC:25591]                                                 | protein_coding | -0.215 | -0.146 | 0.069  | 3.726  | 3.286 | 0.045 | turquoise |
| ENSG0000148803 | FUOM    | fucose mutarotase [Source:HGNC Symbol;Acc:HGNC:24733]                                                                | protein_coding | -0.359 | -0.272 | 0.087  | 0.764  | 3.396 | 0.041 | turquoise |
| ENSG0000149532 | CPSF7   | cleavage and polyadenylation specific factor 7 [Source:HGNC Symbol;Acc:HGNC:30098]                                   | protein_coding | 0.220  | 0.102  | -0.118 | 4.057  | 3.730 | 0.030 | turquoise |



|                 |            |                                                                                               |                |        |        |        |        |       |       |           |
|-----------------|------------|-----------------------------------------------------------------------------------------------|----------------|--------|--------|--------|--------|-------|-------|-----------|
| ENSG00000156875 | MFSD14A    | major facilitator superfamily domain containing 14A [Source:HGNC Symbol;Acc:HGNC:23363]       | protein_coding | -0.159 | -0.014 | 0.145  | 3.701  | 3.246 | 0.047 | turquoise |
| ENSG00000159023 | EPB41      | erythrocyte membrane protein band 4.1 [Source:HGNC Symbol;Acc:HGNC:3377]                      | protein_coding | 0.312  | 0.283  | -0.029 | 4.131  | 4.494 | 0.016 | turquoise |
| ENSG00000159788 | RGS12      | regulator of G protein signaling 12 [Source:HGNC Symbol;Acc:HGNC:9994]                        | protein_coding | 0.416  | 0.122  | -0.294 | 2.446  | 5.176 | 0.009 | turquoise |
| ENSG00000160007 | ARHGAP35   | Rho GTPase activating protein 35 [Source:HGNC Symbol;Acc:HGNC:4591]                           | protein_coding | 0.177  | 0.188  | 0.011  | 6.083  | 3.666 | 0.032 | turquoise |
| ENSG00000160321 | ZNF208     | zinc finger protein 208 [Source:HGNC Symbol;Acc:HGNC:12999]                                   | protein_coding | -0.871 | -0.070 | 0.801  | 2.777  | 8.398 | 0.001 | turquoise |
| ENSG00000160408 | ST6GALNAC6 | ST6 N-acetylgalactosaminide alpha-2,6-sialyltransferase 6 [Source:HGNC Symbol;Acc:HGNC:23364] | protein_coding | -0.231 | -0.211 | 0.020  | 4.699  | 4.203 | 0.020 | turquoise |
| ENSG00000160803 | UBQLN4     | ubiquilin 4 [Source:HGNC Symbol;Acc:HGNC:1237]                                                | protein_coding | 0.209  | 0.014  | -0.195 | 3.223  | 4.732 | 0.013 | turquoise |
| ENSG00000160908 | ZNF394     | zinc finger protein 394 [Source:HGNC Symbol;Acc:HGNC:18832]                                   | protein_coding | -0.197 | -0.114 | 0.083  | 2.996  | 3.632 | 0.033 | turquoise |
| ENSG00000161970 | RPL26      | ribosomal protein L26 [Source:HGNC Symbol;Acc:HGNC:10327]                                     | protein_coding | -0.153 | -0.141 | 0.013  | 7.280  | 3.221 | 0.048 | turquoise |
| ENSG00000163291 | PAQR3      | progesterin and adipoQ receptor family member 3 [Source:HGNC Symbol;Acc:HGNC:30130]           | protein_coding | -0.291 | -0.240 | 0.051  | 2.042  | 3.452 | 0.039 | turquoise |
| ENSG00000163655 | GMPS       | guanine monophosphate synthase [Source:HGNC Symbol;Acc:HGNC:4378]                             | protein_coding | -0.181 | -0.049 | 0.132  | 4.148  | 3.642 | 0.033 | turquoise |
| ENSG00000164944 | VIRMA      | vir like m6A methyltransferase associated [Source:HGNC Symbol;Acc:HGNC:24500]                 | protein_coding | 0.228  | 0.286  | 0.058  | 4.445  | 3.774 | 0.029 | turquoise |
| ENSG00000166562 | SEC11C     | SEC11 homolog C, signal peptidase complex subunit [Source:HGNC Symbol;Acc:HGNC:23400]         | protein_coding | -0.203 | -0.029 | 0.174  | 2.184  | 3.284 | 0.045 | turquoise |
| ENSG00000167524 | RSKR       | ribosomal protein S6 kinase related [Source:HGNC Symbol;Acc:HGNC:26314]                       | protein_coding | 0.590  | 0.393  | -0.197 | -0.179 | 3.238 | 0.047 | turquoise |
| ENSG00000169379 | ARL13B     | ADP ribosylation factor like GTPase 13B [Source:HGNC Symbol;Acc:HGNC:25419]                   | protein_coding | -0.317 | -0.153 | 0.164  | 2.154  | 3.302 | 0.044 | turquoise |
| ENSG00000170296 | GABARA P   | GABA type A receptor-associated protein [Source:HGNC Symbol;Acc:HGNC:4067]                    | protein_coding | -0.121 | -0.203 | -0.082 | 5.172  | 3.280 | 0.045 | turquoise |
| ENSG00000170484 | KRT74      | keratin 74 [Source:HGNC Symbol;Acc:HGNC:28929]                                                | protein_coding | -1.460 | -0.210 | 1.251  | -3.427 | 4.834 | 0.012 | turquoise |
| ENSG00000171132 | PRKCE      | protein kinase C epsilon [Source:HGNC Symbol;Acc:HGNC:9401]                                   | protein_coding | 0.326  | 0.332  | 0.006  | 2.746  | 3.177 | 0.050 | turquoise |
| ENSG00000171943 | SRGAP2C    | SLIT-ROBO Rho GTPase activating protein 2C [Source:HGNC Symbol;Acc:HGNC:30584]                | protein_coding | -0.481 | -0.436 | 0.044  | 4.035  | 4.918 | 0.011 | turquoise |
| ENSG00000172007 | RAB33B     | RAB33B, member RAS oncogene family [Source:HGNC Symbol;Acc:HGNC:16075]                        | protein_coding | -0.167 | 0.021  | 0.188  | 3.208  | 3.567 | 0.035 | turquoise |
| ENSG00000172594 | SMPDL3A    | sphingomyelin phosphodiesterase acid like 3A [Source:HGNC Symbol;Acc:HGNC:17389]              | protein_coding | -0.379 | -0.377 | 0.002  | 1.412  | 6.345 | 0.003 | turquoise |
| ENSG00000174444 | RPL4       | ribosomal protein L4 [Source:HGNC Symbol;Acc:HGNC:10353]                                      | protein_coding | -0.193 | -0.152 | 0.041  | 7.818  | 3.688 | 0.032 | turquoise |

|                 |             |                                                                                               |                                    |        |        |        |        |       |       |           |
|-----------------|-------------|-----------------------------------------------------------------------------------------------|------------------------------------|--------|--------|--------|--------|-------|-------|-----------|
| ENSG00000175137 | SH3BP5L     | SH3 binding domain protein 5 like [Source:HGNC Symbol;Acc:HGNC:29360]                         | protein_coding                     | 0.204  | 0.161  | -0.043 | 3.050  | 4.098 | 0.022 | turquoise |
| ENSG00000177707 | NECTIN3     | nectin cell adhesion molecule 3 [Source:HGNC Symbol;Acc:HGNC:17664]                           | protein_coding                     | -0.296 | -0.477 | -0.181 | 2.999  | 4.526 | 0.015 | turquoise |
| ENSG00000178104 | PDE4DIP     | phosphodiesterase 4D interacting protein [Source:HGNC Symbol;Acc:HGNC:15580]                  | protein_coding                     | 0.276  | 0.260  | -0.016 | 8.902  | 7.032 | 0.002 | turquoise |
| ENSG00000179583 | CIITA       | class II major histocompatibility complex transactivator [Source:HGNC Symbol;Acc:HGNC:7067]   | protein_coding                     | 0.504  | 0.298  | -0.205 | 2.714  | 3.908 | 0.026 | turquoise |
| ENSG00000179776 | CDH5        | cadherin 5 [Source:HGNC Symbol;Acc:HGNC:1764]                                                 | protein_coding                     | 0.308  | 0.277  | -0.031 | 4.854  | 3.335 | 0.043 | turquoise |
| ENSG00000181126 | HLA-V       | major histocompatibility complex, class I, V (pseudogene) [Source:HGNC Symbol;Acc:HGNC:23482] | transcribed_unprocessed_pseudogene | -1.238 | -0.060 | 1.177  | -2.874 | 3.899 | 0.026 | turquoise |
| ENSG00000185222 | TCEAL9      | transcription elongation factor A like 9 [Source:HGNC Symbol;Acc:HGNC:30084]                  | protein_coding                     | -0.222 | -0.171 | 0.051  | 3.550  | 4.252 | 0.019 | turquoise |
| ENSG00000187720 | THSD4       | thrombospondin type 1 domain containing 4 [Source:HGNC Symbol;Acc:HGNC:25835]                 | protein_coding                     | 0.313  | 0.215  | -0.097 | 5.703  | 4.725 | 0.013 | turquoise |
| ENSG00000188322 | SBK1        | SH3 domain binding kinase 1 [Source:HGNC Symbol;Acc:HGNC:17699]                               | protein_coding                     | 1.058  | 0.764  | -0.294 | -2.553 | 3.464 | 0.038 | turquoise |
| ENSG00000188846 | RPL14       | ribosomal protein L14 [Source:HGNC Symbol;Acc:HGNC:10305]                                     | protein_coding                     | -0.162 | -0.160 | 0.002  | 6.353  | 3.993 | 0.024 | turquoise |
| ENSG00000189266 | PNRC2       | proline rich nuclear receptor coactivator 2 [Source:HGNC Symbol;Acc:HGNC:23158]               | protein_coding                     | -0.147 | -0.016 | 0.131  | 5.390  | 4.693 | 0.013 | turquoise |
| ENSG00000197140 | ADAM32      | ADAM metalloproteinase domain 32 [Source:HGNC Symbol;Acc:HGNC:15479]                          | protein_coding                     | -0.573 | -0.384 | 0.189  | 1.613  | 3.865 | 0.027 | turquoise |
| ENSG00000215458 | AATBC       | apoptosis associated transcript in bladder cancer [Source:HGNC Symbol;Acc:HGNC:51526]         | lncRNA                             | 0.773  | 1.149  | 0.376  | -2.811 | 3.221 | 0.048 | turquoise |
| ENSG00000215912 | TTC34       | tetratricopeptide repeat domain 34 [Source:HGNC Symbol;Acc:HGNC:34297]                        | protein_coding                     | 0.856  | 0.295  | -0.561 | -1.270 | 4.869 | 0.011 | turquoise |
| ENSG00000225684 | FAM225B     | family with sequence similarity 225 member B [Source:HGNC Symbol;Acc:HGNC:21865]              | lncRNA                             | 0.183  | 1.725  | 1.542  | -1.866 | 4.692 | 0.013 | turquoise |
| ENSG00000225791 | TRAM2-AS1   | TRAM2 antisense RNA 1 (head to head) [Source:HGNC Symbol;Acc:HGNC:48663]                      | lncRNA                             | -0.341 | -0.239 | 0.103  | 1.938  | 4.942 | 0.011 | turquoise |
| ENSG00000229657 | AL39182.2.1 | ribosomal protein L13a (RPL13A) pseudogene                                                    | processed_pseudogene               | 0.992  | 1.247  | 0.255  | -2.058 | 5.390 | 0.007 | turquoise |
| ENSG00000230373 | GOLGA6L5P   | golgin A6 family like 5, pseudogene [Source:HGNC Symbol;Acc:HGNC:30472]                       | transcribed_unprocessed_pseudogene | 0.104  | -0.802 | -0.906 | -0.071 | 3.945 | 0.025 | turquoise |
| ENSG00000241790 | ENO1P4      | enolase 1 pseudogene 4 [Source:HGNC Symbol;Acc:HGNC:37945]                                    | processed_pseudogene               | 0.603  | 1.971  | 1.369  | -4.090 | 4.862 | 0.011 | turquoise |
| ENSG00000256977 | LIMS3       | LIM zinc finger domain containing 3 [Source:HGNC Symbol;Acc:HGNC:30047]                       | protein_coding                     | 0.710  | 0.401  | -0.309 | 0.728  | 3.222 | 0.048 | turquoise |
| ENSG00000257379 | AC023509.1  | novel transcript                                                                              | lncRNA                             | 1.922  | 1.952  | 0.030  | -1.213 | 3.360 | 0.042 | turquoise |
| ENSG00000258484 | SPESP1      | sperm equatorial segment protein 1 [Source:HGNC Symbol;Acc:HGNC:15570]                        | protein_coding                     | -1.085 | -0.084 | 1.001  | 0.451  | 6.878 | 0.002 | turquoise |

|                 |            |                                                                                                 |                |        |        |        |        |       |       |           |
|-----------------|------------|-------------------------------------------------------------------------------------------------|----------------|--------|--------|--------|--------|-------|-------|-----------|
| ENSG0000265681  | RPL17      | ribosomal protein L17 [Source:HGNC Symbol;Acc:HGNC:10307]                                       | protein_coding | -0.164 | -0.110 | 0.054  | 6.684  | 3.588 | 0.034 | turquoise |
| ENSG0000266086  | AC015813.2 | novel transcript                                                                                | protein_coding | 0.796  | -0.206 | -1.003 | 0.548  | 5.413 | 0.007 | turquoise |
| ENSG0000268555  | AC123912.4 | novel transcript                                                                                | lncRNA         | -0.088 | 0.509  | 0.597  | 0.314  | 3.445 | 0.039 | turquoise |
| ENSG0000274272  | AC069281.2 | novel transcript                                                                                | lncRNA         | 1.326  | 1.305  | -0.021 | -1.874 | 3.944 | 0.025 | turquoise |
| ENSG0000280351  | AC127496.7 | TEC                                                                                             | TEC            | 0.843  | 0.990  | 0.147  | -2.446 | 3.776 | 0.029 | turquoise |
| ENSG0000284691  | AC073111.4 | novel zinc finger protein                                                                       | protein_coding | 0.334  | -0.138 | -0.471 | 0.670  | 5.207 | 0.009 | turquoise |
| ENSG0000287839  | AL353807.5 | novel transcript                                                                                | lncRNA         | 0.661  | 0.185  | -0.477 | -1.399 | 3.480 | 0.038 | turquoise |
| ENSG00000057294 | PKP2       | plakophilin 2 [Source:HGNC Symbol;Acc:HGNC:9024]                                                | protein_coding | 0.256  | 0.132  | -0.124 | 7.028  | 3.897 | 0.026 | yellow    |
| ENSG00000073910 | FRY        | FRY microtubule binding protein [Source:HGNC Symbol;Acc:HGNC:20367]                             | protein_coding | 0.190  | 0.312  | 0.122  | 6.255  | 5.019 | 0.010 | yellow    |
| ENSG00000101608 | MYL12A     | myosin light chain 12A [Source:HGNC Symbol;Acc:HGNC:16701]                                      | protein_coding | 0.454  | 0.080  | -0.374 | 7.847  | 5.757 | 0.005 | yellow    |
| ENSG00000101871 | MID1       | midline 1 [Source:HGNC Symbol;Acc:HGNC:7095]                                                    | protein_coding | -0.291 | -0.147 | 0.144  | 4.153  | 3.352 | 0.042 | yellow    |
| ENSG00000103710 | RASL12     | RAS like family 12 [Source:HGNC Symbol;Acc:HGNC:30289]                                          | protein_coding | 0.258  | 0.124  | -0.134 | 4.180  | 3.637 | 0.033 | yellow    |
| ENSG00000107165 | TYRP1      | tyrosinase related protein 1 [Source:HGNC Symbol;Acc:HGNC:12450]                                | protein_coding | 0.361  | 0.041  | -0.321 | 3.461  | 3.754 | 0.030 | yellow    |
| ENSG00000116977 | LGALS8     | galectin 8 [Source:HGNC Symbol;Acc:HGNC:6569]                                                   | protein_coding | 0.232  | 0.058  | -0.174 | 5.499  | 4.494 | 0.016 | yellow    |
| ENSG00000123901 | GPR83      | G protein-coupled receptor 83 [Source:HGNC Symbol;Acc:HGNC:4523]                                | protein_coding | 0.585  | -0.050 | -0.635 | -0.119 | 3.548 | 0.036 | yellow    |
| ENSG00000133169 | BEX1       | brain expressed X-linked 1 [Source:HGNC Symbol;Acc:HGNC:1036]                                   | protein_coding | -0.842 | -0.386 | 0.456  | 1.433  | 3.878 | 0.027 | yellow    |
| ENSG00000134571 | MYBPC3     | myosin binding protein C3 [Source:HGNC Symbol;Acc:HGNC:7551]                                    | protein_coding | 0.233  | 0.156  | -0.077 | 8.845  | 3.908 | 0.026 | yellow    |
| ENSG00000136040 | PLXNC1     | plexin C1 [Source:HGNC Symbol;Acc:HGNC:9106]                                                    | protein_coding | -0.339 | 0.023  | 0.362  | 2.522  | 3.345 | 0.043 | yellow    |
| ENSG00000136144 | RCBTB1     | RCC1 and BTB domain containing protein 1 [Source:HGNC Symbol;Acc:HGNC:18243]                    | protein_coding | 0.222  | 0.135  | -0.087 | 3.780  | 4.322 | 0.018 | yellow    |
| ENSG00000136932 | TRMO       | tRNA methyltransferase O [Source:HGNC Symbol;Acc:HGNC:30967]                                    | protein_coding | -0.243 | -0.202 | 0.041  | 1.848  | 3.464 | 0.038 | yellow    |
| ENSG00000141664 | ZCCHC2     | zinc finger CCHC-type containing 2 [Source:HGNC Symbol;Acc:HGNC:22916]                          | protein_coding | 0.170  | -0.115 | -0.284 | 3.247  | 3.764 | 0.030 | yellow    |
| ENSG00000146197 | SCUBE3     | signal peptide, CUB domain and EGF like domain containing 3 [Source:HGNC Symbol;Acc:HGNC:13655] | protein_coding | 0.685  | 0.080  | -0.605 | 0.040  | 3.592 | 0.034 | yellow    |

|                 |            |                                                                                         |                                  |        |        |        |        |       |       |        |
|-----------------|------------|-----------------------------------------------------------------------------------------|----------------------------------|--------|--------|--------|--------|-------|-------|--------|
| ENSG00000148660 | CAMK2G     | calcium/calmodulin dependent protein kinase II gamma [Source:HGNC Symbol;Acc:HGNC:1463] | protein_coding                   | 0.295  | 0.242  | -0.053 | 2.768  | 4.071 | 0.023 | yellow |
| ENSG00000148925 | BTBD10     | BTB domain containing 10 [Source:HGNC Symbol;Acc:HGNC:21445]                            | protein_coding                   | -0.219 | 0.021  | 0.240  | 3.754  | 5.681 | 0.006 | yellow |
| ENSG00000163145 | C1QTNF7    | C1q and TNF related 7 [Source:HGNC Symbol;Acc:HGNC:14342]                               | protein_coding                   | -0.494 | -0.335 | 0.159  | 2.377  | 4.599 | 0.014 | yellow |
| ENSG00000163681 | SLMAP      | sarcolemma associated protein [Source:HGNC Symbol;Acc:HGNC:16643]                       | protein_coding                   | 0.367  | 0.186  | -0.181 | 7.039  | 3.787 | 0.029 | yellow |
| ENSG00000166974 | MAPRE2     | microtubule associated protein RP/EB family member 2 [Source:HGNC Symbol;Acc:HGNC:6891] | protein_coding                   | 0.200  | 0.076  | -0.124 | 6.062  | 3.448 | 0.039 | yellow |
| ENSG00000175084 | DES        | desmin [Source:HGNC Symbol;Acc:HGNC:2770]                                               | protein_coding                   | 0.238  | 0.191  | -0.047 | 10.761 | 7.549 | 0.001 | yellow |
| ENSG00000175182 | FAM131A    | family with sequence similarity 131 member A [Source:HGNC Symbol;Acc:HGNC:28308]        | protein_coding                   | 0.271  | 0.294  | 0.022  | 2.613  | 3.290 | 0.045 | yellow |
| ENSG00000196109 | ZNF676     | zinc finger protein 676 [Source:HGNC Symbol;Acc:HGNC:20429]                             | protein_coding                   | -0.418 | -0.103 | 0.315  | 1.288  | 3.306 | 0.044 | yellow |
| ENSG00000197977 | ELOVL2     | ELOVL fatty acid elongase 2 [Source:HGNC Symbol;Acc:HGNC:14416]                         | protein_coding                   | 0.501  | 0.026  | -0.475 | 0.202  | 3.724 | 0.031 | yellow |
| ENSG00000198467 | TPM2       | tropomyosin 2 [Source:HGNC Symbol;Acc:HGNC:12011]                                       | protein_coding                   | 0.213  | 0.130  | -0.082 | 7.110  | 3.314 | 0.044 | yellow |
| ENSG00000198952 | SMG5       | SMG5 nonsense mediated mRNA decay factor [Source:HGNC Symbol;Acc:HGNC:24644]            | protein_coding                   | 0.207  | 0.103  | -0.104 | 5.130  | 4.797 | 0.012 | yellow |
| ENSG00000205084 | TMEM231    | transmembrane protein 231 [Source:HGNC Symbol;Acc:HGNC:37234]                           | protein_coding                   | -0.394 | -0.108 | 0.286  | 2.287  | 4.462 | 0.016 | yellow |
| ENSG00000244306 | AL589743.1 | double homeobox A pseudogene 10                                                         | transcribed_processed_pseudogene | -1.053 | -0.920 | 0.133  | 0.051  | 4.192 | 0.020 | yellow |
| ENSG00000260596 | DUX4       | double homeobox 4 [Source:HGNC Symbol;Acc:HGNC:50800]                                   | protein_coding                   | -1.036 | 0.593  | 1.629  | -2.604 | 3.444 | 0.039 | yellow |
| ENSG00000261485 | PAN3-AS1   | PAN3 antisense RNA 1 [Source:HGNC Symbol;Acc:HGNC:39932]                                | lncRNA                           | 0.771  | 0.511  | -0.260 | -1.666 | 5.096 | 0.009 | yellow |
| ENSG00000285238 | AC006064.6 | novel transcript                                                                        | protein_coding                   | 1.987  | 2.646  | 0.659  | -2.431 | 4.253 | 0.019 | yellow |

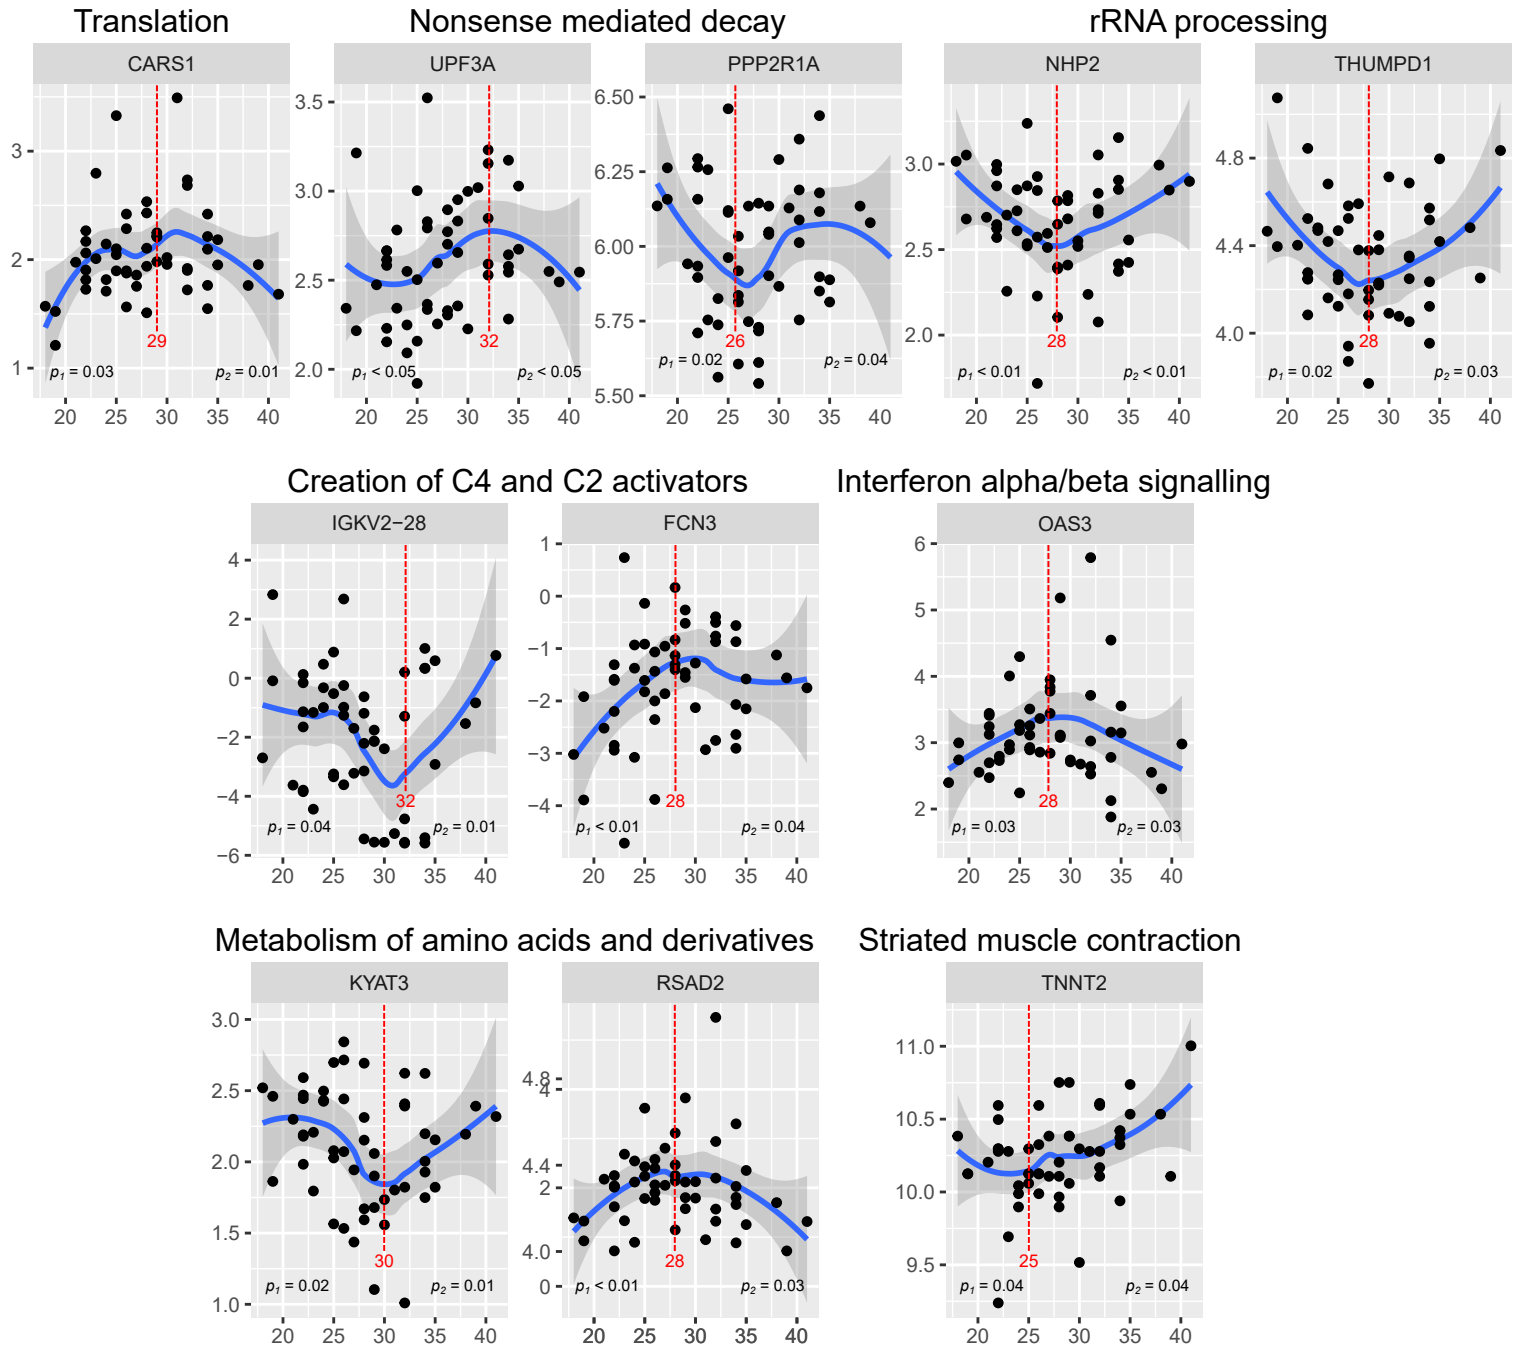

**Figure S1** – Plots of transcripts with the membership in significant pathways and showing biphasic BMI relationship. The blue line shows loess regression trend. Red line indicates a breakpoint identified by the Two Line method;  $p_1$  and  $p_2$  -values indicate significant regression before or after the breakpoint.

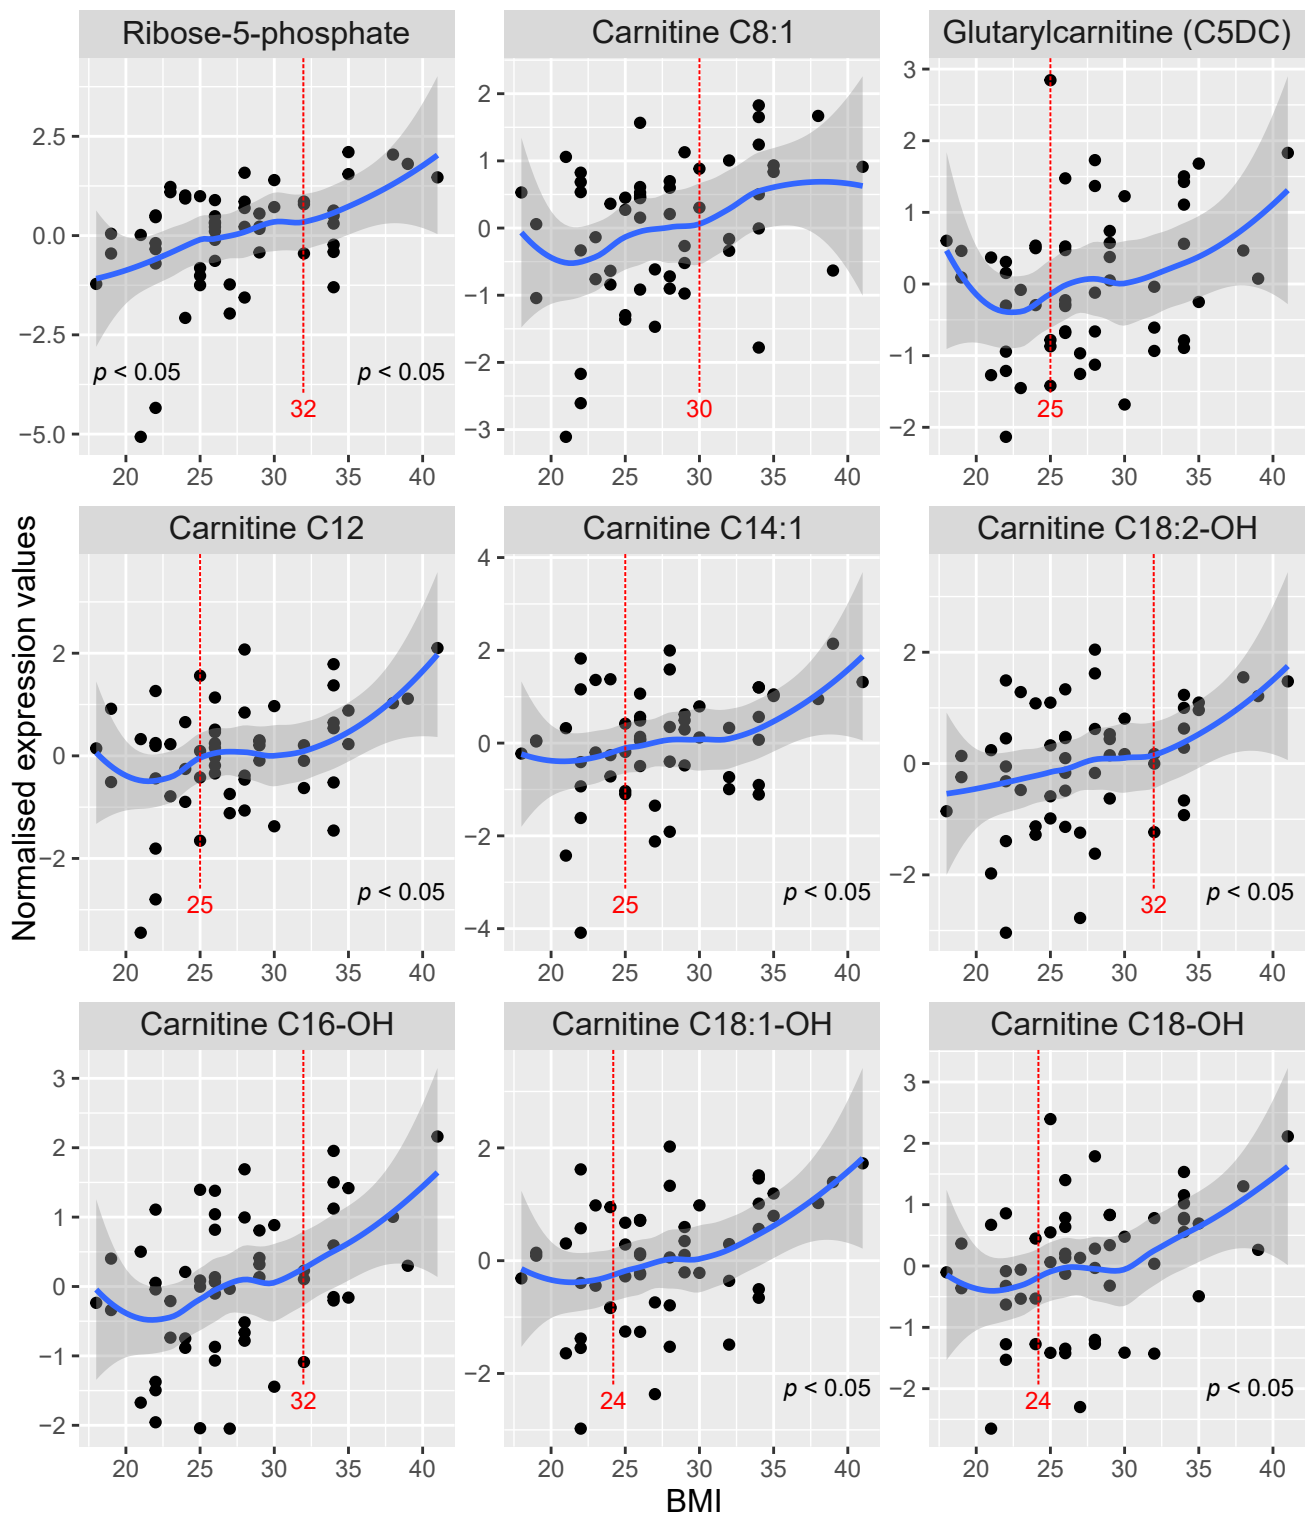

**Figure S1** – Plots of transcripts with the membership in significant pathways and showing biphasic BMI relationship. The blue line shows loess regression trend. Red line indicates a breakpoint identified by the Two Line method;  $p_1$  and  $p_2$  -values indicate significant regression before or after the breakpoint.
